# Supplementary material for: Sex-specific response to A1BG loss results in female dilated cardiomyopathy
Source: Biol Sex Differ. 2025 Apr 23;16:27. doi: 10.1186/s13293-025-00713-8 (PMC12016195; doi:10.1186/s13293-025-00713-8)
Supplement: Supplementary file 1 — Supplementary Material 1 [file 13293_2025_713_MOESM1_ESM.xlsx]

## Sheet: Female KO v Con
	baseMean	log2FoldChange (Con/KO)	lfcSE	stat	pvalue	padj
Cpxm2	710.778	-1.2298	0.126017	-9.75897	1.69e-22	3.2e-18
AI464131	1268.49	0.739834	0.0784663	9.42869	4.15e-21	3.93e-17
Gck	749.536	-1.01652	0.134722	-7.54534	4.51e-14	2.85e-10
Asns	264.342	1.32086	0.189474	6.97117	3.14e-12	1.49e-08
Hba.a1	5630.95	-1.05502	0.157858	-6.68337	2.34e-11	7.37e-08
Polq	398.042	-0.985446	0.147333	-6.68856	2.25e-11	7.37e-08
Adam19	1346.44	-0.773906	0.117729	-6.57363	4.91e-11	1.33e-07
Dbp	6084.97	0.983131	0.151708	6.4804	9.15e-11	2.17e-07
Aqp6	23.4105	4.30014	0.670508	6.41325	1.42e-10	3e-07
Eln	2396.64	-0.864056	0.136167	-6.34554	2.22e-10	4.11e-07
Hba.a2	853.854	-1.16748	0.184317	-6.33411	2.39e-10	4.11e-07
Tcap	71770.1	0.453517	0.0726407	6.24329	4.28e-10	6.77e-07
Pou3f2	28.2058	5.16608	0.835189	6.18552	6.19e-10	9.02e-07
Cep128	767.818	0.703951	0.114144	6.16721	6.95e-10	9.41e-07
Tmod4	661.534	-0.652786	0.107676	-6.0625	1.34e-09	1.69e-06
Ankrd23	579.295	-0.742937	0.123601	-6.01078	1.85e-09	2.19e-06
Amot	519.109	-0.792416	0.135045	-5.86781	4.42e-09	4.92e-06
Plekha7	796.535	0.588286	0.100758	5.83861	5.26e-09	5.54e-06
Hlf	1986.06	0.66581	0.116236	5.72811	1.02e-08	1.01e-05
Pde11a	57.566	-2.32459	0.406786	-5.71452	1.1e-08	1.04e-05
Alas2	587.635	-1.17796	0.21027	-5.60215	2.12e-08	1.91e-05
Sema6c	701.111	0.660946	0.118831	5.56205	2.67e-08	2.3e-05
Per3	2243.68	0.875206	0.165622	5.28435	1.26e-07	0.000103936
Ntng2	466.445	-0.653961	0.124029	-5.27266	1.34e-07	0.000105838
Gja5	778.054	0.57665	0.10951	5.26574	1.4e-07	0.000105838
Lingo2	17.0929	6.35843	1.23868	5.13325	2.85e-07	0.000207566
Igsf23	257.48	0.934259	0.182261	5.12595	2.96e-07	0.000207778
Slc15a2	380.261	0.908252	0.179463	5.06093	4.17e-07	0.00028236
Heatr5b	2849.2	0.380404	0.0764714	4.97447	6.54e-07	0.000427533
Bcl2l11	966.304	0.407782	0.0846955	4.81469	1.47e-06	0.000931276
Acsl6	591.625	-0.539224	0.112376	-4.7984	1.6e-06	0.000977685
Ccdc8	467.829	0.619993	0.131302	4.7219	2.34e-06	0.00134175
Pdzd3	222.136	-0.790473	0.167398	-4.72211	2.33e-06	0.00134175
Pcdh7	4811	0.328821	0.069994	4.69784	2.63e-06	0.00146545
Vgll3	239.494	-0.62982	0.136465	-4.61525	3.93e-06	0.00212573
Zfp30	712.589	0.914652	0.200011	4.57302	4.81e-06	0.0024743
Enpp1	507.564	0.539938	0.118097	4.57199	4.83e-06	0.0024743
Pkd2l2	691.939	-0.46215	0.101609	-4.5483	5.41e-06	0.00269695
Lad1	375.779	0.882387	0.197637	4.4647	8.02e-06	0.00389601
Cdh4	246.978	-1.19295	0.273236	-4.366	1.27e-05	0.00599506
Grin2c	178.095	0.685568	0.157856	4.34301	1.41e-05	0.00649534
Abra	1440.04	-0.628592	0.144912	-4.33773	1.44e-05	0.00649534
Zfp457	61.0526	1.66498	0.386846	4.30399	1.68e-05	0.00739282
Igfals	183.749	-0.890252	0.207938	-4.28133	1.86e-05	0.00800111
AI838599	173.405	0.880088	0.206184	4.26845	1.97e-05	0.008289
Aqp7	679.281	-0.463011	0.108729	-4.25839	2.06e-05	0.00848073
Hbb.bs	8327.58	-1.09405	0.257204	-4.25362	2.1e-05	0.00848073
Nfatc2	747.41	0.435873	0.102842	4.23828	2.25e-05	0.00853662
Gm45456	27.6519	2.56037	0.603239	4.24438	2.19e-05	0.00853662
Adamts6	324.789	0.48103	0.113463	4.23952	2.24e-05	0.00853662
Klf4	1578.98	-0.499254	0.118156	-4.22539	2.39e-05	0.00883773
Trim16	298.689	-0.582718	0.138031	-4.22166	2.43e-05	0.00883773
Rnf207	5645.95	0.319794	0.0759267	4.21188	2.53e-05	0.00888725
Cers4	2655.53	0.414389	0.0983453	4.21362	2.51e-05	0.00888725
Plagl1	476.296	0.498108	0.118437	4.20566	2.6e-05	0.0089693
Tmem164	2156.08	0.439171	0.104731	4.19333	2.75e-05	0.00930221
Gipr	64.2316	1.08354	0.260036	4.16689	3.09e-05	0.0102658
Arc	184.461	0.670382	0.161154	4.15987	3.18e-05	0.0104037
Mal	768.874	-0.375658	0.0906313	-4.1449	3.4e-05	0.0104061
Gm14548	22.8057	2.67608	0.645443	4.14611	3.38e-05	0.0104061
Fah	652.594	-0.535262	0.129148	-4.14456	3.4e-05	0.0104061
Lrp5	3738.66	-0.28383	0.0682988	-4.15571	3.24e-05	0.0104061
Nr1d2	7550.29	0.390117	0.0945061	4.12796	3.66e-05	0.0110091
Gm44954	43.5348	1.67507	0.407075	4.1149	3.87e-05	0.0114691
Col5a3	1326.11	-0.776078	0.188775	-4.11113	3.94e-05	0.0114786
Cdc14b	1239.93	0.772377	0.188153	4.10504	4.04e-05	0.0115834
Efr3b	722.603	-0.359191	0.0875644	-4.10203	4.1e-05	0.0115834
Zfp579	1157.44	0.459962	0.112402	4.09211	4.27e-05	0.0119125
Sbk3	4069.99	0.541517	0.13288	4.07524	4.6e-05	0.0126241
Tmem47	1119.22	0.312624	0.0770582	4.05698	4.97e-05	0.0131938
Gm7993	112.81	2.81836	0.694291	4.05934	4.92e-05	0.0131938
Cxcl14	356.606	-0.813939	0.200724	-4.05502	5.01e-05	0.0131938
Nebl	18155.2	0.260694	0.0650536	4.00737	6.14e-05	0.0151824
Lpar3	39.5349	1.29123	0.321583	4.01524	5.94e-05	0.0151824
Ogdhl	5478.17	-0.687064	0.171498	-4.00625	6.17e-05	0.0151824
Kctd9	2951.39	-0.26954	0.0672564	-4.00765	6.13e-05	0.0151824
Crem	418.814	-0.567122	0.141318	-4.0131	5.99e-05	0.0151824
A1bg	7.26106	-3.34337	0.837253	-3.99326	6.52e-05	0.0158332
Gm44608	7.61678	-3.71657	0.934104	-3.97875	6.93e-05	0.0166179
Chrm2	8061.28	0.340309	0.0856788	3.97192	7.13e-05	0.0167563
Tnfrsf19	277.524	0.68031	0.171327	3.97083	7.16e-05	0.0167563
Podn	2687.5	0.5177	0.130743	3.95967	7.51e-05	0.0171356
Cib3	15.3094	-2.06365	0.520985	-3.96105	7.46e-05	0.0171356
Ift140	523.189	0.578312	0.146458	3.94866	7.86e-05	0.0177298
Ppip5k1	4138.97	-0.434782	0.110452	-3.9364	8.27e-05	0.0180163
Gm45909	94.4671	1.28007	0.324775	3.94141	8.1e-05	0.0180163
Cxxc5	1583.16	0.319305	0.0810613	3.93906	8.18e-05	0.0180163
Srsf3	4173.5	-0.296095	0.0753737	-3.92836	8.55e-05	0.0184175
Sbk2	1466.88	0.489351	0.12536	3.90355	9.48e-05	0.0201833
Gm45104	32.6546	2.32678	0.597585	3.89364	9.88e-05	0.0207927
Frem2	583.076	0.74261	0.192187	3.864	0.000111545	0.0232047
Gm34030	135.053	0.872934	0.226056	3.86158	0.000112656	0.0232047
Il11ra1	2675.86	-0.335385	0.0869814	-3.85582	0.00011534	0.0233632
Acsm5	221.571	-1.08695	0.281984	-3.85466	0.000115891	0.0233632
Cx3cl1	499.96	-0.368842	0.0961664	-3.83546	0.00012533	0.0250001
Xist	10526.5	0.234971	0.0613897	3.82753	0.000129434	0.0255497
Bhlhe41	1750.79	0.368278	0.0962831	3.82495	0.000130801	0.0255534
Nkain1	304.437	-0.609542	0.159571	-3.81987	0.000133521	0.0258186
Popdc3	1073.75	-0.315838	0.0828014	-3.8144	0.000136514	0.0258694
Atcayos	1603.39	-0.466387	0.122254	-3.8149	0.00013624	0.0258694
Optn	3891.14	-0.520997	0.136763	-3.80948	0.000139258	0.0261281
Ighg2c	197.659	-0.974263	0.256781	-3.79414	0.000148155	0.0275249
Armc2	1917.96	-0.513075	0.135626	-3.78301	0.000154943	0.0276998
Acsf2	1929.59	-0.529407	0.139923	-3.78357	0.000154594	0.0276998
Dapk1	2553.99	-0.285087	0.0753148	-3.78528	0.000153538	0.0276998
Pstpip2	621.805	-0.3901	0.102926	-3.79011	0.000150582	0.0276998
Rps6ka5	862.452	0.359299	0.0950568	3.77983	0.000156935	0.0277937
Zfp759	244.767	0.552054	0.146402	3.77081	0.000162716	0.0285507
Plxnb1	3743.86	0.39983	0.106441	3.75636	0.000172401	0.0297
Shmt1	526.62	-0.440859	0.117311	-3.75803	0.000171259	0.0297
Nqo1	1768.71	-0.390948	0.104395	-3.74488	0.000180482	0.030812
Hdac9	1340.24	0.515103	0.137663	3.74176	0.000182733	0.0309178
Gm44769	107.815	0.900362	0.240909	3.73735	0.000185967	0.0309807
Myot	1548.92	-0.595831	0.159449	-3.7368	0.000186374	0.0309807
Rel	506.298	-0.381577	0.102411	-3.72592	0.000194605	0.0320675
Gm31678	37.6539	-1.15296	0.310143	-3.71751	0.000201197	0.032868
Bpgm	957.096	-0.405429	0.109138	-3.71485	0.000203325	0.0329317
Fam220a	2801.68	-0.365432	0.0985423	-3.70838	0.000208593	0.0334986
Hbb.bt	1413.98	-1.32991	0.359368	-3.70069	0.000215017	0.0342401
Best3	242.775	-0.5717	0.155076	-3.68659	0.000227279	0.0358911
Klhl32	314.291	0.58381	0.158536	3.6825	0.000230953	0.03617
Lmcd1	1392.18	-0.387444	0.105395	-3.67612	0.000236805	0.0364834
Tef	10228	0.469201	0.127579	3.67771	0.000235333	0.0364834
Gm28661	36330.9	0.317147	0.0864133	3.67011	0.000242443	0.0365788
Ifi44l	30.8562	5.72628	1.56231	3.66527	0.000247076	0.0365788
Htra4	157.412	0.814433	0.222118	3.66667	0.000245733	0.0365788
Adra1a	1056.12	-0.554385	0.151004	-3.67133	0.000241289	0.0365788
Mrm1	1096.49	0.287967	0.0784837	3.66914	0.000243372	0.0365788
Rgs4	781.552	-0.342198	0.0934562	-3.66158	0.00025066	0.0366584
Sox12	1244.35	0.354548	0.0968514	3.66075	0.000251482	0.0366584
Plppr5	58.348	0.952819	0.261515	3.64345	0.000269004	0.038169
Cntfr	302.682	0.47506	0.130412	3.64275	0.00026974	0.038169
Vwa3a	441.925	-0.749367	0.205723	-3.6426	0.000269902	0.038169
Nrxn2	409.676	-0.520163	0.142692	-3.64537	0.000267007	0.038169
Aqp8	67.5099	-1.12852	0.309975	-3.64068	0.000271918	0.0381693
Tecpr1	2802.23	-0.333002	0.0918467	-3.62563	0.000288258	0.0398541
Zfp264	22.6328	4.77967	1.31893	3.62391	0.000290186	0.0398541
Htatip2	836.903	-0.465158	0.128426	-3.62198	0.000292357	0.0398541
Lonrf1	584.959	0.709665	0.196048	3.61985	0.000294769	0.0398541
Gm48605	23.353	-1.39719	0.386046	-3.61923	0.000295476	0.0398541
Sh3rf2	1233.38	0.284454	0.0786153	3.6183	0.00029654	0.0398541
Zbp1	113.763	1.11221	0.307884	3.61243	0.000303338	0.0404806
Ndnf	470.46	0.440888	0.122185	3.60835	0.000308145	0.0408346
Smtnl2	819.625	0.509851	0.141386	3.6061	0.000310839	0.0409055
Rhobtb3	1156.77	0.666764	0.185183	3.60056	0.000317532	0.0414981
Mettl11b	36.0061	-1.40924	0.392292	-3.59232	0.000327753	0.0417586
Kcnj3	4899.01	0.370187	0.102989	3.59442	0.000325111	0.0417586
Psca	13.5068	2.35967	0.656609	3.59372	0.000325984	0.0417586
Rcan1	3118.56	-0.345918	0.0963063	-3.59185	0.000328339	0.0417586
Zbtb16	3956.34	-1.06524	0.296891	-3.58799	0.000333232	0.0420521
Arrdc3	2202.73	0.447099	0.12466	3.58655	0.000335085	0.0420521
Nr4a3	102.76	-0.865928	0.241723	-3.58232	0.000340558	0.0422502
Wisp1	184.178	0.823262	0.22984	3.58189	0.000341123	0.0422502
Zbtb17	1163.67	-0.280256	0.0784106	-3.57421	0.000351289	0.0429479
Slc22a3	421.196	-0.574551	0.160699	-3.57531	0.000349807	0.0429479
Wee1	978.54	0.664637	0.186079	3.57181	0.000354524	0.0430656
Gipc2	94.4489	-0.891274	0.249871	-3.56693	0.000361189	0.0435957
Kcnj2	2183.82	0.3205	0.0899091	3.56471	0.000364258	0.0436879
Zfp369	488.354	0.54721	0.153868	3.55637	0.000376015	0.0448144
Sphk2	872.02	-0.446639	0.125666	-3.55417	0.000379178	0.0449088
X9230112J17Rik	336.581	-0.460831	0.129885	-3.54799	0.000388181	0.0456897
Inafm2	1424.11	0.269646	0.0761126	3.54272	0.000396018	0.0461649
Mmp14	794.179	-0.557413	0.157372	-3.54201	0.000397091	0.0461649
Thrb	1148.6	0.328326	0.0929363	3.53281	0.000411173	0.0475105
Tll2	33.6026	1.402	0.397533	3.52675	0.000420689	0.0483155
Yae1d1	2139.44	0.234528	0.0665465	3.52428	0.000424636	0.048475
X9330158H04Rik	611.696	0.334028	0.0948527	3.52154	0.000429042	0.0486847
Aldob	213.711	-1.97704	0.562857	-3.51251	0.000443896	0.0497069
Tmem106a	333.02	0.455145	0.129681	3.50974	0.000448542	0.0497069
Epdr1	1241.73	-0.319686	0.0910397	-3.51151	0.000445577	0.0497069
Myo5b	2044.13	-0.291284	0.0829708	-3.51068	0.000446956	0.0497069
Six5	949.662	0.402196	0.114691	3.50679	0.000453548	0.0499693
Gm9821	655.04	0.362269	0.103589	3.49716	0.000470234	0.0503864
Sv2a	400.311	0.542484	0.154936	3.50134	0.000462932	0.0503864
Slit2	440.932	0.435744	0.124531	3.49908	0.000466863	0.0503864
Leo1	591.058	-0.585077	0.167311	-3.49694	0.000470628	0.0503864
Asap2	1059.8	-0.373756	0.106696	-3.503	0.000460049	0.0503864
Rrp12	1139.51	-0.475148	0.136426	-3.48283	0.000496146	0.05282
Vcam1	1335.43	0.316017	0.0908936	3.47678	0.000507475	0.0531821
Csrp2	883.357	0.422379	0.121495	3.47652	0.000507966	0.0531821
Ifit1	402.041	0.852568	0.245132	3.47799	0.000505182	0.0531821
Slc18a2	136.396	0.566804	0.163266	3.47166	0.000517242	0.0535614
mt.Co3	32767.9	0.366566	0.105547	3.47301	0.000514653	0.0535614
Gm45819	340.483	1.34516	0.388261	3.46457	0.00053108	0.0546955
Epha7	462.651	0.493911	0.142676	3.46176	0.000536649	0.0549702
Arhgef10l	3613.85	-0.272598	0.0789906	-3.45101	0.000558489	0.0565955
Pnmal2	511.999	0.564117	0.163433	3.45166	0.00055714	0.0565955
Prr5	133.887	-0.606591	0.176087	-3.44485	0.000571386	0.0575945
Glrx	910.434	0.484547	0.140762	3.44232	0.000576756	0.0578282
Prkag3	126.635	-0.563474	0.164132	-3.43306	0.000596808	0.0595238
Vwa7	617.073	-0.374351	0.109267	-3.42603	0.000612465	0.0607655
Unc119b	1156.33	-0.273829	0.0801306	-3.41728	0.000632493	0.0619655
H19	1744.17	0.433543	0.126898	3.41648	0.00063437	0.0619655
Prune2	8184.98	-0.487246	0.142604	-3.41678	0.000633666	0.0619655
BC034090	2095.49	0.259037	0.0759398	3.41109	0.000647046	0.0628796
Tdrkh	333.996	-0.408663	0.120146	-3.40137	0.000670485	0.0644959
Cc2d2a	964.566	0.366465	0.107719	3.40204	0.000668841	0.0644959
Gm47469	118.639	0.984083	0.28963	3.39773	0.000679477	0.0650307
Tnfsf10	990.276	0.393003	0.115737	3.39565	0.000684658	0.0651974
St6galnac3	162.521	-0.606344	0.178841	-3.3904	0.000697897	0.0661257
Scd4	950.714	-1.23307	0.364504	-3.38285	0.000717366	0.0676323
C7	209.624	-0.617904	0.183147	-3.37382	0.00074132	0.0695446
Slc16a7	710.123	0.416006	0.123416	3.37077	0.000749574	0.0699725
Tpm3.rs7	220.817	2.76254	0.820892	3.36529	0.000764638	0.0710289
Vmac	316.546	0.407995	0.121364	3.36175	0.000774515	0.0715954
Irx2	388.928	0.38055	0.113338	3.35767	0.000786036	0.0723076
Ccdc141	9414.12	0.282656	0.0845812	3.34183	0.000832282	0.076192
Gpr27	695.357	-0.329556	0.098681	-3.3396	0.000838977	0.0764357
Uck2	1724.21	-0.277427	0.0831897	-3.33487	0.000853384	0.077204
Isg15	189.749	0.986472	0.295868	3.33416	0.000855559	0.077204
Neb	401.524	-0.487745	0.146695	-3.32489	0.000884533	0.0780197
Kcnh2	6356.17	0.318917	0.095839	3.32763	0.00087587	0.0780197
Ywhag	9465.53	-0.186372	0.0560572	-3.32469	0.000885184	0.0780197
Klra9	62.2264	-1.06076	0.318962	-3.32568	0.00088203	0.0780197
Cmss1	2161.75	0.391231	0.117519	3.32909	0.000871313	0.0780197
Steap4	1643.48	-0.348167	0.105054	-3.31416	0.000919177	0.0806408
Dusp8	1689.83	-0.29609	0.0894188	-3.31127	0.000928742	0.0811044
Gbp2b	110.968	4.62604	1.39862	3.30757	0.000941095	0.0815022
Gm36372	79.4481	-0.99029	0.299423	-3.30733	0.000941899	0.0815022
Rapgef1	6734.45	-0.238234	0.0721762	-3.30073	0.000964335	0.0826884
Rabgef1	1020.09	-0.270965	0.0820815	-3.30117	0.00096284	0.0826884
Adgrg1	2141.89	-0.419642	0.127244	-3.29794	0.000973978	0.0831391
Schip1	389.174	0.355091	0.108139	3.28365	0.00102473	0.0870791
Bcl2l1	1718.16	-0.539488	0.165164	-3.26637	0.00108935	0.0920223
Gm48626	17.1333	-1.56511	0.479282	-3.26553	0.00109261	0.0920223
Lgi1	101.34	-0.838062	0.256809	-3.26337	0.00110095	0.0923142
Stk40	2972.94	-0.220101	0.0676138	-3.25527	0.00113284	0.0941552
Baiap2	444.409	-0.336406	0.103328	-3.25571	0.00113109	0.0941552
Efhd1	134.537	-0.746167	0.229371	-3.2531	0.00114153	0.0944627
Alox5	697.137	-0.530999	0.163372	-3.25024	0.00115308	0.0950037
Alpk1	255.986	0.408884	0.125907	3.24752	0.00116416	0.0950901
Ifi27l2a	906.151	0.553874	0.170551	3.24756	0.00116399	0.0950901
Mid1ip1	5322.53	0.389269	0.120115	3.24079	0.00119198	0.0969441
Cbx4	419.791	0.473531	0.146354	3.23552	0.00121421	0.0983306
Slc2a12	445.05	0.578573	0.179015	3.23198	0.00122934	0.0987116
Cmtm6	1505.05	-0.251275	0.0777199	-3.23309	0.00122459	0.0987116
Syde2	2198.82	0.316254	0.097903	3.23028	0.00123667	0.0988817
Palmd	2449.71	-0.230428	0.0714268	-3.22608	0.001255	0.0999256
Srxn1	1004.99	-0.32324	0.100548	-3.21477	0.00130548	0.102855
Vamp5	1478.05	-0.345355	0.10738	-3.2162	0.00129902	0.102855
Erc2	56.596	-0.782134	0.243337	-3.2142	0.00130808	0.102855
Ifit3b	253.061	0.771897	0.240533	3.20911	0.00133147	0.104262
Tmem159	1051.96	-0.240524	0.075262	-3.19582	0.00139434	0.108735
Asb5	707.449	-0.359327	0.112603	-3.19111	0.00141728	0.110072
Myl7	17025.5	0.434308	0.136945	3.17141	0.00151699	0.117335
Zfp874b	413.133	0.386811	0.122064	3.16892	0.00153007	0.117865
Gpatch4	519.544	-0.420567	0.132795	-3.16704	0.00154	0.117902
Kcnc1	51.5203	-1.1993	0.37875	-3.16647	0.001543	0.117902
Abca4	525.83	0.699328	0.220953	3.16505	0.00155054	0.118003
Tnni1	34.9885	1.27881	0.40526	3.15554	0.00160199	0.12086
Scn1b	949.975	-0.279098	0.0884372	-3.15589	0.00160009	0.12086
Slc25a23	2697.9	0.259734	0.0823351	3.1546	0.00160721	0.12086
Adamts8	184.444	0.778416	0.246907	3.15267	0.00161785	0.121179
Gm6472	281.037	2.21436	0.703159	3.14915	0.00163744	0.122163
Kcnq4	341.884	-0.528856	0.168021	-3.14755	0.00164644	0.122353
Anxa3	1166.25	-0.327509	0.104153	-3.1445	0.00166368	0.123151
Zfp808	87.5437	0.649508	0.206709	3.14214	0.00167716	0.123666
Slc45a3	198.209	-0.534309	0.17019	-3.13948	0.0016925	0.124313
Dcun1d3	410.343	-0.34	0.108342	-3.13823	0.00169972	0.124362
Fam102b	923.666	-0.268469	0.0856414	-3.13481	0.00171967	0.125337
Cavin4	4357.59	-0.315645	0.10088	-3.12891	0.00175456	0.126422
Abhd14a	519.414	0.346195	0.110614	3.12976	0.00174948	0.126422
Fer1l6	66.5396	0.801514	0.256077	3.12997	0.00174826	0.126422
Entpd5	12088.1	0.233347	0.0747038	3.12362	0.00178638	0.128227
Mgst1	1366.38	-0.457119	0.146796	-3.11398	0.00184583	0.130516
Ppp1r15a	993.299	-0.291214	0.0934497	-3.11626	0.00183158	0.130516
X4933431K23Rik	331.665	0.424106	0.136172	3.1145	0.0018426	0.130516
Kcnj5	5034.94	0.298907	0.0959786	3.11431	0.00184375	0.130516
Tmem171	106.283	-0.708134	0.227556	-3.11191	0.0018588	0.130945
Frmd5	5970.98	-0.44586	0.143495	-3.10714	0.00188908	0.132585
Pik3ip1	3597.76	0.283113	0.0911879	3.10472	0.00190461	0.133182
Atf3	154.702	-0.580083	0.187397	-3.09548	0.00196494	0.136895
Gm43032	108.867	0.621984	0.201055	3.0936	0.00197746	0.137264
X4.Sep	1469.07	-0.24873	0.0805602	-3.0875	0.00201845	0.139597
Mylk	1143.89	-0.22978	0.074538	-3.08271	0.00205122	0.141348
Gm40604	84.4055	0.747706	0.243408	3.07182	0.00212755	0.146077
Pm20d1	714.154	-0.363956	0.118699	-3.0662	0.00216797	0.146913
Whrn	2218.92	0.422439	0.13779	3.06582	0.00217074	0.146913
Strip2	5314.8	0.357459	0.116483	3.06875	0.00214953	0.146913
Gm17705	14.525	1.62712	0.530506	3.06712	0.00216134	0.146913
Tmeff1	435.555	-0.412149	0.13467	-3.06043	0.00221023	0.149053
Tmem163	683.184	0.443284	0.145111	3.05479	0.00225216	0.151342
Mfsd12	449.606	0.381244	0.125101	3.0475	0.00230754	0.154516
Prkcq	236.79	-0.444308	0.14587	-3.04592	0.00231973	0.154785
Gm13339	1515.75	-0.207694	0.0683745	-3.0376	0.00238472	0.158563
Fibin	823.236	0.383645	0.12645	3.03397	0.0024136	0.159922
Hebp1	360.793	-0.466721	0.154048	-3.02972	0.00244783	0.160659
Ypel2	881.727	-0.322676	0.106473	-3.0306	0.00244068	0.160659
Klhl38	839.049	0.359005	0.118545	3.02843	0.00245827	0.160659
Ctnna1	33893	0.21442	0.0708035	3.02839	0.00245863	0.160659
X2900060N12Rik	27.9079	1.18382	0.391317	3.02521	0.00248461	0.161798
Gm3272	11.4363	-2.21379	0.732084	-3.02396	0.00249493	0.161914
Npas2	118.327	-0.697052	0.230649	-3.02213	0.00251	0.162135
Mybphl	2710.94	0.500654	0.165698	3.02148	0.00251545	0.162135
Ptk7	285.215	0.437716	0.145044	3.01782	0.00254604	0.163551
Ppp1r1b	420.951	0.607601	0.20147	3.01584	0.00256273	0.164066
Rps3a1	13404.2	-0.360317	0.119675	-3.01081	0.00260553	0.165687
Rpsa	18461	0.21025	0.0698142	3.01156	0.00259906	0.165687
Ext1	1524.45	0.257137	0.0854458	3.00936	0.00261801	0.165924
Art5	1283.53	0.291152	0.0968457	3.00635	0.00264405	0.166461
Pde4d	982.502	0.271053	0.0901399	3.00702	0.00263821	0.166461
Snca	140.858	-0.910556	0.303633	-2.99887	0.00270986	0.170039
Nhsl1	871.158	0.341643	0.114178	2.99219	0.00276982	0.173228
Pdp1	2566.17	0.197807	0.0661937	2.98831	0.00280522	0.174865
Dvl3	2630	-0.203742	0.0682191	-2.98657	0.00282122	0.175286
Gm14267	140.235	0.497955	0.16688	2.98392	0.00284584	0.175663
Gm16271	12.485	-1.82212	0.610519	-2.98454	0.00284006	0.175663
Bmf	354.215	0.390007	0.130785	2.98205	0.00286326	0.175665
Kremen1	7110.8	-0.273619	0.0917592	-2.98193	0.0028644	0.175665
Ect2l	22.0721	1.96034	0.658768	2.97577	0.00292255	0.178653
Spata17	31.0941	-0.936743	0.315295	-2.971	0.0029683	0.180351
Bcas2	1735.28	-0.257007	0.0865084	-2.97089	0.00296936	0.180351
BC067074	248.15	-0.409395	0.137905	-2.96868	0.00299084	0.181075
Zfp467	440.881	0.323197	0.108999	2.96515	0.00302539	0.182583
Mvp	2770.21	-0.291079	0.0983006	-2.96111	0.00306528	0.184311
Slc43a2	785.338	-0.346582	0.117116	-2.95932	0.00308319	0.184311
Fntb	676.358	0.323757	0.109374	2.9601	0.0030754	0.184311
Stard3	1501.41	0.259317	0.0877202	2.95619	0.00311467	0.185607
Il4ra	652.152	-0.379825	0.128549	-2.95471	0.00312966	0.185915
Gm4070	194.748	0.779554	0.264494	2.94734	0.00320524	0.189366
Ube2o	1885.3	-0.239572	0.0813174	-2.94614	0.00321772	0.189366
Rps6ka2	2877.53	-0.283524	0.0962095	-2.94695	0.00320929	0.189366
AL805899.2	185.597	-0.505467	0.171838	-2.94153	0.00326593	0.19021
Tmem82	895.205	-0.527818	0.179424	-2.94173	0.00326384	0.19021
Rhou	325.43	-0.483835	0.164447	-2.9422	0.00325889	0.19021
Scn4a	2021.78	-0.444219	0.151047	-2.94094	0.00327222	0.19021
Asph	11002.1	0.254053	0.0864591	2.93842	0.00329893	0.191177
Klhl34	239.283	-0.511862	0.174994	-2.92502	0.0034443	0.194254
Sucnr1	13.9463	-1.61205	0.551101	-2.92515	0.00344295	0.194254
Golim4	2308.14	0.197448	0.067421	2.92858	0.00340512	0.194254
Bri3bp	2171.98	-0.218058	0.0745367	-2.92552	0.00343883	0.194254
Rasa4	491.653	-0.409888	0.139979	-2.92821	0.00340924	0.194254
Ano5	86.9379	-0.868652	0.296287	-2.93179	0.00337011	0.194254
Irgm1	1225.73	0.452841	0.154679	2.92763	0.0034156	0.194254
B3gntl1	275.557	0.393041	0.134235	2.92801	0.00341141	0.194254
X1700030C10Rik	26.0585	-1.42937	0.487846	-2.92995	0.00339012	0.194254
Mrps12	1236.82	-0.280712	0.0960025	-2.92401	0.00345558	0.194312
Gm45670	895.169	-0.353656	0.121036	-2.92191	0.00347892	0.19479
Entpd1	912.121	-0.315074	0.10785	-2.9214	0.00348464	0.19479
Slc6a17	475.157	-0.296839	0.101705	-2.91862	0.00351583	0.195956
Adamts7	1968.05	0.320364	0.109984	2.91281	0.00358192	0.198059
Gm12247	28.6106	3.12504	1.07243	2.91398	0.0035685	0.198059
Aspa	181.938	0.472259	0.162146	2.91255	0.00358491	0.198059
AI506816	950.8	0.356919	0.12264	2.91029	0.00361089	0.198914
Nr3c2	1280	0.349569	0.1202	2.90823	0.00363477	0.199649
Arpp19	2751.26	-0.210334	0.0723598	-2.90678	0.00365165	0.199997
Slc46a3	596.572	0.463098	0.159524	2.90299	0.00369618	0.201852
Ptpn3	2958.3	-0.256672	0.0884925	-2.9005	0.00372573	0.202166
Prag1	630.084	-0.307729	0.106121	-2.89981	0.00373394	0.202166
Mlst8	400.617	0.315294	0.108675	2.90125	0.00371681	0.202166
Lrrc30	9.03718	-1.78275	0.615646	-2.89574	0.00378262	0.204219
Inpp4b	2656.82	-0.447583	0.154803	-2.89131	0.00383641	0.206534
Adar	1051.41	0.310535	0.107475	2.88936	0.00386025	0.207229
Gm48732	27.9067	1.19893	0.41568	2.88425	0.00392345	0.210026
Zfp493	67.2562	0.9747	0.338068	2.88315	0.0039372	0.210169
Car14	5258.99	0.266921	0.092667	2.88043	0.00397138	0.211398
Ciart	564.004	1.05332	0.365819	2.87934	0.00398511	0.211535
Gm10033	625.885	0.306794	0.106754	2.87384	0.00405511	0.214649
Negr1	172.867	-0.530982	0.185259	-2.86616	0.00415487	0.218399
Dhx32	2230.41	-0.320925	0.111987	-2.86573	0.00416052	0.218399
Nfe2l1	27080.7	-0.177243	0.0618483	-2.86577	0.00415995	0.218399
Grin3b	113.621	-0.504372	0.176208	-2.86236	0.00420496	0.219515
Gm2606	82.1956	0.916247	0.320085	2.86251	0.00420302	0.219515
Prrt4	169.97	-0.477112	0.166777	-2.86077	0.00422614	0.220014
Idua	1255.58	0.21287	0.0744404	2.85961	0.00424163	0.220216
Mttp	496.622	-0.608215	0.213084	-2.85434	0.00431259	0.223289
Phf19	77.5195	0.660588	0.231582	2.8525	0.00433763	0.223364
Aqp4	361.601	0.443922	0.155601	2.85295	0.00433157	0.223364
Sult6b2	6.13343	2.5137	0.881933	2.85022	0.00436887	0.224363
Atad2	265.269	0.556363	0.195289	2.84893	0.00438669	0.22467
Ccdc9b	2513.56	0.246482	0.0869401	2.83508	0.00458137	0.232348
Col28a1	39.5436	-0.907893	0.320219	-2.83523	0.00457932	0.232348
Mark4	1624.49	-0.202705	0.0714965	-2.83517	0.00458012	0.232348
Pcdhb8	26.8967	1.18635	0.418498	2.83478	0.00458566	0.232348
Ralgps1	507.322	-0.354719	0.125196	-2.8333	0.00460704	0.232809
Fgf2	1210.01	0.300491	0.106116	2.83174	0.0046296	0.233327
Spta1	1436.74	0.216088	0.0763527	2.83013	0.00465298	0.233642
Hap1	155.214	0.601683	0.212638	2.82961	0.00466052	0.233642
Sertm1	46.8959	0.889165	0.314871	2.8239	0.00474431	0.236652
Ifi44	383.919	1.14906	0.407289	2.82125	0.00478364	0.236652
Clcn1	687.809	0.394522	0.139936	2.8193	0.00481285	0.236652
Rras2	2251.63	-0.272166	0.0965113	-2.82004	0.00480175	0.236652
Guk1	2422.38	-0.235778	0.0835665	-2.82145	0.00478075	0.236652
Zfp760	193.313	0.53086	0.1881	2.82222	0.00476919	0.236652
H2.T24	498.24	0.467046	0.165537	2.8214	0.00478144	0.236652
Gm47283	352.187	-0.66527	0.236012	-2.81879	0.00482045	0.236652
S1pr4	54.0628	-0.743326	0.264019	-2.81543	0.00487123	0.238526
Gm19196	80.2413	-0.754407	0.268156	-2.81331	0.00490339	0.239483
Oasl2	1031.4	0.553045	0.196729	2.8112	0.00493564	0.239822
Lca5l	67.0122	0.649895	0.231178	2.81123	0.0049353	0.239822
Olfml3	897.878	0.371139	0.13219	2.80761	0.00499102	0.241892
Gm43379	53.4602	0.710242	0.25324	2.80463	0.00503749	0.243295
Arntl	335.864	-1.45073	0.517511	-2.80329	0.00505848	0.243295
Zbtb20	9903.09	0.223843	0.0798417	2.80359	0.00505379	0.243295
Spire1	349.382	-0.302853	0.108108	-2.8014	0.0050881	0.2441
Tceal8	729.042	0.311977	0.111582	2.79595	0.00517477	0.247592
Cars	978.836	-0.267821	0.0958153	-2.79518	0.00518702	0.247592
Kcna5	945.87	-0.348696	0.124825	-2.79348	0.00521443	0.248275
Mapk10	912.181	0.252761	0.0906324	2.78886	0.00528943	0.250877
Rnf213	2826.5	0.449724	0.161279	2.78848	0.00529556	0.250877
Gm5540	37.306	-0.927768	0.332916	-2.7868	0.0053232	0.251558
Ifi213	158.089	0.723264	0.259927	2.78256	0.00539314	0.25181
Trim54	8206.11	-0.351633	0.126352	-2.78297	0.00538637	0.25181
Mef2c	3043.16	0.230789	0.0829445	2.78245	0.00539497	0.25181
Notch4	1747.07	-0.237349	0.0852334	-2.78469	0.00535789	0.25181
Ablim1	23372.9	-0.2026	0.0728103	-2.78257	0.00539306	0.25181
Gm12381	85.8195	-0.863601	0.311383	-2.77344	0.00554672	0.258256
X2810021J22Rik	177.968	0.428135	0.154479	2.77147	0.00558038	0.25871
Bambi	761.826	0.255035	0.092028	2.77127	0.00558376	0.25871
Stat1	789.336	0.435194	0.157383	2.76519	0.00568904	0.259152
Zfp217	691.05	0.268216	0.0968375	2.76976	0.00560981	0.259152
Fam114a2	2140.54	-0.221217	0.0799234	-2.76787	0.00564248	0.259152
Arl4d	792.415	0.271491	0.0981788	2.76527	0.0056876	0.259152
Plpp1	1774.24	-0.239645	0.0866542	-2.76553	0.00568309	0.259152
Pcdhgb8	141.721	0.490303	0.177312	2.7652	0.00568882	0.259152
Cox8a	4081.73	0.186266	0.0672771	2.76864	0.00562906	0.259152
Tspyl5	398.428	0.31385	0.113609	2.76255	0.00573522	0.260629
Prkab2	2675.56	-0.24994	0.0905499	-2.76025	0.0057758	0.261626
Tcaf1	915.257	0.244818	0.0887106	2.75974	0.00578477	0.261626
Gm16907	80.0259	-0.970367	0.352482	-2.75295	0.00590601	0.266474
Cyp2j6	341.054	-0.382096	0.139007	-2.74876	0.00598205	0.266729
Eif2b3	607.305	-0.3321	0.120745	-2.75043	0.00595174	0.266729
Rnase1	15.3072	-1.54992	0.563756	-2.74926	0.00597292	0.266729
Nfil3	368.582	-0.363142	0.132036	-2.75033	0.00595349	0.266729
Cyp1b1	507.52	-0.58582	0.213073	-2.74939	0.00597065	0.266729
Tcf19	131.873	0.47791	0.173994	2.74671	0.00601959	0.267773
Mecom	763.682	0.231584	0.0843521	2.74544	0.00604289	0.26818
AC154760.1	98.467	0.65663	0.239665	2.73978	0.00614794	0.272204
Picalm	6941.25	-0.237375	0.0867223	-2.73719	0.00619674	0.273725
Arhgap26	2551.95	0.189358	0.0692476	2.73451	0.00624726	0.275315
Zfp383	643.062	0.282339	0.103294	2.73335	0.00626932	0.275646
Frem1	24.7325	1.09635	0.401531	2.73042	0.0063254	0.277108
Elp6	87.2403	0.619121	0.226777	2.73008	0.00633181	0.277108
Rasgrp3	1640.58	-0.21398	0.0784016	-2.72928	0.00634731	0.277146
X4632404M16Rik	237.356	-0.495434	0.181685	-2.72689	0.00639346	0.27852
Wipf3	2169.6	0.287196	0.105511	2.72196	0.00648958	0.282059
Fam89a	61.3274	-0.618684	0.227567	-2.71869	0.00655417	0.284214
Creg1	6553.86	-0.256673	0.094592	-2.71347	0.00665816	0.287408
Smc4	1125	0.23436	0.0863541	2.71394	0.00664877	0.287408
Irak2	356.886	-0.29713	0.109572	-2.71173	0.00669322	0.288265
Igsf1	705.101	-0.517694	0.191036	-2.70992	0.00672989	0.288782
Riiad1	17.3413	-1.1557	0.426517	-2.70964	0.0067357	0.288782
Enkur	61.3649	-0.730648	0.270131	-2.7048	0.00683465	0.290396
Gm10073	243.897	0.385061	0.142362	2.7048	0.00683445	0.290396
Gm48295	49.3035	0.822701	0.30403	2.70599	0.00681015	0.290396
Kank3	2717.29	-0.27825	0.102864	-2.70502	0.00682996	0.290396
Dhrs3	2791.19	-0.23228	0.0859769	-2.70166	0.00689952	0.292111
Psap	73582.8	-0.167286	0.0619267	-2.70135	0.00690584	0.292111
Tent5c	103.724	-0.565466	0.209413	-2.70024	0.00692887	0.292432
Ankrd44	617.233	-0.345255	0.128018	-2.69693	0.00699818	0.294061
Slc26a7	33.3403	0.845767	0.313605	2.69692	0.00699851	0.294061
Usp2	6127.66	0.283292	0.1051	2.69545	0.00702944	0.294708
Errfi1	815.172	-0.498814	0.185143	-2.69421	0.00705562	0.295152
Trac	52.6192	0.860147	0.319499	2.69217	0.00709884	0.296306
Gm9761	40.9073	-0.911256	0.338884	-2.68899	0.00716686	0.298473
Ptdss1	2191.42	-0.269974	0.100427	-2.68827	0.00718226	0.298473
Galt	1118.24	-0.268435	0.0999476	-2.68575	0.00723662	0.300074
Gm40457	66.2163	-1.11863	0.416676	-2.68464	0.00726077	0.300418
Aqp1	14191.9	-0.323259	0.120539	-2.68179	0.00732299	0.302333
G530011O06Rik	48.4224	-0.923196	0.344587	-2.67914	0.00738112	0.30407
Cadm4	1096.14	-0.347613	0.12992	-2.6756	0.00745952	0.306633
Cdk2	698.69	0.275703	0.103081	2.67461	0.00748165	0.306877
Miga2	3344.89	-0.218465	0.0818002	-2.67071	0.00756899	0.307322
Kirrel	800.492	-0.284728	0.106522	-2.67296	0.00751844	0.307322
Gm10382	54.9951	-0.990708	0.370815	-2.6717	0.00754672	0.307322
Mtss1l	1522.02	-0.236856	0.088693	-2.67051	0.00757358	0.307322
Dll1	209.492	-0.365665	0.136867	-2.67167	0.00754743	0.307322
Ly75	98.6499	0.641647	0.240438	2.66866	0.00761548	0.307346
Scube2	651.261	-0.326036	0.122181	-2.66847	0.00761986	0.307346
Btg1	1713.23	0.21361	0.0800536	2.66833	0.00762283	0.307346
Ccdc163	207.301	0.39866	0.149445	2.6676	0.00763951	0.307364
Cenpf	1547.84	0.455853	0.17095	2.66659	0.00766244	0.307634
Egf	481.621	-0.352928	0.132424	-2.66514	0.0076956	0.308272
Letm2	454.576	0.271986	0.102104	2.66382	0.00772593	0.308272
Carns1	1908.36	0.274163	0.102923	2.66377	0.00772715	0.308272
mt.Atp8	7507.97	0.445743	0.167505	2.66108	0.00778905	0.310089
Nrtn	1228.76	0.269252	0.101263	2.65893	0.00783894	0.311421
Ppp1r3c	4469.85	-0.306715	0.115482	-2.65596	0.00790831	0.31352
Fign	444.739	0.397492	0.149767	2.65407	0.00795284	0.31371
Sod3	1861.33	-0.286233	0.107845	-2.65413	0.00795141	0.31371
Rnf144a	838.327	-0.404533	0.152444	-2.65364	0.00796277	0.31371
Slc10a6	162.481	-0.65044	0.245229	-2.65238	0.00799261	0.314232
Pnck	417.37	-0.271423	0.102448	-2.64936	0.0080645	0.315749
Ankrd35	128.483	-0.483424	0.182433	-2.64987	0.00805226	0.315749
Ugp2	11286.3	-0.195821	0.0740204	-2.6455	0.00815709	0.318715
Cdkl5	391.415	0.317182	0.119957	2.64412	0.00819029	0.319354
Txnrd1	2988.29	-0.250596	0.0949153	-2.64021	0.00828551	0.322403
Adamts4	36.2703	-1.02347	0.387964	-2.63806	0.00833821	0.323127
Clint1	3307.44	-0.23066	0.0874262	-2.63834	0.0083314	0.323127
Rusc2	2709.71	-0.203394	0.0772008	-2.63461	0.00842334	0.32576
Cacnb2	3793.46	0.303584	0.115306	2.63286	0.00846695	0.326779
Bag2	1537.26	-0.196214	0.074572	-2.63121	0.00850823	0.32684
Ncam1	208.857	0.40086	0.152313	2.63182	0.00849288	0.32684
Slc38a1	1156.33	0.242868	0.0923196	2.63073	0.00852027	0.32684
Rnf115	1061.56	-0.263106	0.100111	-2.62814	0.00858521	0.328666
X1700025G04Rik	2144.21	0.231492	0.0881407	2.62639	0.00862947	0.329694
Gm42547	127.975	0.480452	0.183038	2.62488	0.00866795	0.330498
Thbs1	375.248	-0.343548	0.131035	-2.6218	0.00874671	0.330839
Cabp1	277.104	-0.324086	0.123592	-2.62222	0.00873584	0.330839
Gm43909	29.8607	1.11252	0.424319	2.62189	0.00874443	0.330839
Rtn4rl1	430.901	0.320546	0.122172	2.62373	0.00869734	0.330839
Nuf2	27.0765	1.41089	0.538523	2.61992	0.00879503	0.332004
Lin52	614.393	0.288497	0.110165	2.61878	0.0088245	0.332454
Gm26795	446.691	0.358897	0.137089	2.61799	0.00884494	0.332563
Zfp521	888.765	0.272751	0.104287	2.6154	0.00891234	0.334433
Patj	1211.38	-0.310764	0.119072	-2.60989	0.00905707	0.338524
Cyp4b1	1356.98	0.200529	0.0768265	2.61016	0.00905008	0.338524
Ap1b1	3308.85	-0.220733	0.0846744	-2.60684	0.00913812	0.340881
Pam	65620.8	0.185947	0.0715213	2.59989	0.00932549	0.346506
Scaf8	1687.41	-0.212044	0.0815409	-2.60046	0.0093098	0.346506
Ltbp1	2828.36	0.245121	0.0943759	2.59728	0.00939646	0.34846
Camk1g	64.9777	0.625727	0.241167	2.59458	0.00947075	0.349165
Tfpi	4501.68	0.213492	0.0822675	2.5951	0.0094564	0.349165
Kif16b	3106.4	-0.185567	0.0715163	-2.59475	0.00946587	0.349165
Trappc6a	647.277	0.481578	0.185888	2.59069	0.00957838	0.352447
Lpl	224095	-0.268097	0.10355	-2.58907	0.00962364	0.353165
Klf12	665.359	0.231894	0.0895808	2.58865	0.00963516	0.353165
Tfap4	185.123	0.436626	0.168714	2.58796	0.00965454	0.353192
Gbp5	818.71	0.510202	0.197527	2.58295	0.00979589	0.357673
Slc6a8	10064.5	-0.216604	0.0839068	-2.58148	0.00983782	0.357825
Il34	137.569	-0.418551	0.162124	-2.58167	0.00983245	0.357825
Rnf144b	1128.78	-0.268941	0.104335	-2.57767	0.00994701	0.361047
Cldn5	762.066	-0.417546	0.162024	-2.57706	0.00996451	0.361047
Thap6	312.051	0.323605	0.125756	2.57327	0.0100744	0.363966
Gm5977	7.70094	1.89262	0.735583	2.57295	0.0100835	0.363966
Cacnb1	381.193	-0.322607	0.125454	-2.57151	0.0101257	0.364795
Mboat2	574.448	0.842566	0.327962	2.5691	0.0101964	0.366644
Hist1h2al	27.1971	5.47245	2.13092	2.56812	0.0102252	0.366983
Hjurp	1997.63	0.245454	0.095776	2.56279	0.0103834	0.367557
Manea	985.236	0.253397	0.0987398	2.56631	0.0102786	0.367557
Mroh7	28.3934	0.905742	0.353177	2.56455	0.0103308	0.367557
Lzic	1162.46	-0.240461	0.0937339	-2.56536	0.010307	0.367557
X2210408F21Rik	594.768	-0.254783	0.099433	-2.56236	0.0103963	0.367557
Akr1b10	2072.78	0.224066	0.0873849	2.56413	0.0103434	0.367557
Gfpt2	783.498	-0.273194	0.106576	-2.56337	0.0103661	0.367557
Angpt1	2585.43	0.354365	0.138219	2.5638	0.0103534	0.367557
Gab1	3450.49	0.210058	0.0821545	2.55687	0.0105619	0.372716
Smim20	2428.89	0.181748	0.0711041	2.55609	0.0105857	0.372859
AW549877	2774.19	0.189298	0.0740807	2.5553	0.0106096	0.373011
Stk32b	79.9193	0.585132	0.229117	2.55386	0.0106537	0.373867
Zfp950	1067.54	0.208562	0.0817894	2.54999	0.0107728	0.377345
Gpr22	2027.53	0.288451	0.113155	2.54917	0.0107979	0.377529
X2410137M14Rik	20.5312	-1.17703	0.462023	-2.54755	0.0108483	0.37859
Ier3	1277.13	0.40112	0.157644	2.54447	0.0109443	0.38124
Erc1	2184.08	0.255517	0.100625	2.53931	0.0111072	0.385608
Ces1f	51.7153	-1.07889	0.424891	-2.53921	0.0111104	0.385608
Nos1ap	271.949	0.325768	0.128342	2.53828	0.0111398	0.38592
Herc6	273.797	0.518981	0.204622	2.5363	0.0112032	0.387013
Dennd3	587.859	-0.293718	0.115819	-2.53602	0.0112121	0.387013
Slc2a4rg.ps	272.933	0.421038	0.16636	2.53088	0.0113777	0.387086
Dph5	236.656	-0.360798	0.142517	-2.53162	0.0113538	0.387086
Mkrn1	1426.42	-0.27814	0.10977	-2.53383	0.0112824	0.387086
Ckap4	1229.14	-0.276938	0.109326	-2.53313	0.0113049	0.387086
Gm10313	8.22289	2.05599	0.812298	2.53108	0.0113713	0.387086
Nptn	4819.06	0.185173	0.0731434	2.53164	0.011353	0.387086
Itgb3	150.66	-0.414408	0.163665	-2.53205	0.0113399	0.387086
Gm6969	68.4667	-0.626008	0.247341	-2.53095	0.0113753	0.387086
Ppat	1492.12	0.246544	0.0975307	2.52786	0.011476	0.38973
Oplah	3769.98	-0.263807	0.104461	-2.5254	0.0115566	0.391766
Gm26852	26.4858	0.885187	0.350732	2.52383	0.0116085	0.392824
Smpx	8539.89	0.210153	0.0833268	2.52204	0.0116677	0.394122
Pbk	22.7577	1.55381	0.616326	2.52108	0.0116995	0.394492
A930028N01Rik	111.602	-0.55066	0.218615	-2.51886	0.0117735	0.396282
Gm45495	236.752	0.546914	0.217304	2.51682	0.0118419	0.397881
Plxna3	98.5563	0.509142	0.202582	2.51326	0.011962	0.399083
C1s1	1686.67	-0.227434	0.0904799	-2.51364	0.0119491	0.399083
Snai3	138.726	0.850567	0.338403	2.51348	0.0119548	0.399083
Krt222	1017.58	-0.374317	0.148875	-2.51431	0.0119264	0.399083
Mtx3	1033.93	0.202898	0.0807708	2.51203	0.012004	0.399781
Slc25a33	916.706	0.251644	0.10032	2.50842	0.0121271	0.401069
Pde1c	2840.86	0.308407	0.122949	2.50842	0.0121273	0.401069
Gm5113	863.463	0.221913	0.0884159	2.50987	0.0120775	0.401069
Dnajc27	737.717	-0.22699	0.0904874	-2.50852	0.0121237	0.401069
Map3k2	1077.49	0.230272	0.0918224	2.5078	0.0121486	0.401072
Kntc1	27.2871	1.6955	0.677001	2.50443	0.0122648	0.401919
Orai2	103.749	-0.521881	0.208448	-2.50365	0.0122919	0.401919
Blvrb	553.256	0.490525	0.195993	2.50277	0.0123227	0.401919
Atp5d	21904.8	0.165653	0.0660928	2.50638	0.0121976	0.401919
Dhx58	168.44	0.610354	0.243833	2.50317	0.0123087	0.401919
Bahcc1	1063.08	0.226064	0.0902778	2.50409	0.0122767	0.401919
E030044B06Rik	40.729	0.766894	0.306186	2.50467	0.0122565	0.401919
Rasa1	2017.53	0.17713	0.0708207	2.5011	0.0123807	0.403119
Gm19410	127.001	-0.526232	0.210476	-2.50019	0.0124125	0.40346
Pask	37.0205	0.81211	0.325778	2.49283	0.012673	0.404948
Gal3st2c	357.86	0.409399	0.164498	2.48878	0.0128183	0.404948
Zc3h15	2421.73	-0.221294	0.0888724	-2.49002	0.0127736	0.404948
Stk35	1327.41	0.258601	0.103749	2.49257	0.0126823	0.404948
Slc1a7	76.889	0.700336	0.280941	2.49283	0.0126731	0.404948
Rab3b	124.845	0.497012	0.199674	2.48912	0.0128061	0.404948
Zfp691	782.919	0.221405	0.0889728	2.48845	0.01283	0.404948
Fgfr3	518.476	-0.35999	0.144193	-2.49658	0.0125398	0.404948
Cyth3	2253.89	-0.213645	0.0858551	-2.48844	0.0128305	0.404948
Fam3c	1153.69	-0.20686	0.0830472	-2.49088	0.0127429	0.404948
Ssu2	138.343	-0.476577	0.191541	-2.48813	0.0128418	0.404948
Zmym2	2005.92	0.204674	0.0822168	2.48944	0.0127945	0.404948
Elovl7	35.801	-1.55745	0.625854	-2.48852	0.0128275	0.404948
Rps3a3	632.912	2.47077	0.992832	2.48861	0.0128244	0.404948
Slc45a4	1176.79	0.21782	0.0873204	2.4945	0.0126136	0.404948
Alcam	181.617	0.396589	0.159323	2.48921	0.0128027	0.404948
Tnfrsf21	568.311	-0.231306	0.0929652	-2.4881	0.0128429	0.404948
Setbp1	858.455	0.246508	0.0990681	2.48826	0.0128368	0.404948
Ccdc122	74.6757	-0.570964	0.229601	-2.48676	0.0128912	0.405682
Ripor2	367.916	-0.445102	0.179024	-2.48627	0.012909	0.405682
Adamtsl4	3026	0.176925	0.0712756	2.48227	0.0130548	0.407561
Tmem11	1700.01	-0.228324	0.0919215	-2.4839	0.0129951	0.407561
Slf1	1555.2	-0.19308	0.0777625	-2.48294	0.0130302	0.407561
Gm9522	67.0433	2.17173	0.874722	2.48277	0.0130367	0.407561
Pnrc1	3855.74	-0.217201	0.0875898	-2.47975	0.0131474	0.408432
Gm12409	26.5958	0.95795	0.386249	2.48013	0.0131334	0.408432
Idh3a	31120	0.141065	0.0568712	2.48044	0.0131222	0.408432
Sorcs2	1228.8	0.251647	0.101587	2.47716	0.0132434	0.41074
Slc9a3r2	4919.22	-0.223683	0.0903327	-2.47621	0.0132786	0.41116
Adnp	191.818	0.546865	0.221107	2.47331	0.0133869	0.413011
Usp18	231.214	0.571086	0.230957	2.47269	0.0134101	0.413011
Gm11716	455.264	0.321854	0.130164	2.47269	0.0134102	0.413011
Bbx	826.605	0.213675	0.0864488	2.4717	0.0134474	0.413011
Pcdhb3	25.0468	0.97529	0.394563	2.47183	0.0134425	0.413011
Fam117b	883.817	-0.278807	0.112845	-2.47071	0.0134846	0.413485
Alx4	21.2546	-1.12398	0.455875	-2.46555	0.0136803	0.415452
C5ar1	159.505	-0.44687	0.181219	-2.46591	0.0136666	0.415452
Ldhd	2730.75	-0.223607	0.0906314	-2.46722	0.0136168	0.415452
Gm10076	1213.4	0.24017	0.0973791	2.46634	0.0136502	0.415452
Casp4	152.533	0.383824	0.155564	2.4673	0.0136136	0.415452
Gm4076	2195.87	-0.36685	0.148657	-2.46776	0.0135963	0.415452
Clock	2046.93	-0.340435	0.138242	-2.4626	0.0137935	0.418218
Dab2ip	3435.97	-0.176096	0.0715601	-2.46081	0.0138623	0.419634
Tmem150c	292.51	-0.473228	0.192418	-2.45937	0.0139181	0.42065
Gemin7	875.725	-0.217602	0.0885077	-2.45857	0.0139491	0.420918
Six1	125.03	-0.516618	0.210197	-2.45778	0.0139797	0.42117
Stat2	1399.82	0.432968	0.176259	2.45643	0.0140325	0.422064
Stxbp4	361.651	0.331783	0.135097	2.45588	0.014054	0.422064
Proser3	163.588	0.391963	0.159677	2.45472	0.0140993	0.422757
Cys1	286.262	0.444595	0.18133	2.45186	0.0142119	0.424787
Vldlr	20298.3	-0.304036	0.123988	-2.45215	0.0142006	0.424787
Smim5	597.547	0.330137	0.134809	2.44891	0.0143288	0.426934
X9530082P21Rik	307.157	0.419737	0.171396	2.44894	0.0143279	0.426934
Fgf16	997.292	0.345884	0.14144	2.44544	0.0144676	0.428576
F3	1143.69	0.300812	0.123075	2.44415	0.0145196	0.428576
Eif4g3	3172.3	-0.189093	0.0772889	-2.44657	0.0144223	0.428576
Prmt7	1592.1	-0.188809	0.0772422	-2.44438	0.0145103	0.428576
Tbcel	1236.87	-0.224937	0.0919579	-2.44608	0.0144417	0.428576
Mocos	292.387	-0.420748	0.172089	-2.44494	0.0144878	0.428576
Fam228b	111.936	-0.503407	0.206047	-2.44316	0.0145591	0.429076
Tspyl4	576.055	0.261311	0.107014	2.44185	0.0146122	0.429969
Rasef	87.0086	-0.707831	0.29014	-2.43961	0.0147029	0.43197
Ccdc158	10.7103	-1.42174	0.583308	-2.43737	0.0147946	0.433319
Gm47251	26.1308	-0.926951	0.380276	-2.43757	0.0147862	0.433319
Fcamr	39.6047	0.830195	0.340879	2.43545	0.0148731	0.433913
C530008M17Rik	318.824	0.383878	0.157765	2.43322	0.0149652	0.433913
Gm15697	6.77818	1.88477	0.774851	2.43243	0.0149981	0.433913
Mical3	3367.16	-0.188198	0.0773433	-2.43328	0.0149629	0.433913
Pvr	1438.28	-0.211729	0.0869521	-2.43501	0.0148914	0.433913
Saraf	12806.3	-0.266196	0.109424	-2.43271	0.0149863	0.433913
Adap2	432.44	-0.302269	0.124114	-2.43541	0.0148749	0.433913
Zfp729a	383.099	0.271833	0.111665	2.43436	0.0149181	0.433913
Asb16	68.8307	-0.579805	0.238439	-2.43167	0.0150292	0.434113
Flvcr2	302.673	0.32805	0.134936	2.43116	0.0150508	0.434113
Frmd4a	1642.39	0.264832	0.109081	2.42785	0.0151885	0.436095
Katnbl1	234.095	-0.312978	0.128901	-2.42806	0.0151799	0.436095
Samm50	11071.5	-0.183012	0.0753667	-2.42829	0.0151702	0.436095
Fbxo30	1287.89	-0.217358	0.0896141	-2.42549	0.0152879	0.438284
Il1rl2	166.638	0.403216	0.166331	2.42418	0.0153429	0.439196
Slc22a23	789.509	0.247515	0.102155	2.42292	0.0153961	0.440055
Dusp18	2629.16	-0.303557	0.125363	-2.42143	0.0154597	0.441206
Med16	2383.96	-0.172768	0.07137	-2.42074	0.0154889	0.441376
Phyhd1	182.445	-0.397384	0.164242	-2.41951	0.0155415	0.441546
Limch1	12473.8	0.15948	0.065909	2.4197	0.0155333	0.441546
Mical1	623.969	-0.348781	0.144216	-2.41846	0.0155864	0.442159
Fam131c	35.3871	-1.40279	0.58061	-2.41606	0.0156896	0.443206
BC043934	87.1721	0.491728	0.203457	2.41686	0.015655	0.443206
Nedd9	833.559	-0.326333	0.135073	-2.41597	0.0156935	0.443206
Rtl8a	765.866	0.280772	0.11628	2.41462	0.0157517	0.44419
Gm7694	499.951	0.267813	0.111056	2.41151	0.0158866	0.445376
Gm13943	130.647	-0.459749	0.190539	-2.41288	0.0158269	0.445376
Rin3	629.28	-0.235547	0.0976774	-2.41148	0.0158878	0.445376
Fech	6405.9	-0.158046	0.0655232	-2.41207	0.0158624	0.445376
Kansl1l	1217.13	0.194773	0.080858	2.40883	0.0160038	0.445516
Arhgef11	1383.73	-0.19109	0.0793517	-2.40814	0.0160339	0.445516
Myh14	7775.76	-0.342043	0.14203	-2.40825	0.0160293	0.445516
Akap1	8157.58	-0.228841	0.094968	-2.40967	0.0159671	0.445516
Adcy5	5916.04	0.25354	0.105234	2.40931	0.0159827	0.445516
Mir99ahg	445.849	0.250605	0.103991	2.40987	0.0159582	0.445516
Uaca	3520.34	-0.196441	0.081618	-2.40683	0.0160916	0.445812
Rbm20	12299.4	0.218207	0.090648	2.40719	0.0160759	0.445812
Coq8a	29961.9	-0.201841	0.0839441	-2.40447	0.0161959	0.446742
Gm42743	13.4906	6.01502	2.50134	2.40472	0.0161848	0.446742
Psip1	1389.41	0.195605	0.0813172	2.40546	0.0161521	0.446742
Gm15469	56.7839	-0.715946	0.297822	-2.40394	0.0162195	0.446743
Cryl1	254.649	-0.309177	0.128703	-2.40226	0.016294	0.448145
Zfp940	65.8933	0.598384	0.249242	2.40082	0.0163586	0.448404
Ptpre	309.711	-0.307661	0.128167	-2.40046	0.0163744	0.448404
Bcl11b	123.606	0.680764	0.283504	2.40125	0.0163392	0.448404
Acacb	21073.3	-0.24424	0.101827	-2.39857	0.0164591	0.449424
Notch3	2488.48	-0.212193	0.0884638	-2.39864	0.016456	0.449424
Pacsin2	11184.4	-0.202358	0.0844749	-2.39548	0.0165988	0.451525
Myh11	1600.6	-0.215617	0.0899981	-2.3958	0.0165842	0.451525
Pcdhb6	11.4901	1.40446	0.586344	2.39528	0.0166075	0.451525
X6430590A07Rik	39.0535	0.825751	0.344955	2.39379	0.0166752	0.452715
Anxa5	4508.4	-0.1738	0.0726361	-2.39276	0.0167224	0.453344
Fbp2	1222.6	-0.346247	0.144738	-2.39223	0.0167462	0.453344
Fam124a	358.522	-0.375573	0.157083	-2.39092	0.0168064	0.454324
Bend5	293.941	-0.396476	0.165933	-2.38937	0.0168772	0.454733
Gkn3	27.6861	1.02776	0.430064	2.38977	0.0168587	0.454733
Lrrc3b	913.895	0.28654	0.119941	2.38902	0.0168935	0.454733
Gm14261	154.65	-0.446695	0.187077	-2.38776	0.0169513	0.455333
Selenbp2	76.6008	1.06009	0.444555	2.38461	0.0170974	0.455333
Ankrd34a	141.273	0.451686	0.189311	2.38594	0.0170355	0.455333
Rsrp1	16157.3	0.148208	0.0621079	2.38629	0.0170192	0.455333
Zfp61	164.051	0.38177	0.16011	2.38442	0.0171062	0.455333
AC133498.1	347.641	-0.358006	0.150146	-2.38438	0.017108	0.455333
Rbfox2	3877.1	0.172375	0.0722191	2.38683	0.0169942	0.455333
Tmem44	643.536	-0.237721	0.0996616	-2.38528	0.017066	0.455333
Cited4	755.142	-0.280595	0.117722	-2.38355	0.0171468	0.455724
Gng2	505.689	0.31272	0.131315	2.38146	0.0172442	0.457671
Eya2	74.8566	-0.671761	0.28274	-2.3759	0.0175064	0.459483
Acp6	1448.39	0.220239	0.0926757	2.37645	0.01748	0.459483
Trim12c	746.188	0.316849	0.133342	2.37621	0.0174915	0.459483
Lhpp	631.129	-0.238414	0.1003	-2.37701	0.0174536	0.459483
Klhl33	2314.25	0.269396	0.113333	2.37704	0.0174521	0.459483
Dhrs4	3747.15	-0.177103	0.0745384	-2.376	0.0175015	0.459483
Islr2	93.5471	-0.573383	0.241213	-2.37707	0.0174505	0.459483
Gm17753	39.5828	0.803568	0.337958	2.37772	0.0174202	0.459483
Ftsj3	1538.15	-0.206455	0.0869609	-2.37412	0.017591	0.460634
Gm11734	203.929	0.343628	0.144749	2.37395	0.0175989	0.460634
Arid5a	322.625	-0.425201	0.179289	-2.3716	0.0177114	0.462772
Il6ra	302.852	-0.39669	0.167294	-2.37122	0.0177294	0.462772
Dnajc11	2805.07	-0.169189	0.0713682	-2.37065	0.0177569	0.462851
Ttll7	534.921	-0.455795	0.192379	-2.36926	0.0178237	0.463954
Gm45527	31.2229	0.773032	0.326408	2.3683	0.0178702	0.464526
Gm12319	266.765	0.42367	0.179054	2.36617	0.0179734	0.465931
Psmd2	11276.6	-0.180678	0.0763436	-2.36665	0.0179501	0.465931
Nbeal2	1127.85	-0.183247	0.0774765	-2.3652	0.0180205	0.466515
Zfp983	188.9	0.415389	0.175736	2.36372	0.0180926	0.467742
Clec14a	1213.07	0.246859	0.104475	2.36285	0.018135	0.467843
Rhoj	1462.14	-0.294476	0.124639	-2.36263	0.0181459	0.467843
Dnajc5	4068.46	-0.143478	0.0607492	-2.36181	0.018186	0.46824
Ly6e	7286.97	0.267767	0.113441	2.3604	0.0182552	0.469385
Lrrc17	239.848	0.527063	0.223392	2.35936	0.0183065	0.469428
Fmnl1	1117.18	-0.229272	0.0971737	-2.3594	0.0183044	0.469428
Mypn	6624.49	-0.206403	0.0876606	-2.35457	0.0185442	0.474881
Myl12a	10040.4	-0.306633	0.130271	-2.3538	0.0185826	0.475223
Ppfia1	2357.53	-0.286709	0.121941	-2.35122	0.0187119	0.477885
Cd8a	19.9952	1.28804	0.547958	2.35062	0.0187422	0.478014
Inka2	1348.39	0.304915	0.12976	2.34984	0.0187813	0.478368
Ly6a	3541.03	0.262594	0.111839	2.34797	0.0188762	0.480138
Sae1	1693.89	0.314269	0.13388	2.3474	0.0189051	0.48023
Gm29667	13.748	-1.99537	0.850424	-2.34632	0.0189597	0.480972
Otud3	480.685	-0.2275	0.0970542	-2.34405	0.0190755	0.481994
Psme1	4834.7	0.200455	0.0855168	2.34404	0.0190763	0.481994
Ldlr	332.342	0.39962	0.17044	2.34464	0.0190453	0.481994
Gm15931	38.172	0.832167	0.355129	2.34328	0.0191151	0.482331
Pbx1	2796.43	0.14312	0.0610984	2.34246	0.0191572	0.482752
Stom	6263.48	-0.192242	0.082099	-2.34159	0.0192018	0.482945
Cep164	581.335	0.239474	0.102303	2.34082	0.0192413	0.482945
Vps37c	1154.73	-0.186962	0.0798587	-2.34116	0.0192239	0.482945
Gm11407	1139.36	-0.358662	0.15331	-2.33946	0.0193116	0.484068
Pcdhb14	133.358	-0.434741	0.185953	-2.33791	0.0193919	0.485437
X4930412M03Rik	8.98971	-1.43431	0.613998	-2.33601	0.0194908	0.48727
Eif3a	10693.3	-0.216105	0.0925385	-2.3353	0.0195275	0.487545
Ppp2r3a	17328.1	0.1455	0.0623431	2.33386	0.0196033	0.488792
B4galt1	3426.01	-0.201978	0.0866284	-2.33155	0.0197245	0.491169
Siglec1	427.138	0.45154	0.193737	2.33069	0.0197697	0.491647
Sash1	1795.46	-0.21063	0.0904132	-2.32963	0.0198255	0.492388
Ddx60	355.934	0.350747	0.1507	2.32745	0.0199411	0.494613
Rfx8	13.3229	-1.18382	0.508896	-2.32625	0.0200054	0.494911
AC130815.2	100.939	-0.51203	0.220099	-2.32636	0.0199992	0.494911
Tesk2	128.526	0.405213	0.17434	2.32426	0.0201114	0.496885
Plxnb3	263.734	0.32468	0.139778	2.32283	0.0201885	0.498025
Ap1s2	1576	0.18173	0.0782526	2.32235	0.0202139	0.498025
Arfgef3	28.1733	0.848239	0.365392	2.32145	0.0202626	0.498025
Coro2b	562.108	-0.239544	0.103184	-2.32152	0.0202591	0.498025
Ell2	841.55	-0.245476	0.105849	-2.3191	0.0203894	0.50049
Opn4	184.822	0.470036	0.20292	2.31636	0.0205387	0.503503
Thumpd3	673.539	-0.237951	0.102774	-2.31527	0.020598	0.504285
Alpk2	8218.02	-0.232724	0.100537	-2.3148	0.0206238	0.504285
Rgma	1899.85	0.299927	0.129626	2.31378	0.0206798	0.504705
Sprtn	903.672	-0.217172	0.0938709	-2.31352	0.0206943	0.504705
Phf11d	584.14	0.414425	0.179491	2.30889	0.0209497	0.509623
Cyp4f14	13.8461	-1.20074	0.519973	-2.30923	0.0209306	0.509623
Pdss2	1394.15	0.171532	0.0743812	2.30611	0.0211043	0.512069
Gramd1c	81.4597	0.4721	0.204678	2.30654	0.0210802	0.512069
Gm20554	15.7269	1.12484	0.488112	2.30447	0.0211965	0.51365
Cdc42ep3	1337.55	0.222956	0.096795	2.30339	0.0212571	0.51446
Myoc	409.894	-0.431529	0.187516	-2.3013	0.0213748	0.514515
Fam53a	1171.94	-0.175959	0.0765045	-2.29998	0.0214494	0.514515
Il9r	10.8567	-1.80122	0.782979	-2.30047	0.0214219	0.514515
Ccl7	51.4144	0.673413	0.292484	2.3024	0.0213127	0.514515
Gm11512	16.3331	1.19965	0.521585	2.30001	0.0214478	0.514515
Ccdc184	46.4637	0.651707	0.28325	2.30082	0.0214017	0.514515
Smco1	646.187	0.263191	0.114389	2.30084	0.0214004	0.514515
Gm48667	7.28986	1.79739	0.782317	2.29752	0.0215889	0.517205
Ninj1	2197.69	-0.264885	0.115377	-2.29583	0.0216857	0.518869
Serpine2	1035.38	0.191857	0.0836289	2.29415	0.021782	0.51986
Uba7	1441.76	0.303422	0.132252	2.29428	0.0217747	0.51986
S100a16	1430.99	-0.235556	0.102744	-2.29265	0.0218682	0.519953
Rnf157	382.3	-0.362059	0.157901	-2.29295	0.0218512	0.519953
Gda	831.735	-0.216514	0.0944303	-2.29284	0.0218571	0.519953
Fras1	205.185	0.48215	0.210446	2.29109	0.0219584	0.521443
Isoc2a	2564.37	-0.189252	0.0826218	-2.29058	0.0219878	0.521488
Gm20300	1040.64	0.19952	0.0871301	2.28991	0.0220265	0.521752
Poln	113.339	-0.493545	0.215673	-2.2884	0.0221144	0.522461
Slc7a1	3142.39	0.209916	0.0917666	2.2875	0.0221667	0.522461
Gjc2	58.8159	-0.570462	0.249356	-2.28774	0.0221527	0.522461
Xaf1	590.072	0.454841	0.198814	2.28777	0.0221509	0.522461
Rgn	26.5136	-0.943835	0.412966	-2.2855	0.0222833	0.522552
Bsg	56349.2	-0.203623	0.0890654	-2.28622	0.0222414	0.522552
X1500009L16Rik	80.0803	-0.525577	0.230082	-2.2843	0.0223539	0.522552
Insr	6827.47	-0.317144	0.138798	-2.28493	0.022317	0.522552
Kctd19	11.0063	-1.35163	0.591776	-2.28402	0.0223702	0.522552
X3110039I08Rik	564.058	0.230055	0.100711	2.28431	0.0223534	0.522552
Ccdc85a	760.921	-0.421771	0.18453	-2.28565	0.0222747	0.522552
Ahrr	281.604	0.367692	0.161009	2.28367	0.0223912	0.522552
Etv1	790.508	0.235761	0.10332	2.28186	0.0224977	0.524393
Vwc2	77.5285	0.502455	0.22042	2.27953	0.0226354	0.526822
Tmx1	3192.66	-0.204768	0.0898435	-2.27916	0.0226575	0.526822
Helb	713.46	0.262858	0.115386	2.27807	0.0227225	0.527685
Gm15708	34.8275	0.73053	0.320778	2.27737	0.0227643	0.52801
Naa25	1341.33	-0.239994	0.105473	-2.27542	0.0228808	0.528125
Gm6054	22.8246	-0.924898	0.406464	-2.27547	0.0228776	0.528125
Hif3a	103.605	0.638131	0.28044	2.27546	0.0228783	0.528125
Nmbr	13.5687	1.34448	0.590682	2.27615	0.0228369	0.528125
Gm13071	43.0631	0.646062	0.284012	2.27477	0.02292	0.528386
Tmem100	728.034	-0.231337	0.101755	-2.27347	0.0229982	0.529544
Cpne3	1224.89	0.207183	0.0911784	2.27228	0.0230697	0.529903
Ston1	536.818	-0.324137	0.142632	-2.27254	0.0230538	0.529903
Plekha6	6245.34	0.228099	0.100505	2.26954	0.0232356	0.531782
Ifitm3	2827.33	0.32099	0.141425	2.26969	0.0232265	0.531782
Kcng4	12.6928	-1.31275	0.578239	-2.27026	0.0231916	0.531782
Gm18666	132.681	0.459036	0.202722	2.26436	0.0235521	0.535202
Gm13657	28.1802	-0.874787	0.386336	-2.26432	0.0235545	0.535202
Slc52a3	67.8618	-0.48825	0.215555	-2.26508	0.0235078	0.535202
Itgam	119.34	0.489772	0.216177	2.2656	0.0234757	0.535202
Kalrn	1067.11	0.231695	0.102287	2.26515	0.0235034	0.535202
Spsb3	376.948	-0.306353	0.135242	-2.26522	0.0234994	0.535202
Ints6l	1230.35	0.197037	0.0870736	2.26288	0.0236433	0.535638
Slitrk4	123.413	0.43824	0.193726	2.26217	0.0236868	0.535638
Pdzrn3	1852.93	-0.265741	0.117464	-2.26231	0.0236784	0.535638
Shcbp1	29.6607	0.941347	0.415993	2.26289	0.0236426	0.535638
Dnaaf3	459.516	0.339565	0.150163	2.26131	0.0237403	0.535931
Gm47908	59.5866	0.564367	0.249604	2.26105	0.0237563	0.535931
Cep152	197.931	0.322136	0.142613	2.25882	0.0238947	0.537134
Rbp7	359.519	-0.398529	0.176429	-2.25887	0.0238917	0.537134
Shank3	2613.03	-0.187425	0.0829607	-2.2592	0.023871	0.537134
Ulk1	5374.27	-0.160267	0.0709679	-2.2583	0.0239267	0.537218
Arhgef26	69.5488	0.572944	0.253982	2.25584	0.0240806	0.540033
Trmt2b	3097.65	0.160575	0.0713626	2.25013	0.0244405	0.54488
Fbxo46	243.244	0.310973	0.138104	2.25173	0.0243394	0.54488
Pqlc3	379.036	0.303387	0.13479	2.2508	0.0243979	0.54488
Sh3yl1	64.3602	-0.549507	0.244087	-2.25128	0.024368	0.54488
Epb41l4aos	100.128	-0.601449	0.267269	-2.25035	0.0244268	0.54488
Palld	10652.7	0.15554	0.0691715	2.24862	0.0245368	0.546384
Ica1l	9.73776	-1.42842	0.635644	-2.24719	0.0246277	0.547663
Plcb2	187.113	0.357433	0.159123	2.24627	0.0246869	0.547663
Mvd	252.443	0.297263	0.132341	2.24619	0.0246917	0.547663
Parp14	1844.66	0.307217	0.136789	2.24591	0.0247099	0.547663
Pycard	233.518	0.31594	0.140703	2.24543	0.0247405	0.547701
Fabp3.ps1	3334.56	-0.181393	0.0808272	-2.24421	0.0248188	0.548795
Gm15445	10.7749	-1.22611	0.546982	-2.24158	0.0249882	0.551199
Syn2	185.674	-0.362516	0.161717	-2.24166	0.0249832	0.551199
X2310030G06Rik	185.131	0.377142	0.168279	2.24117	0.0250148	0.551199
Hspbap1	135.824	0.398326	0.177968	2.23818	0.0252092	0.554838
Gm7292	93.3311	-0.45146	0.201858	-2.23652	0.0253175	0.555981
Isyna1	1578.66	0.247741	0.110772	2.23649	0.0253199	0.555981
Capn12	39.8877	-0.727638	0.325457	-2.23574	0.0253686	0.556407
Sfrp5	380.917	-0.429884	0.192376	-2.23461	0.0254431	0.557395
Retn	79.2514	-0.851553	0.381553	-2.23181	0.0256274	0.560417
Rasgrp2	1665.29	-0.208749	0.0935415	-2.23162	0.0256402	0.560417
Pknox2	645.585	0.285254	0.127963	2.22919	0.0258015	0.562793
Ifi47	225.17	0.523304	0.234762	2.22908	0.0258083	0.562793
Etnk2	28.822	-0.800472	0.35927	-2.22805	0.0258772	0.563646
Prap1	13.0338	1.14101	0.51272	2.2254	0.0260545	0.565559
Gm36161	23.3498	-0.963305	0.432848	-2.2255	0.0260474	0.565559
Tapbp	2952.65	0.180484	0.0811006	2.22543	0.0260524	0.565559
Fbxo27	20.3927	0.949798	0.427057	2.22406	0.0261447	0.566867
Nars	4361.61	-0.181896	0.0818207	-2.2231	0.0262089	0.567609
C1d	1243.59	-0.163925	0.0737572	-2.22249	0.0262501	0.567853
Gm14150	70.7263	0.880958	0.396865	2.21979	0.0264328	0.568872
Sycp1	10.1995	6.58774	2.96739	2.22005	0.0264154	0.568872
Rbm28	1713.58	0.169111	0.0761622	2.22041	0.0263909	0.568872
Ppm1b	6362.98	-0.229058	0.103199	-2.21958	0.0264473	0.568872
Adnp2	720.075	0.193135	0.0869728	2.22063	0.0263757	0.568872
Grwd1	523.351	-0.256017	0.115456	-2.21745	0.0265923	0.570696
Gpihbp1	2185.94	-0.224633	0.101296	-2.21759	0.026583	0.570696
Dclre1c	279.596	0.278628	0.125739	2.21592	0.0266967	0.570997
Eps8	992.074	-0.243978	0.1101	-2.21598	0.0266932	0.570997
mt.Nd3	7481.36	0.186521	0.0841417	2.21676	0.0266398	0.570997
Galnt18	617.228	-0.251192	0.113424	-2.21462	0.0267862	0.572265
Gm5564	29.2715	0.761287	0.344262	2.21136	0.0270109	0.573194
Mdfic	902.242	-0.185639	0.0839482	-2.21136	0.0270112	0.573194
Trim67	141.898	-0.501043	0.226496	-2.21215	0.0269561	0.573194
Cdc42bpb	3865.81	-0.148424	0.0670801	-2.21264	0.0269228	0.573194
Nubp1	320.573	0.359063	0.162312	2.21218	0.0269544	0.573194
Tigd3	15.7369	-0.995301	0.450083	-2.21137	0.02701	0.573194
Cmtm8	534.204	-0.313715	0.141955	-2.20996	0.0271081	0.574606
Lmntd1	585.252	0.360022	0.162966	2.20918	0.0271619	0.575105
B3galt1	94.0659	0.419181	0.189823	2.20827	0.0272252	0.575159
Ankrd12	1311.11	0.262287	0.118762	2.20851	0.0272087	0.575159
Meig1	27.8945	-0.778096	0.352558	-2.207	0.027314	0.57622
Stk24	2417.28	-0.230022	0.104239	-2.20668	0.0273362	0.57622
Ikzf2	196.856	0.347251	0.157446	2.20552	0.0274174	0.576647
Pxylp1	379.741	0.255377	0.115789	2.20553	0.0274169	0.576647
Ncapd2	1049.61	0.269746	0.122378	2.20421	0.0275095	0.577304
Exoc3l2	91.6954	-0.428079	0.194204	-2.20428	0.0275049	0.577304
Gm47175	9.7925	1.40581	0.638273	2.20252	0.0276283	0.578515
Egfl8	25.203	-0.835905	0.379484	-2.20274	0.0276128	0.578515
Ammecr1	760.02	-0.241494	0.109741	-2.20059	0.0277653	0.579018
Spaar	307.735	-0.331383	0.150624	-2.20007	0.0278018	0.579018
Fbxo10	1024.54	0.262957	0.119641	2.19788	0.0279579	0.579018
Gpx4.ps2	1100.47	-0.209787	0.0954119	-2.19875	0.0278956	0.579018
Itga11	241.547	-0.363423	0.165187	-2.20007	0.0278016	0.579018
Cyb5r4	1612.93	0.169594	0.0771152	2.19923	0.0278618	0.579018
Mtrr	835.922	0.289346	0.131647	2.19789	0.0279571	0.579018
Immp2l	431.254	-0.317532	0.144286	-2.20072	0.0277561	0.579018
Slc39a6	292.108	-0.324	0.147378	-2.19842	0.0279189	0.579018
Synpo	6246.54	-0.278743	0.126773	-2.19876	0.027895	0.579018
Gm13192	133.641	-0.504448	0.229702	-2.19609	0.0280853	0.580188
Ptprb	6765.53	-0.165317	0.0752723	-2.19626	0.0280736	0.580188
Map2k6	231.075	0.445958	0.203096	2.1958	0.0281062	0.580188
Pla2g2d	105.412	-0.517825	0.235979	-2.19437	0.0282087	0.580457
Sh3bp5	2768.69	-0.235774	0.107442	-2.19443	0.0282043	0.580457
Atp6v0a1	4479.98	-0.169376	0.0771877	-2.19434	0.0282111	0.580457
Eif3b	6266.66	-0.171263	0.0781627	-2.19111	0.0284437	0.582082
Sertad2	1521.06	0.189008	0.0862466	2.19149	0.0284167	0.582082
X2610507I01Rik	501.667	-0.420681	0.191931	-2.19183	0.0283915	0.582082
Strn3	4676.43	-0.145044	0.0661895	-2.19135	0.0284267	0.582082
Exoc3l4	162.576	-0.334601	0.152608	-2.19256	0.0283393	0.582082
Tie1	5432.91	-0.153606	0.0701379	-2.19006	0.02852	0.582385
Tmem86a	1514.86	0.282036	0.128777	2.19011	0.0285165	0.582385
Ndufaf4	3184.22	0.1562	0.0713845	2.18816	0.0286582	0.583601
Clmp	295.407	-0.433754	0.198184	-2.18865	0.0286226	0.583601
Slfn8	230.308	0.382305	0.17473	2.18797	0.0286719	0.583601
Golga4	22959.8	-0.235154	0.107535	-2.18677	0.0287595	0.584756
Git1	3441.83	-0.142687	0.0652677	-2.18618	0.0288027	0.585006
Cd36	75587	-0.255384	0.116956	-2.1836	0.0289918	0.585119
Hspb1	6815.94	-0.186209	0.0852436	-2.18443	0.0289305	0.585119
Mrpl54	1168.78	0.183338	0.0839432	2.18407	0.0289571	0.585119
Gm12002	362.396	-0.244412	0.111921	-2.18379	0.0289778	0.585119
Pcdhga11	98.2293	0.496123	0.227155	2.18408	0.0289566	0.585119
Ifit3	806.796	0.800464	0.366584	2.18357	0.0289935	0.585119
Gm7933	6.44039	1.79823	0.823857	2.1827	0.0290583	0.585802
Gm12663	32.6938	1.16393	0.533825	2.18037	0.0292302	0.588643
Ntmt1	686.786	-0.211169	0.0969765	-2.17753	0.0294414	0.589184
Hsd17b12	1208.21	0.198961	0.091367	2.1776	0.0294358	0.589184
Jun	2879.15	-0.29692	0.136463	-2.17583	0.029568	0.589184
Trpv4	343.173	-0.259696	0.119272	-2.17734	0.0294549	0.589184
A730056A06Rik	50.4128	0.563789	0.259075	2.17616	0.0295435	0.589184
Lipt2	277.988	0.275602	0.126664	2.17584	0.0295669	0.589184
Gm9905	253.75	-0.314886	0.144587	-2.17783	0.0294186	0.589184
Pirt	772.866	0.717244	0.329556	2.1764	0.0295256	0.589184
Slfn9	156.439	0.684043	0.314109	2.17773	0.0294263	0.589184
Cep55	22.2117	1.11768	0.513062	2.17846	0.0293721	0.589184
Sox17	745.881	-0.215864	0.0992895	-2.17409	0.0296983	0.590957
Gm15922	8.37582	1.63946	0.754333	2.1734	0.0297506	0.590957
Pdzd2	4857.3	0.283153	0.130281	2.1734	0.0297504	0.590957
Gm6863	146.807	-0.368725	0.169703	-2.17276	0.0297981	0.591282
Invs	287.669	0.309933	0.142853	2.16959	0.0300382	0.592993
Ercc2	440.835	-0.242312	0.111653	-2.17023	0.0299895	0.592993
Zfp511	306.449	0.248042	0.114292	2.17024	0.0299887	0.592993
Cpne2	233.079	-0.313275	0.144326	-2.1706	0.0299612	0.592993
Gm26397	9.7503	1.27838	0.58935	2.16914	0.0300722	0.592993
X1110046J04Rik	39.5607	-0.663388	0.305866	-2.16889	0.0300914	0.592993
N6amt1	1209.01	-0.267173	0.123193	-2.16873	0.0301034	0.592993
Gm38300	52.9894	0.529476	0.244218	2.16805	0.0301552	0.593396
Ankrd63	239.259	0.332744	0.153645	2.16566	0.030337	0.596354
Pcp4l1	11870.7	0.225741	0.104304	2.16426	0.0304445	0.596611
Prc1	96.451	0.759248	0.35079	2.16439	0.0304343	0.596611
Ranbp10	1508.19	-0.161776	0.074742	-2.16446	0.0304289	0.596611
Gm11784	8.97335	1.36222	0.629906	2.16258	0.0305734	0.598518
Polr1b	811.306	-0.195122	0.0904727	-2.1567	0.0310291	0.602843
Pygb	49935.9	-0.230686	0.107007	-2.15581	0.0310984	0.602843
Dkk2	16.6918	1.02101	0.473645	2.15564	0.031112	0.602843
Mpdz	3839.49	-0.151699	0.0702897	-2.1582	0.0309122	0.602843
X9430015G10Rik	194.811	0.298586	0.138387	2.15762	0.0309574	0.602843
Gvin1	211.354	0.503885	0.233753	2.15563	0.0311124	0.602843
Tpd52l1	326.491	-0.334988	0.155231	-2.158	0.0309282	0.602843
Ybx2	1546.06	0.326939	0.151542	2.15742	0.0309732	0.602843
Neurl1b	235.938	-0.323045	0.149792	-2.15662	0.0310353	0.602843
Ablim3	3078.84	-0.206865	0.0959628	-2.15567	0.0311091	0.602843
X6.Sep	430.897	0.288292	0.133899	2.15305	0.0313146	0.605522
Ap1m1	2190.5	-0.194399	0.0902861	-2.15314	0.0313077	0.605522
D430013B06Rik	8.71403	-1.35136	0.628303	-2.15081	0.031491	0.606195
Mapkapk5	337.976	-0.274007	0.127407	-2.15065	0.0315038	0.606195
Gm43196	29.5432	0.809151	0.37619	2.15091	0.0314831	0.606195
Npr3	1931.78	0.183111	0.0851447	2.15058	0.0315094	0.606195
Pcdhb4	32.6556	-0.677509	0.314925	-2.15133	0.0314498	0.606195
Timm10	1311.96	-0.251779	0.117132	-2.14953	0.0315925	0.606641
Cxcl13	78.1858	-0.875746	0.407442	-2.14938	0.0316046	0.606641
Tat	39.4366	-0.863762	0.401923	-2.14907	0.0316286	0.606641
Lysmd4	1024.31	0.261663	0.121788	2.14851	0.0316736	0.606891
Rab31	806.636	-0.293932	0.136864	-2.14762	0.0317437	0.60762
Trmt61a	255.857	-0.349323	0.162821	-2.14544	0.0319176	0.610332
A930004D18Rik	362.266	0.274688	0.128179	2.143	0.032113	0.612832
Haus5	41.7607	-0.640717	0.29895	-2.14323	0.0320948	0.612832
Trim2	513.627	-0.239561	0.111893	-2.14098	0.0322755	0.614416
Rgs7bp	499.719	0.249919	0.116765	2.14036	0.0323257	0.614416
Gm29666	38.804	0.650242	0.30377	2.14058	0.0323082	0.614416
Muc4	23.533	-1.38161	0.645315	-2.14098	0.0322758	0.614416
Abhd4	2664.61	0.149259	0.0697652	2.13945	0.0323991	0.615194
Cacna1s	659.793	-0.335064	0.156977	-2.13447	0.0328042	0.615259
Zcchc3	458.314	0.25771	0.12085	2.13248	0.0329674	0.615259
Lrp8	94.3098	0.518945	0.243519	2.13102	0.0330875	0.615259
Mgp	6997.7	0.198464	0.0930576	2.1327	0.0329494	0.615259
Sympk	5811.25	-0.232806	0.109244	-2.13106	0.0330838	0.615259
Ifngr1	2280.47	-0.155921	0.0731189	-2.13243	0.0329716	0.615259
Pwp2	955.1	-0.243202	0.113825	-2.13662	0.0326287	0.615259
Gm17745	21.1739	-0.995209	0.467089	-2.13066	0.0331168	0.615259
Agpat5	1107.64	-0.206558	0.0969436	-2.1307	0.0331136	0.615259
Fgf14	120.772	0.380421	0.178151	2.13539	0.0327295	0.615259
Cpeb4	3001.22	-0.174397	0.0817886	-2.13229	0.0329833	0.615259
Mfsd6l	7.20624	-1.42471	0.667897	-2.13313	0.0329139	0.615259
Cdc42ep4	805.879	-0.264819	0.124041	-2.13494	0.0327658	0.615259
Pxdc1	546.953	-0.244806	0.1147	-2.13431	0.0328172	0.615259
Gm9260	9.59175	1.51751	0.711264	2.13354	0.0328805	0.615259
A930017M01Rik	60.3432	-0.605508	0.284034	-2.13182	0.033022	0.615259
Krt80	126.246	-0.515528	0.241223	-2.13714	0.0325866	0.615259
B430306N03Rik	24.4941	0.956233	0.447926	2.1348	0.0327774	0.615259
Ebi3	21.3187	0.890103	0.417242	2.1333	0.0329001	0.615259
Vav1	148.507	-0.32654	0.153202	-2.13144	0.0330533	0.615259
Gm14964	133.799	-0.741929	0.348118	-2.13126	0.0330681	0.615259
Htr7	31.5241	-0.722897	0.338825	-2.13354	0.0328803	0.615259
Gm17024	115.484	-0.402707	0.189163	-2.12889	0.0332635	0.617098
Bbip1	803.126	0.191783	0.0900947	2.12868	0.033281	0.617098
Ifih1	697.558	0.251887	0.118402	2.12738	0.0333886	0.618488
Gm26917	3149.49	0.374468	0.176138	2.12599	0.0335044	0.620028
Cnih4	2374.42	0.174076	0.0819847	2.12327	0.0337309	0.620035
Rbm3	2395.37	-0.332394	0.15655	-2.12324	0.0337339	0.620035
Enox1	36.7873	-0.637959	0.300249	-2.12477	0.0336058	0.620035
Rad51c	84.5082	0.569658	0.26821	2.12392	0.0336765	0.620035
Chrd	186.302	0.37223	0.175138	2.12536	0.0335566	0.620035
Gtpbp8	665.679	0.190349	0.0896194	2.12397	0.0336726	0.620035
Dact2	80.3062	-0.495467	0.233142	-2.12517	0.0335723	0.620035
Sp110	435.586	0.313374	0.147712	2.12151	0.0338788	0.620502
Use1	3014.48	-0.23935	0.112849	-2.12099	0.033923	0.620502
Acox2	22.0645	-0.853839	0.402549	-2.12108	0.033915	0.620502
Sh3pxd2b	324.882	-0.323827	0.152656	-2.12129	0.0338971	0.620502
Gm11725	7.30645	1.59368	0.75119	2.12154	0.0338763	0.620502
Cers6	316.006	0.325887	0.153833	2.11845	0.0341369	0.621217
Pag1	276.395	0.299368	0.141341	2.11805	0.0341705	0.621217
Oasl1	110.448	0.557273	0.26302	2.11875	0.0341118	0.621217
Zfp790	574.012	0.27422	0.129404	2.11911	0.0340814	0.621217
Kcnn1	756.712	-0.261551	0.123426	-2.1191	0.0340821	0.621217
Atxn1	809.169	0.310114	0.146459	2.11742	0.0342243	0.621217
X1700120C14Rik	226.243	0.30985	0.146332	2.11745	0.0342218	0.621217
Fzd8	595.611	0.244438	0.115358	2.11895	0.034095	0.621217
Bmpr1a	4308.84	0.14822	0.0700222	2.11676	0.0342803	0.621638
Gm6532	21.4674	-1.16657	0.551216	-2.11635	0.0343149	0.62167
Sema6d	2012.35	0.235438	0.111378	2.11386	0.0345269	0.624913
Bfsp2	24.5066	0.771552	0.365142	2.11302	0.034599	0.625621
Bard1	28.2403	0.890419	0.421587	2.11206	0.034681	0.626224
Angptl2	5611.81	0.300235	0.142181	2.11164	0.0347175	0.626224
Atg16l2	557.839	0.22071	0.104548	2.11109	0.0347645	0.626224
Asxl3	33.9104	-0.712992	0.337733	-2.11111	0.0347629	0.626224
Kcnq5	38.8988	0.721303	0.341962	2.1093	0.0349183	0.626612
Zfp275	693.163	0.243269	0.115282	2.11022	0.0348398	0.626612
Tmf1	1459.67	-0.156883	0.0743657	-2.10961	0.0348916	0.626612
Gm10649	10.3516	1.29802	0.615297	2.10958	0.0348943	0.626612
Cchcr1	215.695	0.332511	0.157755	2.10777	0.0350509	0.628396
Park7	6584.21	-0.18363	0.0871562	-2.10691	0.0351258	0.629144
Gm34006	9.79268	1.28134	0.608404	2.10606	0.0351989	0.629858
Creb3	1011.17	-0.191478	0.0909991	-2.10418	0.035363	0.630198
Gnl2	1683.48	-0.249736	0.118703	-2.10387	0.0353895	0.630198
Phc2	1395.59	-0.158715	0.0754132	-2.10461	0.0353254	0.630198
C230088H06Rik	7.41099	-1.45888	0.693433	-2.10385	0.0353914	0.630198
Rcc1l	1263.2	-0.206887	0.0984263	-2.10195	0.0355578	0.630198
Lrrc61	370.976	0.254076	0.120892	2.10168	0.035581	0.630198
Gm10097	22.1621	-0.800171	0.380504	-2.10292	0.0354727	0.630198
Ddo	2428.92	0.198276	0.0942931	2.10276	0.0354868	0.630198
Slc6a2	9.3364	-1.26243	0.600683	-2.10165	0.0355837	0.630198
Tmtc4	417.824	0.322444	0.153357	2.10257	0.0355034	0.630198
Pcdhga4	63.7786	0.570759	0.271246	2.10421	0.03536	0.630198
Ifi208	116.639	0.573859	0.273234	2.10025	0.0357072	0.630616
Tmem158	114.83	0.374117	0.178111	2.10047	0.0356872	0.630616
Plin4	10661.3	-0.301319	0.143428	-2.10083	0.0356556	0.630616
Castor1	248.261	-0.312912	0.149023	-2.09976	0.0357503	0.630791
Gm13481	74.4471	-0.454206	0.216461	-2.09833	0.0358764	0.631033
B630019K06Rik	67.5168	0.531823	0.253689	2.09636	0.0360502	0.631033
Tmem255a	54.4304	0.533609	0.25496	2.09291	0.0363571	0.631033
Xlr4a	33.7323	-1.00058	0.476817	-2.09845	0.0358654	0.631033
Pear1	1266.38	-0.178426	0.0850411	-2.09812	0.0358948	0.631033
Magi3	3477.09	0.248476	0.118747	2.09249	0.0363949	0.631033
Abcb4	1435	-0.284917	0.136236	-2.09135	0.0364967	0.631033
Rab11fip5	4631.12	-0.21897	0.104683	-2.09174	0.0364617	0.631033
Iffo1	881.547	0.168278	0.0803538	2.09422	0.0362407	0.631033
Cib1	425.04	-0.258605	0.123585	-2.09253	0.0363914	0.631033
Adamtsl3	551.051	0.223194	0.106605	2.09366	0.0362903	0.631033
Tead1	6993.87	-0.172757	0.0825915	-2.09171	0.0364647	0.631033
Gm7346	6.58214	-1.48779	0.711171	-2.09203	0.036436	0.631033
Tgm1	14.9208	-1.05936	0.505822	-2.09433	0.0362307	0.631033
Amotl1	4667.98	-0.11798	0.0563046	-2.09539	0.0361362	0.631033
X4931440F15Rik	109.329	-0.369042	0.176083	-2.09585	0.0360957	0.631033
Vmp1	2293.3	-0.146862	0.0700463	-2.09664	0.0360254	0.631033
Etv4	21.7339	1.19752	0.571218	2.09644	0.0360435	0.631033
Slc16a6	405.552	-0.219107	0.104452	-2.09768	0.0359334	0.631033
Sv2c	23.5973	-1.08032	0.516442	-2.09185	0.0364517	0.631033
Cpt1b	531.652	-0.304085	0.145298	-2.09284	0.0363638	0.631033
Aaas	480.664	0.212117	0.101339	2.09315	0.0363356	0.631033
Trim59	68.5133	0.694813	0.332562	2.08927	0.0366833	0.632755
Gm18190	52.2052	-0.614542	0.294195	-2.08889	0.0367176	0.632755
Fuz	442.695	0.240403	0.115094	2.08875	0.0367298	0.632755
Tssk4	14.6451	1.17402	0.561775	2.08985	0.0366315	0.632755
Arl5a	2082.5	0.149977	0.07183	2.08794	0.0368034	0.633446
Col4a6	206.601	0.311123	0.14912	2.08639	0.0369431	0.634697
Tppp	1380.74	0.23389	0.112084	2.08673	0.0369127	0.634697
Ubb	12837.9	-0.189116	0.0907521	-2.08387	0.037172	0.637474
Smarcd1	1547.55	0.227086	0.10896	2.08413	0.0371485	0.637474
Dusp10	358.907	0.277362	0.133261	2.08134	0.0374027	0.639695
Lbp	370.05	-0.269601	0.129532	-2.08135	0.0374018	0.639695
Hsp90b1	10478.7	0.132096	0.063457	2.08167	0.0373729	0.639695
Gm15848	33.1112	0.760387	0.365517	2.0803	0.0374976	0.63992
Ddx24	3798.84	-0.222349	0.106895	-2.08006	0.0375198	0.63992
Ubald1	1359.54	-0.165744	0.0796847	-2.08	0.0375255	0.63992
Srf	4268.75	-0.207355	0.0997034	-2.07972	0.037551	0.63992
Bcl6	929.115	0.230316	0.110795	2.07876	0.0376394	0.64085
Timp4	1364.38	-0.859851	0.413811	-2.07788	0.0377203	0.641076
Ankrd2	8.17439	-1.36105	0.65494	-2.07813	0.0376977	0.641076
Gm20627	10.3651	1.2874	0.619828	2.07702	0.0377993	0.641268
Gm12341	13.77	-0.994999	0.47898	-2.07733	0.0377712	0.641268
N4bp2os	132.067	0.374036	0.180199	2.07569	0.0379231	0.642514
Hells	55.2142	0.732381	0.35287	2.0755	0.0379405	0.642514
Rpl17.ps8	14.7765	-1.05904	0.510779	-2.07337	0.0381377	0.645276
Ppan	349.534	-0.261115	0.126001	-2.07233	0.0382348	0.646343
Gm11224	8.28817	-1.25928	0.607839	-2.07173	0.0382904	0.646705
Sgms2	82.4061	-0.467056	0.225566	-2.0706	0.0383964	0.647032
Atp5mpl	5969.61	0.12045	0.0581763	2.07043	0.0384122	0.647032
Zfp946	232.592	0.28498	0.137595	2.07115	0.0383447	0.647032
Xpo1	1964.46	0.220399	0.106472	2.07001	0.0384511	0.647112
Arhgap23	1303.87	-0.157979	0.0763703	-2.0686	0.038584	0.648772
Adam23	169.094	-0.3272	0.158228	-2.06791	0.0386489	0.648801
Oas1b	163.104	0.408313	0.197461	2.06782	0.0386571	0.648801
Dmwd	3000.2	-0.200731	0.09713	-2.06662	0.0387703	0.648801
Rev3l	859.386	0.169232	0.0818971	2.0664	0.0387911	0.648801
Dync1li1	2734.29	-0.20319	0.0983159	-2.0667	0.038762	0.648801
Gm9575	45.8116	-0.663426	0.320916	-2.06729	0.0387072	0.648801
Ccdc149	482.002	-0.233504	0.113086	-2.06485	0.0389374	0.650674
Dstn	6451.7	0.180809	0.0875935	2.06419	0.0389998	0.651142
Gnb3	417.916	-0.78545	0.380667	-2.06335	0.039079	0.651317
Nt5e	873.823	-0.322165	0.156132	-2.06341	0.0390736	0.651317
Gm4895	30.5416	-0.686137	0.332841	-2.06146	0.0392594	0.653482
Zfp612	1107.93	0.224115	0.108731	2.06119	0.0392853	0.653482
Vegfb	11616.9	0.154055	0.0747511	2.0609	0.0393124	0.653482
Naxe	2151.61	-0.174545	0.0847768	-2.05888	0.039506	0.655086
Fitm1	3111.63	0.252644	0.122707	2.05892	0.039502	0.655086
Ackr4	202.932	0.52592	0.255448	2.05881	0.0395126	0.655086
Cracr2a	221.384	0.318105	0.154549	2.05828	0.0395637	0.65536
Oas1a	201.562	0.57112	0.277612	2.05726	0.0396611	0.6564
Apbb2	1742.53	0.184364	0.0897437	2.05434	0.0399424	0.657039
Zfand4	262.862	0.318161	0.154819	2.05506	0.0398736	0.657039
Trim30a	687.226	0.360719	0.175457	2.05588	0.0397939	0.657039
Gm8995	979.748	0.233376	0.113574	2.05483	0.0398953	0.657039
Lss	243.755	0.27969	0.136143	2.05438	0.0399386	0.657039
Colq	380.735	-0.479847	0.233532	-2.05474	0.0399045	0.657039
Pcdhgb5	100.09	0.411203	0.19996	2.05643	0.0397412	0.657039
Map3k6	759.742	-0.741313	0.360974	-2.05365	0.0400098	0.657382
Fads1	1176.01	-0.184659	0.089928	-2.05341	0.0400327	0.657382
Tmem132e	16.6379	0.970503	0.472811	2.05262	0.0401091	0.657633
AC154507.3	76.3891	0.63111	0.307478	2.05254	0.0401174	0.657633
Sin3b	1974.4	-0.152964	0.0745641	-2.05144	0.0402242	0.658246
Gm36723	8.54283	-1.22395	0.596552	-2.05171	0.0401983	0.658246
Lilra6	20.2713	1.17215	0.571557	2.05081	0.0402857	0.658684
Ubn2	1809.14	0.146337	0.0713897	2.04983	0.0403807	0.659305
Chrna10	111.928	0.452977	0.220996	2.0497	0.0403933	0.659305
Xpnpep2	125.472	0.373331	0.182207	2.04894	0.0404682	0.659412
Mia2	3833.82	0.148635	0.0725491	2.04875	0.040487	0.659412
Arvcf	1072.51	-0.16168	0.0789235	-2.04857	0.0405042	0.659412
Zfp112	267.443	0.268476	0.131078	2.04821	0.0405391	0.659412
Micu1	825.822	-0.22062	0.107769	-2.04714	0.040644	0.660552
Fzd5	228.382	0.287696	0.140632	2.04574	0.0407823	0.660803
Xlr4b	25.3266	-0.834129	0.407917	-2.04485	0.0408696	0.660803
Nmd3	855.131	-0.217878	0.106568	-2.04451	0.0409035	0.660803
C5ar2	59.9248	-0.593718	0.290281	-2.04532	0.0408232	0.660803
Zfp958	306.96	0.243052	0.118779	2.04625	0.0407318	0.660803
H2.T22	1292.5	0.267426	0.130789	2.04471	0.0408839	0.660803
Sfxn3	395.535	-0.242094	0.118383	-2.045	0.0408544	0.660803
Ddrgk1	3161.53	-0.287671	0.140756	-2.04376	0.0409768	0.661423
BC052040	182.556	-0.288172	0.141164	-2.0414	0.0412109	0.663573
Gramd1b	2231.56	0.183003	0.0896629	2.04101	0.0412501	0.663573
Gm3325	72.5211	0.467701	0.229096	2.04151	0.0412005	0.663573
Psmb9	445.747	0.350151	0.171546	2.04115	0.0412363	0.663573
Stc2	989.681	0.302701	0.148388	2.03993	0.041357	0.664729
Cadm3	193.57	-0.367654	0.180392	-2.03808	0.0415415	0.666183
Asb11	4748.55	-0.240946	0.118277	-2.03713	0.0416366	0.666183
Tia1	1587.87	0.147302	0.072287	2.03773	0.0415766	0.666183
Pygo1	1344.04	-0.210413	0.103267	-2.03757	0.0415928	0.666183
Tnf	11.8864	1.16251	0.570722	2.03692	0.0416584	0.666183
Haus1	549.726	-0.24196	0.1187	-2.03842	0.0415084	0.666183
Man1c1	2544.78	-0.203919	0.100171	-2.03572	0.0417788	0.666982
Paqr9	3723.19	0.167339	0.0821986	2.03579	0.0417712	0.666982
Marveld2	37.9163	0.641656	0.315299	2.03507	0.0418437	0.667456
X2010204K13Rik	20.4328	0.972086	0.477921	2.03399	0.0419527	0.668632
Gbp6	663.594	0.375229	0.18464	2.03222	0.0421312	0.670104
Cmklr1	879.907	-0.225352	0.1109	-2.03202	0.0421512	0.670104
Tssk1	21.1005	-0.771126	0.379484	-2.03204	0.04215	0.670104
Rbm3.ps	16.833	-0.96844	0.477016	-2.0302	0.0423358	0.670222
Pitx2	50.0435	0.564163	0.277874	2.03028	0.042328	0.670222
Gnrhr	7.40386	-1.67294	0.823921	-2.03047	0.0423091	0.670222
AI854703	83.7246	0.425696	0.20965	2.0305	0.0423053	0.670222
Bloc1s3	310.799	0.340881	0.167933	2.02986	0.0423708	0.670222
Syt7	2479.51	0.265657	0.130821	2.0307	0.0422858	0.670222
X0610009B22Rik	716.647	-0.25895	0.127613	-2.02919	0.0424392	0.670745
Tmem245	5253.66	-0.231663	0.114226	-2.02811	0.0425487	0.67173
Tbx5	2392.09	0.188433	0.0929353	2.02757	0.0426044	0.67173
Rsad1	993.76	0.167263	0.0825101	2.02719	0.0426433	0.67173
Grhl2	158.069	0.411039	0.202741	2.02741	0.0426208	0.67173
Rps6kc1	787.596	-0.173896	0.0858143	-2.02643	0.0427211	0.672395
Gm49123	21.2884	-0.779104	0.384883	-2.02426	0.0429431	0.675329
Agap1	1743.6	-0.148736	0.0735439	-2.02241	0.0431343	0.675547
Prox1	3357.79	0.156847	0.0775815	2.02171	0.0432065	0.675547
Blcap	2214.8	-0.137324	0.0679093	-2.02217	0.0431593	0.675547
Sulf2	3716.83	0.261998	0.129542	2.0225	0.043125	0.675547
Ctnnbip1	900.669	-0.175889	0.0869882	-2.02198	0.0431782	0.675547
Irf7	806.454	0.64359	0.318284	2.02206	0.0431697	0.675547
Vwa8	15643.3	-0.221268	0.10944	-2.02182	0.0431944	0.675547
Tmcc2	2011.2	-0.192583	0.0953632	-2.01947	0.0434384	0.676383
X9230111E07Rik	13.5501	-1.06659	0.528139	-2.01953	0.0434324	0.676383
Lrrtm3	14.5997	0.993598	0.491842	2.02016	0.0433671	0.676383
Pts	1496.43	0.187889	0.0930367	2.01952	0.0434333	0.676383
Meox2	674.169	0.244002	0.120793	2.02	0.0433831	0.676383
Insyn1	1211.64	-0.178931	0.0886466	-2.01847	0.0435424	0.67701
Usp16	1834.34	-0.176631	0.0875105	-2.0184	0.0435501	0.67701
Gm48420	15.2639	-1.01623	0.503665	-2.01768	0.0436251	0.67762
Igsf8	645.81	0.192129	0.0953139	2.01575	0.0438261	0.678517
Abr	2017.51	0.145148	0.0719945	2.0161	0.0437897	0.678517
Masp1	563.94	0.293627	0.145661	2.01582	0.0438191	0.678517
Zfp229	276.425	0.283498	0.140641	2.01575	0.0438258	0.678517
Ccdc166	90.3085	0.388911	0.192982	2.01527	0.0438768	0.678747
Kbtbd13	196.768	0.344439	0.170946	2.0149	0.0439154	0.67879
Gm13050	445.468	-0.254075	0.126133	-2.01434	0.0439744	0.679148
Sfrp2	204.27	-0.381542	0.189538	-2.01301	0.0441134	0.679676
Piwil2	58.2813	-0.478796	0.237851	-2.01301	0.0441139	0.679676
Cspg4	1243.61	0.264911	0.131601	2.01299	0.0441162	0.679676
Dsn1	87.6592	0.409434	0.20367	2.01028	0.0444011	0.68351
Yeats2	707.019	0.220516	0.109725	2.00971	0.0444614	0.683883
Abcc5	3285.03	0.18412	0.0916381	2.00921	0.0445151	0.684153
Lars	2727.89	-0.166193	0.0827436	-2.00853	0.0445867	0.684698
Lyplal1	74.5798	-0.526349	0.262393	-2.00596	0.0448609	0.68613
Pla2g4b	63.8067	0.579221	0.288711	2.00623	0.0448316	0.68613
Snapin	2885.12	-0.154147	0.0768282	-2.00639	0.0448147	0.68613
Lrp1	9659.71	-0.144894	0.0722119	-2.00651	0.0448019	0.68613
Rps6.ps2	25.4587	0.741829	0.369782	2.00612	0.0448429	0.68613
Baz2b	1820.14	0.143565	0.0717101	2.00202	0.045283	0.686668
Gata2	900.837	-0.172297	0.0860052	-2.00334	0.0451411	0.686668
Hirip3	421.432	0.221428	0.110581	2.00241	0.0452412	0.686668
Ddx21	2352.66	-0.196836	0.0982949	-2.0025	0.0452307	0.686668
Cox5a	18779.9	0.117793	0.0588321	2.00219	0.045264	0.686668
Colec11	822.106	-0.276782	0.138138	-2.00367	0.0451055	0.686668
Slc24a4	48.6698	0.587816	0.293628	2.00191	0.0452947	0.686668
Ighg2b	10.9449	-1.48673	0.742175	-2.00321	0.0451545	0.686668
Kifc2	522.276	0.264561	0.132026	2.00385	0.0450857	0.686668
Snx4	1837.87	-0.163916	0.0817935	-2.00402	0.0450675	0.686668
Gm6548	221.052	0.324444	0.161978	2.00301	0.0451765	0.686668
Mpv17	2114.21	0.168942	0.084458	2.00031	0.0454666	0.688723
Hoxa1	11.2486	1.17204	0.586213	1.99935	0.0455707	0.689501
Fbxo5	80.6685	0.453671	0.226954	1.99896	0.0456129	0.689501
Zfp2	223.919	0.262782	0.131468	1.99883	0.0456271	0.689501
Slc40a1	1602.35	-0.374112	0.187198	-1.99849	0.0456639	0.689506
Ndufaf6	604.617	-0.244319	0.122302	-1.99767	0.045752	0.689625
Gm830	7.12343	-1.38741	0.694481	-1.99777	0.0457415	0.689625
Ifi27l2b	13.0913	1.2033	0.602434	1.99739	0.0457828	0.689625
Gna14	16.6184	0.976818	0.489125	1.99707	0.0458173	0.689625
X4931414P19Rik	257.795	0.24598	0.123195	1.99667	0.0458606	0.68973
Erbb4	693.187	0.241691	0.121438	1.99025	0.0465637	0.690754
Gm3608	115.491	1.58486	0.795574	1.99209	0.0463609	0.690754
Rabgap1l	3695.3	0.14769	0.0741729	1.99116	0.046463	0.690754
Gm15429	65.3745	-0.450564	0.226651	-1.98792	0.0468207	0.690754
Rnf128	3627.21	0.141818	0.0712272	1.99107	0.0464735	0.690754
Cks1b	119.663	0.394696	0.198504	1.98835	0.0467726	0.690754
C920021L13Rik	84.2978	0.417385	0.209825	1.9892	0.0466788	0.690754
Cxxc4	158.499	0.310224	0.155826	1.99084	0.0464983	0.690754
Gbp2	1170.67	0.391287	0.196772	1.98853	0.0467533	0.690754
AW011738	293.593	-0.335729	0.168661	-1.99056	0.0465293	0.690754
Agbl5	409.092	0.244504	0.122794	1.99117	0.0464622	0.690754
Cpeb2	1826.14	0.180894	0.090677	1.99493	0.0460505	0.690754
Gm9825	111.554	1.50642	0.75597	1.99269	0.0462949	0.690754
D030034A15Rik	33.3347	0.704288	0.3542	1.98839	0.0467682	0.690754
Gm10060	13.2793	1.18059	0.591695	1.99527	0.046013	0.690754
Rpl15	5888.48	0.142275	0.0713614	1.99373	0.0461819	0.690754
Gnl3	902.923	-0.265557	0.133083	-1.99543	0.0459963	0.690754
Lgals3	430.434	0.308837	0.154971	1.99287	0.0462755	0.690754
Sfi1	679.13	0.203853	0.102468	1.98943	0.0466534	0.690754
Cdc6	33.618	0.945533	0.474226	1.99385	0.0461689	0.690754
Lrrc9	7.43827	1.45447	0.729493	1.99381	0.0461723	0.690754
Mnat1	688.116	-0.203186	0.102105	-1.98997	0.046594	0.690754
X2510002D24Rik	584.962	0.200434	0.100835	1.98774	0.0468401	0.690754
Gm3222	44.0964	-0.632639	0.317742	-1.99105	0.0464758	0.690754
Ifit2	1090.22	0.360849	0.181416	1.98906	0.0466942	0.690754
Gm33432	24.0899	0.808374	0.406815	1.98708	0.0469137	0.691302
Atp6v0c.ps2	271.091	1.36033	0.684823	1.9864	0.0469894	0.691546
Acat1	29193.4	-0.160088	0.080597	-1.98627	0.0470032	0.691546
Tyrp1	8.33279	1.47688	0.743695	1.98587	0.0470474	0.691659
Sp100	1981.76	0.255246	0.128642	1.98415	0.047239	0.693937
Edar	16.9242	-0.978943	0.493487	-1.98373	0.0472863	0.694025
Epn3	1326.57	-0.214452	0.108121	-1.98344	0.0473182	0.694025
Rassf9	564.328	0.201511	0.101642	1.98256	0.0474169	0.694934
Gdf10	162.65	0.363303	0.183296	1.98205	0.0474732	0.695222
Mpped2	978.762	0.215284	0.108845	1.97789	0.0479416	0.6965
Gm34240	7.58834	2.23611	1.12987	1.97909	0.0478055	0.6965
Rad23b	5405.57	-0.128696	0.0650642	-1.97799	0.0479298	0.6965
C130083M11Rik	263.201	0.309824	0.156469	1.9801	0.0476925	0.6965
Nsmce1	1356.59	-0.231227	0.116799	-1.9797	0.0477376	0.6965
Stab2	53.0565	-0.807083	0.407808	-1.97907	0.0478077	0.6965
Gm37621	66.6396	0.468683	0.236913	1.97829	0.0478963	0.6965
Adcy1	496.807	0.26688	0.134946	1.97768	0.0479648	0.6965
Vti1b	4035.19	-0.180251	0.091004	-1.98069	0.0476258	0.6965
Gm15609	24.5955	-0.776657	0.392427	-1.97911	0.0478038	0.6965
Robo2	106.097	-0.510972	0.258323	-1.97804	0.0479247	0.6965
Kdelc1	660.271	0.21044	0.106492	1.9761	0.0481433	0.697488
Klhl5	981.217	-0.18104	0.0916053	-1.9763	0.0481207	0.697488
Pcsk7	1063.9	-0.15902	0.0804549	-1.97651	0.0480975	0.697488
Prss23	390.601	-0.27664	0.140123	-1.97427	0.0483513	0.699578
Fbxo40	11554.6	-0.209379	0.106059	-1.97418	0.0483614	0.699578
Fcmr	15.2134	-1.06217	0.53855	-1.97228	0.048578	0.700573
Dnajb5	3723.82	-0.221891	0.112497	-1.97242	0.0485621	0.700573
Polr1e	864.965	0.238418	0.120883	1.97231	0.0485746	0.700573
Adprhl2	619.447	-0.172036	0.087185	-1.97323	0.0484697	0.700573
Rock1	3502.14	0.14448	0.0732776	1.97168	0.0486462	0.701023
Mxd4	4423.48	-0.117813	0.0597696	-1.97112	0.0487099	0.701408
Cdh16	56.0656	0.503479	0.255502	1.97055	0.0487751	0.701814
Hfe	1747.85	-0.16655	0.0845615	-1.96957	0.0488873	0.702893
Rhbdl3	806.636	0.221175	0.112319	1.96917	0.0489339	0.703031
Acsl4	780.302	0.163446	0.0831014	1.96683	0.0492033	0.703097
Epb41l4b	171.972	0.306391	0.155751	1.96719	0.0491619	0.703097
Adap1	191.762	-0.313539	0.159328	-1.96789	0.0490812	0.703097
Tm6sf2	56.3748	0.522979	0.265923	1.96666	0.0492229	0.703097
Uqcr10	8818.42	0.115869	0.0588904	1.96753	0.0491224	0.703097
Dnah2	41.9822	-0.554834	0.282136	-1.96655	0.0492353	0.703097
Nsun2	2139.42	-0.264892	0.134689	-1.9667	0.0492176	0.703097
X4632428C04Rik	430.854	0.224324	0.114006	1.96766	0.0491077	0.703097
Irf9	1270.09	0.332168	0.168968	1.96586	0.0493145	0.703697
Tgm2	9037.89	-0.20052	0.102073	-1.96447	0.0494754	0.704549
Gm14857	22.9658	-0.757969	0.385856	-1.96438	0.0494857	0.704549
Nek1	917.157	0.165943	0.0844606	1.96474	0.0494439	0.704549
Ifi204	314.991	0.32258	0.164291	1.96347	0.0495921	0.705154
Egr2	22.885	-0.899782	0.458284	-1.96337	0.0496026	0.705154
Aldh1a3	106.394	-0.373087	0.190061	-1.96299	0.0496476	0.705264
Arpc5l	2905.26	-0.141546	0.0722024	-1.96041	0.0499484	0.705329
Mkks	687.314	0.259969	0.132565	1.96107	0.0498707	0.705329
Gbp9	1709.44	0.336078	0.171297	1.96196	0.0497671	0.705329
Smyd5	550.514	-0.184738	0.094235	-1.96039	0.0499499	0.705329
Ceacam1	770.684	-0.183768	0.0936867	-1.96151	0.0498192	0.705329
Tmed9	3208.69	-0.180755	0.0921757	-1.96099	0.0498805	0.705329
Rbbp8	269.433	0.243324	0.124075	1.96111	0.0498664	0.705329
Gsto1	4928.26	-0.183498	0.0935645	-1.96119	0.0498565	0.705329
Rhd	341.908	-0.446826	0.228105	-1.95886	0.0501288	0.705444
Filip1	3931.03	-0.193211	0.0986409	-1.95873	0.0501442	0.705444
E430024P14Rik	7.38807	1.45828	0.744079	1.95985	0.0500132	0.705444
Fam122a	705.226	-0.236209	0.120568	-1.95914	0.0500966	0.705444
Sgms1	2405.16	-0.201419	0.10282	-1.95895	0.0501186	0.705444
Zc3h6	408.918	0.278691	0.142305	1.95841	0.0501818	0.70545
Abl1	3304.53	0.174604	0.0892183	1.95704	0.050343	0.705654
Stpg1	21.7542	0.807494	0.412518	1.95748	0.0502915	0.705654
Socs7	1760.64	-0.154521	0.0789282	-1.95774	0.050261	0.705654
C030034I22Rik	63.6607	0.507044	0.25909	1.95702	0.0503453	0.705654
Fam171b	134.428	0.366476	0.18735	1.95611	0.0504522	0.706108
Ripor3	88.4427	-0.424744	0.217109	-1.95636	0.0504222	0.706108
Hspa4l	3426.46	0.137318	0.070259	1.95445	0.0506481	0.70666
Shisa2	97.1246	0.447954	0.229227	1.9542	0.0506781	0.70666
Uchl3	1167.82	-0.181579	0.0928907	-1.95476	0.0506116	0.70666
Glns.ps1	84.2568	-0.420001	0.214893	-1.95447	0.0506461	0.70666
Gcnt2	396.671	-0.272191	0.13927	-1.95441	0.0506522	0.70666
Ints4	2292.55	-0.142072	0.072746	-1.95298	0.0508216	0.70814
Gm36535	134.468	0.416783	0.213566	1.95154	0.0509933	0.708968
Nfat5	2910.92	0.147144	0.0753881	1.95181	0.0509602	0.708968
Epop	66.1355	0.590525	0.30251	1.95208	0.0509282	0.708968
Tmco4	621.058	-0.175861	0.0901538	-1.95068	0.0510952	0.709344
Pcdhgc3	531.461	0.204106	0.104632	1.9507	0.0510926	0.709344
Ubqln4	4145.98	-0.124775	0.0640167	-1.9491	0.0512835	0.710916
X2310022A10Rik	2375.98	-0.128563	0.0659552	-1.94925	0.0512656	0.710916
Gal3st2b	35.8012	0.58303	0.299308	1.94793	0.0514234	0.710918
Ncapg	24.024	1.03092	0.52902	1.94873	0.0513276	0.710918
Rasl11a	45.2846	-0.737145	0.378681	-1.94661	0.0515813	0.710918
Dio2	148.834	-0.450325	0.231287	-1.94704	0.0515299	0.710918
Gm4468	23.6501	1.14985	0.590454	1.94739	0.0514875	0.710918
Gm16031	10.335	-1.09523	0.56239	-1.94746	0.0514798	0.710918
Slc22a12	6.40677	-2.16964	1.11459	-1.94659	0.0515837	0.710918
Btrc	1130.03	-0.15074	0.0773688	-1.94833	0.0513753	0.710918
Dnajc16	1991.67	-0.141497	0.0727205	-1.94576	0.0516839	0.711173
Gm8925	37.2558	0.573799	0.294914	1.94565	0.0516967	0.711173
Tmem65	11230.2	0.182856	0.093989	1.9455	0.0517148	0.711173
Prss35	30.6475	0.716414	0.368361	1.94487	0.0517908	0.711701
Zfp418	59.48	0.465667	0.239601	1.94351	0.0519547	0.712609
Gm30302	37.2207	-1.0801	0.555782	-1.94338	0.0519697	0.712609
Comt	6258.31	-0.539633	0.277634	-1.94368	0.0519335	0.712609
Gm43668	103.336	0.350865	0.180588	1.94291	0.0520276	0.712887
Polr2l	1555.28	0.177041	0.0911493	1.94232	0.0520988	0.713348
Ube2t	182.056	0.412811	0.212703	1.94078	0.052285	0.714753
Lrig2	558.266	0.18712	0.0963992	1.9411	0.0522464	0.714753
Sar1a	7511.9	-0.212669	0.109593	-1.94054	0.0523147	0.714753
Rorb	25.9573	-0.84187	0.434059	-1.93953	0.052437	0.715909
Gm49284	240.464	0.259248	0.133721	1.93872	0.052536	0.716744
Nek2	20.7996	1.12343	0.579927	1.9372	0.0527214	0.718756
Gm15674	25.8582	-0.716591	0.370098	-1.93622	0.0528409	0.718951
Sptbn4	111.307	-0.578967	0.29903	-1.93615	0.0528496	0.718951
Mpp7	358.278	0.231759	0.11967	1.93665	0.0527877	0.718951
Sass6	77.52	0.425024	0.219746	1.93416	0.0530939	0.721757
Vstm4	533.243	-0.280334	0.144962	-1.93385	0.053132	0.721757
Gm6652	232.727	-0.29838	0.154366	-1.93294	0.053244	0.722053
Cdnf	1533.63	-0.150791	0.0780413	-1.9322	0.0533349	0.722053
Smap2	2465.95	-0.162061	0.0838772	-1.93212	0.0533443	0.722053
Pgls	1648.07	0.144315	0.0746816	1.9324	0.0533103	0.722053
Chmp6	1071.55	-0.144793	0.0749346	-1.93226	0.0533269	0.722053
Lztfl1	997.356	0.174079	0.090119	1.93166	0.0534014	0.72221
Psmd12	4502.12	-0.178148	0.0922374	-1.93141	0.0534321	0.72221
Slc4a8	190.826	-0.348326	0.180376	-1.9311	0.0534703	0.722211
Slc25a34	9860.4	-0.286055	0.148396	-1.92765	0.0538992	0.72234
X4932441J04Rik	216.41	0.276545	0.143427	1.92813	0.0538389	0.72234
Pptc7	7526.68	-0.137785	0.0713827	-1.93024	0.0535774	0.72234
Parp12	1501.98	0.202112	0.104743	1.9296	0.0536567	0.72234
Fgd5	1868.51	-0.182204	0.0944751	-1.92859	0.0537813	0.72234
X2200002D01Rik	48.5431	0.516712	0.267746	1.92986	0.0536247	0.72234
Csrp3	39658.4	-0.171331	0.0888788	-1.92769	0.0538936	0.72234
Mnt	945.152	0.209767	0.108762	1.92868	0.0537709	0.72234
Wipi1	5313.29	-0.136123	0.0706015	-1.92805	0.0538486	0.72234
Nek9	11623.7	-0.118721	0.06156	-1.92854	0.0537877	0.72234
Dpysl3	1928.36	0.18678	0.0968077	1.92939	0.0536821	0.72234
Gm14412	32.2795	-0.749251	0.388814	-1.92701	0.0539779	0.7224
Dusp11	2858.55	0.144173	0.0748285	1.92671	0.0540158	0.7224
Gm36423	10.6144	-1.16082	0.602491	-1.92669	0.054018	0.7224
Lamb3	1006.53	0.256209	0.133098	1.92496	0.0542342	0.723861
Map6	340.456	-0.304822	0.158366	-1.9248	0.0542549	0.723861
Gypc	1942.4	0.172635	0.0896885	1.92482	0.0542513	0.723861
Zfp407	649.306	0.191492	0.0994975	1.9246	0.05428	0.723861
Fam83e	9.96603	-1.22911	0.638982	-1.92354	0.0544117	0.723878
Usp47	6923.1	-0.159587	0.0829747	-1.92333	0.0544392	0.723878
Pik3c2a	744.401	0.173498	0.0902023	1.92343	0.0544256	0.723878
Gnptab	2131.01	0.165991	0.0863162	1.92306	0.0544723	0.723878
Kif5b	7720.51	-0.120521	0.06265	-1.92373	0.0543888	0.723878
Gm13889	183.94	-0.314946	0.164269	-1.91726	0.0552046	0.727044
Knstrn	49.5116	0.575525	0.300002	1.9184	0.05506	0.727044
Gm11451	108.33	0.405587	0.211555	1.91717	0.0552161	0.727044
Itgb3bp	172.299	0.307076	0.159935	1.92	0.0548578	0.727044
Slc2a5	18.0078	0.950918	0.496523	1.91515	0.0554728	0.727044
Fam213b	3499.75	-0.267971	0.139709	-1.91807	0.0551023	0.727044
Oas2	804.917	0.336322	0.175614	1.91511	0.0554778	0.727044
Dnah6	25.6546	-1.04712	0.546735	-1.91523	0.0554634	0.727044
Mrpl48	2182.36	0.15608	0.08138	1.91792	0.0551213	0.727044
Gm16577	6.55024	1.45731	0.759039	1.91994	0.054865	0.727044
Bves	3146.03	0.210366	0.109767	1.91647	0.0553049	0.727044
Midn	3602.4	-0.221293	0.115271	-1.91977	0.0548868	0.727044
Cd209d	6.20034	-1.79863	0.938677	-1.91613	0.0553488	0.727044
Tlr3	507.621	0.206145	0.107481	1.91796	0.055116	0.727044
Gm38391	52.0944	-0.535672	0.279396	-1.91725	0.0552061	0.727044
Atp2a3	918.187	-0.183168	0.0956001	-1.91598	0.0553679	0.727044
Prr11	40.7156	0.662705	0.345315	1.91913	0.0549676	0.727044
Ptp4a3	16067.1	-0.226336	0.118106	-1.91639	0.0553158	0.727044
Rpl9.ps6	55.2159	-0.535948	0.279135	-1.92003	0.0548545	0.727044
Nt5c2	1718.56	-0.171508	0.0895405	-1.91542	0.055439	0.727044
Lgr6	3224.03	0.220112	0.114999	1.91403	0.0556164	0.728356
Entpd2	670.191	-0.209127	0.109296	-1.91339	0.0556978	0.728596
Mrpl37	3628.57	0.138265	0.0722658	1.91328	0.0557117	0.728596
Ttc41	132.27	0.337636	0.176511	1.91283	0.0557703	0.72886
Pcid2	632.63	0.186554	0.0975541	1.91232	0.0558355	0.729209
Ttn	196520	0.145421	0.076116	1.91052	0.0560663	0.729622
Pla2g4e	434.32	0.352894	0.184764	1.90997	0.0561367	0.729622
Lpin3	293.776	-0.265719	0.139104	-1.91021	0.0561062	0.729622
Arhgef9	1052.24	0.204881	0.107178	1.91159	0.0559286	0.729622
Gm1866	16.025	1.16591	0.610312	1.91034	0.0560889	0.729622
Ggcx	1117.86	0.264147	0.138225	1.91099	0.0560062	0.729622
Pnp	257.365	-0.267669	0.140167	-1.90964	0.0561797	0.729622
Gm4335	79.5093	0.420432	0.220193	1.90938	0.0562136	0.729622
Clic6	38.3507	0.771606	0.403811	1.91081	0.0560289	0.729622
Tsr1	794.205	-0.241374	0.126481	-1.90838	0.0563423	0.730791
Pdk4	27255.9	-1.31491	0.689311	-1.90757	0.0564464	0.731641
Fam124b	23.0346	-0.71979	0.37741	-1.90718	0.056497	0.731774
Lat2	46.9229	0.522086	0.273788	1.9069	0.0565338	0.731774
Pogz	1054.41	0.17123	0.089833	1.90609	0.0566384	0.732153
Lbx2	47.6067	-0.538708	0.282627	-1.90608	0.0566405	0.732153
Aox3	74.8602	0.5278	0.277133	1.9045	0.056845	0.733796
Slc4a4	1555.45	-0.193846	0.101777	-1.90462	0.0568299	0.733796
Nyx	29.7354	-0.637503	0.335256	-1.90154	0.0572315	0.735457
Tbc1d2	101.654	-0.387618	0.203728	-1.90263	0.0570894	0.735457
Hip1r	1221.97	-0.164457	0.0864401	-1.90255	0.0570991	0.735457
Tmem176b	1541.7	0.176139	0.0926517	1.90109	0.0572908	0.735457
Kcnj14	33.727	-0.693761	0.364646	-1.90256	0.057098	0.735457
Bst2	1034.73	0.556722	0.292681	1.90215	0.0571518	0.735457
X2700049A03Rik	296.221	0.260413	0.136931	1.90178	0.0571997	0.735457
Tc2n	15.8088	-1.02549	0.539492	-1.90084	0.057323	0.735457
Hsp90aa1	5328.39	-0.147227	0.0774351	-1.9013	0.0572628	0.735457
Gm20539	12.015	1.08129	0.569721	1.89792	0.0577065	0.73728
Rims4	96.8129	-0.438932	0.231584	-1.89535	0.0580466	0.73728
Magix	1400.01	-0.148003	0.0779787	-1.89799	0.0576973	0.73728
Ube2a	1493.35	0.14777	0.0780227	1.89394	0.0582331	0.73728
Nexmif	22.4427	0.762964	0.402622	1.89499	0.0580939	0.73728
X2810403D21Rik	60.9549	-0.470904	0.248434	-1.89549	0.0580275	0.73728
Mccc1os	82.1525	0.430859	0.226855	1.89927	0.0575294	0.73728
Dpm3	250.355	-0.234509	0.123596	-1.89738	0.0577779	0.73728
Unc13b	1233.21	0.163893	0.0864018	1.89687	0.0578452	0.73728
Plaa	2652.16	-0.157476	0.0831476	-1.89394	0.0582335	0.73728
Tfpi2	44.815	-0.560833	0.296131	-1.89386	0.0582432	0.73728
Hipk4	57.5543	-0.501152	0.264329	-1.89594	0.0579676	0.73728
Gsta4	2705.19	-0.146887	0.0773739	-1.89841	0.0576427	0.73728
Thoc5	819.42	-0.210108	0.11079	-1.89645	0.0579003	0.73728
Gm11425	82.1965	0.38086	0.200586	1.89873	0.0575994	0.73728
Acot4	87.5697	-0.590033	0.311439	-1.89454	0.0581537	0.73728
Rps19.ps6	255.88	0.436425	0.230077	1.89686	0.0578461	0.73728
Il7r	25.4353	0.688304	0.362952	1.89641	0.0579064	0.73728
Taf8	759.129	0.173983	0.0918021	1.8952	0.0580657	0.73728
Ptpn2	584.459	-0.174322	0.0918434	-1.89803	0.057692	0.73728
X6530402F18Rik	226.098	-0.27491	0.145228	-1.89296	0.0583633	0.738307
Psma5	1977.43	-0.161322	0.0852817	-1.89164	0.0585392	0.739368
Gm42807	9.12922	1.73983	0.919555	1.89203	0.0584864	0.739368
Rad54b	14.1246	1.01561	0.53705	1.89109	0.0586129	0.739368
Nppa	41433.4	0.260074	0.137547	1.8908	0.0586515	0.739368
Mill2	647.933	0.215719	0.11408	1.89094	0.0586324	0.739368
Slc36a1	743.726	0.187374	0.0991094	1.89057	0.0586813	0.739368
Bub1b	93.7661	0.551001	0.291681	1.88905	0.0588848	0.740259
Il1b	21.3357	-0.754744	0.399573	-1.88888	0.0589082	0.740259
Bche	1548.12	0.556693	0.29466	1.88927	0.0588553	0.740259
Socs2	1695.91	-0.214955	0.113793	-1.889	0.0588919	0.740259
Krt19	173.678	0.340792	0.180466	1.8884	0.0589721	0.74057
Gm37090	141.914	0.310727	0.164639	1.88732	0.0591172	0.741901
Gm12216	95.5143	0.410606	0.217603	1.88695	0.0591671	0.742037
Rad21	5082.48	0.136217	0.0722115	1.88635	0.0592472	0.742549
Rnf38	1219	0.167018	0.0886204	1.88464	0.0594781	0.743338
Snord55	7.08557	-1.25723	0.66727	-1.88414	0.0595455	0.743338
Ipo5	9580.75	-0.176266	0.0935383	-1.88443	0.0595074	0.743338
Rock2	7695.93	0.125579	0.0666126	1.88522	0.0594006	0.743338
Pacs2	2727.5	-0.212489	0.112722	-1.88507	0.0594209	0.743338
Ccdc167	249.425	0.304648	0.161634	1.8848	0.0594571	0.743338
Dsc2	2857.58	0.148391	0.0787755	1.88372	0.0596024	0.743559
Prkcd	869.098	-0.187995	0.0998322	-1.88311	0.059685	0.7441
Psmc5	4190.07	-0.165143	0.0877353	-1.88229	0.059797	0.745005
Coq4	482.128	0.191334	0.101699	1.88138	0.0599201	0.745185
Adam22	724.842	0.204134	0.108539	1.88073	0.060008	0.745185
Relt	131.947	-0.487847	0.25932	-1.88126	0.0599366	0.745185
Zfp944	355.365	0.215694	0.114678	1.88087	0.059989	0.745185
Lclat1	7618.93	0.203031	0.107902	1.88163	0.0598866	0.745185
Flrt2	472.418	0.208008	0.110671	1.87951	0.0601748	0.746766
Rbm15	432.054	-0.227698	0.121173	-1.87912	0.0602281	0.746939
Per2	1134.59	0.560311	0.298407	1.87767	0.0604257	0.747261
Adora1	784.947	0.276229	0.147458	1.87327	0.0610316	0.747261
Mndal	1258	0.193169	0.102994	1.87553	0.0607196	0.747261
Maged1	6556.94	0.132504	0.0706394	1.87577	0.0606864	0.747261
Sypl2	47.2203	0.591108	0.315522	1.87343	0.0610095	0.747261
Exosc3	599.456	-0.239484	0.127785	-1.87412	0.0609137	0.747261
Fktn	1918.93	0.174503	0.0932042	1.87227	0.0611699	0.747261
Fabp3	103014	-0.144673	0.0770875	-1.87674	0.0605543	0.747261
A330058E17Rik	24.5304	-0.703766	0.374943	-1.87699	0.0605188	0.747261
Oas1g	62.6713	0.711439	0.378988	1.87721	0.0604895	0.747261
Herc3	2065.13	-0.246075	0.131168	-1.87603	0.060651	0.747261
AA474408	30.1134	0.64363	0.343968	1.87119	0.0613188	0.747261
Gm8355	597.853	-0.364372	0.194605	-1.87237	0.0611558	0.747261
Amh	10.8369	-1.12812	0.602753	-1.87162	0.0612591	0.747261
Cd209a	13.7382	-1.0956	0.585309	-1.87183	0.0612306	0.747261
Proz	28.2161	0.637415	0.339627	1.87681	0.060544	0.747261
Sap30	364.321	0.211284	0.112516	1.87781	0.0604067	0.747261
X2810402E24Rik	200.835	-0.279342	0.148961	-1.87527	0.0607554	0.747261
Mmp13	43.8497	-0.660568	0.352761	-1.87257	0.0611282	0.747261
Arhgap32	1106.12	0.165171	0.0880957	1.87491	0.0608055	0.747261
Fam214a	2455.27	0.167009	0.0892467	1.87132	0.0613003	0.747261
Tmem108	201.68	0.309415	0.165175	1.87326	0.0610328	0.747261
Adap2os	39.3393	-0.647351	0.345357	-1.87444	0.0608701	0.747261
Bag5	1005.66	-0.18578	0.0992672	-1.87151	0.0612743	0.747261
Sdf2l1	237.176	0.414246	0.220505	1.87862	0.0602965	0.747261
Tut1	586.012	-0.211703	0.113094	-1.87192	0.0612176	0.747261
mt.Ta	82.4525	0.633373	0.337967	1.87407	0.0609209	0.747261
Rhbdd1	819.023	0.162106	0.086675	1.87028	0.0614454	0.748075
Gm11266	125.945	0.371988	0.198953	1.86973	0.0615213	0.748075
Pdpn	255.902	0.247749	0.132516	1.86957	0.0615435	0.748075
AC151284.2	193.04	0.282045	0.150837	1.86986	0.061503	0.748075
Foxq1	10.9643	1.1032	0.590178	1.86927	0.0615851	0.748101
Vasp	1461.81	-0.174359	0.0933621	-1.86756	0.0618237	0.749761
Gm26896	27.748	0.62682	0.335658	1.86744	0.0618405	0.749761
Frat2	172.484	0.34463	0.184531	1.8676	0.0618183	0.749761
Gm29346	20.4604	-0.75868	0.407029	-1.86395	0.0623292	0.750203
Ctnnbl1	691.244	-0.199879	0.107106	-1.86618	0.0620168	0.750203
Intu	2137.77	0.172995	0.0927837	1.8645	0.062251	0.750203
Gm7890	6.51615	-1.44457	0.774586	-1.86496	0.0621866	0.750203
Gm44386	803.715	-0.277239	0.148579	-1.86594	0.0620494	0.750203
Clpb	4297.32	-0.136525	0.073225	-1.86446	0.0622568	0.750203
Mfap3l	778.349	0.310902	0.166668	1.8654	0.0621257	0.750203
Lrrc18	16.055	0.855544	0.458347	1.86659	0.0619595	0.750203
Gpd1l	3633.89	-0.152871	0.0820342	-1.8635	0.0623915	0.750203
Slfn1	26.5427	0.693186	0.371914	1.86383	0.0623455	0.750203
Wrnip1	1371.66	0.184587	0.0989814	1.86486	0.0622004	0.750203
Prlr	435.3	-0.247495	0.132611	-1.86632	0.0619964	0.750203
Ndst1	3256.87	-0.123608	0.0663226	-1.86374	0.0623578	0.750203
Pdcl3	2164.66	-0.213734	0.114749	-1.86263	0.062515	0.750735
Gm37226	18.954	-0.86483	0.464265	-1.8628	0.062491	0.750735
Kif18a	56.921	0.471869	0.253375	1.86233	0.0625562	0.750754
Srrm4	775.059	-0.261374	0.140481	-1.86057	0.062805	0.753262
Gm37127	15.3124	-0.947893	0.50972	-1.85964	0.062937	0.754369
Taf1a	949.488	-0.168824	0.0908864	-1.85753	0.0632361	0.754612
Tbx3os1	95.5429	-0.443896	0.238963	-1.85759	0.0632271	0.754612
Acadsb	8540.05	-0.185859	0.100055	-1.85757	0.0632296	0.754612
Nt5dc3	2746.95	-0.163542	0.0880347	-1.85769	0.0632125	0.754612
Sesn3	1386.5	0.190104	0.102326	1.85782	0.0631939	0.754612
Spc24	182.849	-0.329189	0.177074	-1.85905	0.0630202	0.754612
X1700037C18Rik	77.9647	0.387282	0.208428	1.85811	0.0631531	0.754612
Slc25a5	10278.8	0.157675	0.0849309	1.85651	0.0633805	0.75586
Ublcp1	1352.31	-0.168667	0.0908676	-1.85618	0.0634278	0.755947
Morc3	921.971	0.163873	0.0883219	1.8554	0.0635386	0.756793
Tbc1d10c	437.011	0.198982	0.107269	1.85498	0.0635994	0.757041
Car5b	90.0045	-0.58789	0.317045	-1.85428	0.0636987	0.757747
Nbea	1455.01	0.137068	0.0739651	1.85314	0.063862	0.757787
Amd1	5054.46	-0.161464	0.0871085	-1.8536	0.0637964	0.757787
Rnf130	2105.15	-0.150712	0.081324	-1.85323	0.0638487	0.757787
Ankrd55	33.764	-0.903096	0.487329	-1.85315	0.0638603	0.757787
Ncapd3	1189.94	0.15326	0.0827379	1.85236	0.0639746	0.758321
Gpr137b.ps	476.058	-0.190528	0.102862	-1.85227	0.0639871	0.758321
Hcfc1r1	2726.32	0.188632	0.101862	1.85185	0.064047	0.758557
X1700029J07Rik	176.08	-0.395092	0.213396	-1.85145	0.0641047	0.758766
Nsun7	6.89523	1.34267	0.725664	1.85027	0.0642748	0.759603
Helt	42.5983	-0.69562	0.375986	-1.85012	0.0642957	0.759603
Plet1	66.5076	0.432746	0.233868	1.85039	0.0642579	0.759603
Stk16	1196.9	0.183229	0.099094	1.84904	0.0644514	0.760494
Ttpa	47.6887	-0.524435	0.283608	-1.84916	0.0644352	0.760494
Irx4	1787.62	0.209164	0.113189	1.84793	0.0646128	0.761924
Gm14890	45.1884	0.636599	0.34488	1.84586	0.0649128	0.76321
Cox6b1	18833.7	0.113202	0.0613385	1.84554	0.0649597	0.76321
Dhrs7c	5946.1	0.190604	0.103243	1.84617	0.0648674	0.76321
Gm9910	15.1456	0.848399	0.45971	1.84551	0.0649634	0.76321
Vars	1943.76	-0.199463	0.108073	-1.84563	0.0649465	0.76321
Afap1l2	211.956	-0.316843	0.171683	-1.84551	0.0649634	0.76321
Afg3l2	8491.46	-0.116948	0.0633842	-1.84506	0.0650287	0.763503
Smim1	307.093	0.238111	0.129098	1.84443	0.0651208	0.764111
Ppig	2059.88	-0.125443	0.068129	-1.84125	0.0655847	0.76442
Frmpd3	109.136	0.578164	0.313614	1.84355	0.0652484	0.76442
Tyw3	192.212	0.265544	0.144131	1.84238	0.0654194	0.76442
Gm13301	15.251	-0.905917	0.492023	-1.84121	0.0655909	0.76442
Ccdc30	14.9507	-0.851359	0.461756	-1.84374	0.0652205	0.76442
Steap2	77.5785	0.465636	0.252797	1.84193	0.0654848	0.76442
Cxcl10	27.748	0.840375	0.456361	1.84147	0.0655527	0.76442
Supt5	4670.18	-0.187167	0.101537	-1.84334	0.0652797	0.76442
Fancf	70.2397	0.428178	0.232421	1.84226	0.0654376	0.76442
Gm42432	23.5144	-0.761385	0.413119	-1.84302	0.0653265	0.76442
Klf11	681.141	-0.278165	0.151064	-1.84138	0.0655662	0.76442
Ddi2	2154.36	-0.144965	0.0787683	-1.8404	0.0657092	0.765329
Cops5	2755.44	-0.134137	0.07297	-1.83825	0.0660254	0.765473
Plag1	210.429	0.245745	0.133721	1.83775	0.0660997	0.765473
Srd5a3	394.413	0.230186	0.12519	1.8387	0.0659588	0.765473
Ddx54	1396.01	-0.144459	0.0785136	-1.83992	0.0657803	0.765473
Cux1	4468.72	0.158894	0.0864083	1.83887	0.0659343	0.765473
Gm43598	23.5995	0.755648	0.411221	1.83757	0.0661256	0.765473
Npat	594.816	0.17095	0.0930065	1.83805	0.0660553	0.765473
Ccnjl	33.9049	-0.688802	0.374538	-1.83907	0.0659043	0.765473
X1110002L01Rik	134.174	0.310888	0.169164	1.83779	0.0660936	0.765473
Riok3	3579.11	-0.167246	0.0909902	-1.83807	0.0660523	0.765473
Ccdc32	547.546	-0.173293	0.0944043	-1.83565	0.0664093	0.766287
Brwd3	352.026	0.26168	0.142523	1.83605	0.0663497	0.766287
Zfp827	780.374	0.183373	0.0999047	1.83548	0.0664348	0.766287
Mcpt4	86.2307	-0.514011	0.280082	-1.83522	0.0664734	0.766287
Rpp25	169.587	0.286728	0.156182	1.83585	0.0663793	0.766287
Slc25a48	6.75871	2.12286	1.15676	1.83518	0.0664789	0.766287
Dubr	372.447	0.243679	0.132751	1.8356	0.0664167	0.766287
Msra	1773.73	0.146931	0.0800767	1.83488	0.0665234	0.766333
Gbp7	1317.44	0.536879	0.292723	1.83408	0.0666414	0.766458
X4930522O17Rik	9.80083	-1.12819	0.61498	-1.83452	0.0665764	0.766458
X2310010J17Rik	82.29	-0.373941	0.203895	-1.83399	0.0666555	0.766458
Ube2g2	2988.93	-0.126059	0.0687596	-1.83333	0.0667534	0.766652
Gm18119	51.9694	0.786601	0.429049	1.83336	0.0667492	0.766652
Myrf	325.166	-0.262895	0.143437	-1.83282	0.0668287	0.767052
Fzd7	711.089	0.162869	0.0888967	1.83212	0.0669342	0.767482
Inhbb	185.173	-0.298031	0.163008	-1.82832	0.0675012	0.767482
Capn3	109.692	-0.400826	0.219101	-1.82941	0.0673385	0.767482
Mios	1157.6	-0.211105	0.115457	-1.82843	0.0674849	0.767482
Rtkn	186.468	0.364271	0.199089	1.82969	0.067296	0.767482
Cox6a2	39712	0.127749	0.0697925	1.83041	0.0671894	0.767482
Tjp3	11.4215	-1.05072	0.573907	-1.83083	0.0671262	0.767482
Washc3	633.767	-0.192032	0.104974	-1.82932	0.0673518	0.767482
Higd1b	250.695	-0.320032	0.175027	-1.82848	0.067478	0.767482
BB123696	18.5832	-1.01855	0.556288	-1.83097	0.0671045	0.767482
X2210408I21Rik	131.208	-0.377038	0.206195	-1.82856	0.0674661	0.767482
Ighd	39.6969	-0.821435	0.448648	-1.83091	0.0671133	0.767482
Ndrg1	1728.85	-0.181456	0.0992291	-1.82865	0.0674516	0.767482
Srebf2	1885.51	0.173578	0.0948476	1.83007	0.0672392	0.767482
Ptprs	3904.61	0.271794	0.148664	1.82824	0.0675141	0.767482
Scd2	1206.67	0.211466	0.11566	1.82835	0.0674972	0.767482
Mid1	155.994	-0.359823	0.196987	-1.82663	0.0677547	0.767795
Nupr1l	26.8298	0.653948	0.357884	1.82726	0.0676605	0.767795
Lgals4	2243.52	-0.560631	0.306945	-1.82648	0.0677773	0.767795
Cdh23	421.265	-0.283883	0.155404	-1.82675	0.067738	0.767795
X4930513N10Rik	44.768	0.5611	0.30712	1.82698	0.0677034	0.767795
Myc	158.51	-0.480972	0.263339	-1.82644	0.0677847	0.767795
Apmap	1757.41	-0.178139	0.0975531	-1.82607	0.067839	0.76795
Zfp456	27.9455	0.636818	0.348861	1.82542	0.0679379	0.768273
St3gal6	1549.36	-0.173277	0.0949283	-1.82535	0.0679486	0.768273
Plxna2	2450.56	-0.160915	0.088186	-1.82472	0.0680431	0.768424
Trpm7	3761.38	0.138641	0.0759791	1.82472	0.0680426	0.768424
Slc39a13	1356.86	0.178547	0.0979067	1.82364	0.0682058	0.768994
Tes	137.017	-0.34619	0.189852	-1.82348	0.0682312	0.768994
Rpl34.ps1	83.0293	0.391612	0.21471	1.82391	0.0681654	0.768994
Cisd3	1480.8	0.169152	0.0927838	1.82307	0.0682923	0.768994
Syk	1857.41	0.14361	0.0787747	1.82305	0.0682964	0.768994
Gm8349	8.24903	-1.67658	0.921471	-1.81945	0.0688421	0.771464
A930005H10Rik	146.935	0.468755	0.257565	1.81994	0.0687675	0.771464
Ccne2	139.457	0.342569	0.188193	1.82031	0.0687119	0.771464
Nbl1	863.538	-0.193318	0.106216	-1.82004	0.0687534	0.771464
Gm16089	204.363	0.253829	0.139535	1.8191	0.0688955	0.771464
X9130019O22Rik	144.528	0.317922	0.174605	1.82081	0.0686364	0.771464
Sipa1l2	3840.72	0.217879	0.119802	1.81866	0.0689636	0.771464
Lrtm1	18037.6	-0.177817	0.0977573	-1.81896	0.0689175	0.771464
Nln	797.877	-0.206859	0.113652	-1.82012	0.0687414	0.771464
Slc25a29	417.033	0.257645	0.141638	1.81903	0.0689064	0.771464
Brf1	1259	-0.188707	0.103758	-1.81872	0.0689548	0.771464
Tbccd1	581.982	0.230836	0.126995	1.81768	0.0691136	0.772686
Mid2	1183.72	0.162811	0.0896527	1.81602	0.0693671	0.773388
Gm42937	70.7357	-0.474072	0.2611	-1.81567	0.0694212	0.773388
Cd209f	58.1835	-0.798722	0.439654	-1.81671	0.0692622	0.773388
Gm12250	152.489	1.44182	0.793698	1.81659	0.0692806	0.773388
Arhgap27	777.311	-0.206083	0.113499	-1.81574	0.0694108	0.773388
Cdkn1a	876.261	-0.559883	0.308261	-1.81626	0.0693302	0.773388
Gm42940	108.567	-0.342482	0.188662	-1.81532	0.0694742	0.773429
Tmem147os	96.4881	0.343941	0.189488	1.81511	0.0695065	0.773429
Zmynd8	2898.97	0.120378	0.0664249	1.81224	0.0699485	0.774899
Gm14443	34.4418	0.579079	0.319547	1.81219	0.0699574	0.774899
Bmx	241.367	0.254601	0.140487	1.81228	0.0699434	0.774899
Cachd1	213.676	0.263558	0.145383	1.81286	0.0698535	0.774899
Gm15880	6.68548	-1.24802	0.688367	-1.81302	0.069829	0.774899
Gm10110	416.922	-0.225898	0.124659	-1.81213	0.0699658	0.774899
X9130213A22Rik	7.22526	1.39676	0.770665	1.8124	0.0699239	0.774899
Inf2	1197.27	-0.223021	0.123053	-1.8124	0.0699237	0.774899
Gbp3	1100.4	0.61245	0.338111	1.81139	0.070081	0.775722
Gm4609	53.5002	-1.52126	0.840259	-1.81046	0.0702241	0.775792
Gga2	2402.77	-0.17875	0.098764	-1.80987	0.0703161	0.775792
Gm45163	86.5579	0.456438	0.252117	1.81042	0.0702303	0.775792
Scn4b	2454.04	-0.484075	0.267324	-1.81082	0.0701688	0.775792
Gm19605	169.273	0.297497	0.164385	1.80976	0.070333	0.775792
X9930021J03Rik	1173.8	0.141107	0.0779592	1.81001	0.0702937	0.775792
Dusp7	2724.6	0.239689	0.132514	1.80878	0.0704853	0.77702
Tbck	565.209	0.168806	0.0933675	1.80797	0.0706109	0.777048
Odc1	2467.01	-0.151223	0.0836245	-1.80836	0.0705511	0.777048
Adcy9	1463.65	-0.166824	0.0922696	-1.80801	0.0706053	0.777048
Cldnd1	1599.47	-0.16017	0.08864	-1.80698	0.0707659	0.778302
Idh2	87611.8	-0.221692	0.122707	-1.80668	0.0708121	0.778358
Bex1	71.9848	0.421526	0.233423	1.80584	0.070943	0.779141
Gfod1	2267.2	-0.128774	0.0713153	-1.8057	0.0709656	0.779141
Dnajb6	3256.64	-0.157729	0.0873699	-1.80529	0.0710286	0.779249
Lrmda	36.2906	-0.599435	0.332077	-1.80511	0.0710577	0.779249
Plcl1	368.717	0.219283	0.121504	1.80474	0.0711156	0.779433
Hpcal1	582.042	-0.171366	0.0949736	-1.80436	0.0711753	0.779637
Usp15	4249.73	-0.125894	0.0697932	-1.80382	0.0712597	0.78011
Izumo4	240.6	0.319179	0.176987	1.80341	0.0713244	0.780368
Il27ra	148.002	0.369192	0.204778	1.80289	0.0714054	0.780803
Foxc1	382.168	0.202873	0.112561	1.80234	0.0714912	0.78129
Lmod1	192.693	-0.341504	0.189571	-1.80146	0.0716305	0.781911
Hpn	114.713	-0.466074	0.258685	-1.80171	0.0715914	0.781911
Tmem38b	1423.02	-0.211492	0.117508	-1.79981	0.0718913	0.782694
Mthfd1l	89.7071	0.477052	0.26504	1.79992	0.0718725	0.782694
Dnajc3	2693.3	-0.141441	0.0785914	-1.7997	0.0719087	0.782694
D430019H16Rik	82.2528	0.479883	0.266507	1.80064	0.0717598	0.782694
Rubcn	2676.2	0.133345	0.0740821	1.79996	0.0718673	0.782694
Rtl8b	711.232	0.218616	0.121536	1.79877	0.0720553	0.783839
Gm37125	10.417	-1.04142	0.579302	-1.79772	0.0722212	0.784599
Hook1	1199.47	-0.165896	0.0922901	-1.79754	0.0722494	0.784599
Stac	9.56056	-1.08411	0.603095	-1.79758	0.0722439	0.784599
C3ar1	361.917	0.277931	0.154643	1.79725	0.0722967	0.784663
Phf10	1790.38	-0.141778	0.0789106	-1.79668	0.0723857	0.78518
Etfdh	32025.9	-0.132888	0.0740363	-1.7949	0.0726699	0.78533
Psmd4	4318.05	-0.226796	0.126385	-1.79449	0.0727344	0.78533
Clec2l	33.8738	-0.676704	0.377151	-1.79425	0.0727726	0.78533
Rbpj.ps3	23.4516	-0.713012	0.397051	-1.79577	0.0725312	0.78533
Dnaja2	12922.6	-0.161469	0.0899688	-1.79472	0.0726979	0.78533
Nkiras1	1115.56	-0.132551	0.0738088	-1.79587	0.0725152	0.78533
Sdhd	17408.5	0.106745	0.0594556	1.79537	0.0725943	0.78533
Gm26384	28.8785	0.615035	0.342439	1.79604	0.0724874	0.78533
Nrap	29554.9	-0.286129	0.159429	-1.79472	0.0726989	0.78533
Gm19461	484.023	0.234511	0.130784	1.79312	0.0729544	0.786397
Hoga1	32.1783	-0.654526	0.364995	-1.79325	0.0729335	0.786397
Gdnf	16.8161	0.891468	0.497251	1.79279	0.0730063	0.786509
Sdhaf3	375.639	-0.202813	0.113159	-1.79229	0.0730869	0.78693
Dpm2	496.644	0.176097	0.0983312	1.79085	0.073317	0.787657
Atad3a	2746.68	-0.199225	0.111291	-1.79013	0.0734336	0.787657
BC017158	334.361	0.195011	0.108862	1.79137	0.0732343	0.787657
Fuom	930.654	0.16519	0.0922578	1.79053	0.0733685	0.787657
Gm20757	16.2323	-0.896797	0.500757	-1.79088	0.073312	0.787657
Gm43305	313.765	0.422317	0.235887	1.79034	0.0733999	0.787657
Clec10a	156.974	-0.327158	0.182765	-1.79005	0.0734454	0.787657
Mreg	1164.98	-0.148689	0.0831607	-1.78797	0.0737813	0.787781
Dapp1	638.548	0.196679	0.11002	1.78766	0.0738311	0.787781
Reep1	1469.26	0.253123	0.141581	1.78783	0.0738028	0.787781
Usb1	559.977	0.191954	0.107338	1.7883	0.0737269	0.787781
Fxr2	6347.05	-0.13408	0.0749759	-1.78831	0.0737259	0.787781
Gli3	107.318	0.383813	0.214517	1.7892	0.0735824	0.787781
Ercc6l2	750.135	0.154739	0.0864803	1.7893	0.0735667	0.787781
Ddx1	4573.46	-0.211618	0.118377	-1.78766	0.0738303	0.787781
Heatr5a	1892.1	0.169999	0.0950887	1.78779	0.07381	0.787781
Bcl2	331.879	-0.243543	0.136357	-1.78606	0.0740888	0.788288
Gm13341	12843.3	-0.253711	0.142121	-1.78518	0.074232	0.788288
Gpd2	1163.97	0.255677	0.143167	1.78587	0.0741204	0.788288
Gm6568	14.9217	-0.799029	0.447628	-1.78503	0.0742569	0.788288
Amy1	615.809	-0.702018	0.393667	-1.78328	0.0745408	0.788288
Odf2l	519.318	0.189477	0.106057	1.78655	0.0740102	0.788288
Mdn1	939.045	-0.166431	0.0932783	-1.78425	0.0743838	0.788288
Gne	1237.79	0.157898	0.0885106	1.78394	0.0744328	0.788288
Cd8b1	9.41668	1.4382	0.805679	1.78508	0.0742486	0.788288
Clec2d	485.973	0.192495	0.107768	1.78621	0.0740652	0.788288
Gprc5b	1138.54	0.146398	0.082051	1.78423	0.0743857	0.788288
D830039M14Rik	253.615	-0.276403	0.154793	-1.78563	0.0741594	0.788288
Hspb2	1777.77	0.141392	0.0792614	1.78386	0.0744457	0.788288
Etfa	34580.7	-0.161901	0.0907819	-1.78341	0.0745203	0.788288
F13a1	2696.4	0.186717	0.104607	1.78494	0.0742713	0.788288
Ctdp1	617.509	-0.183521	0.102913	-1.78326	0.0745441	0.788288
Selenow	5164.82	-0.157302	0.0882405	-1.78265	0.0746434	0.78833
Sp2	681.388	0.17526	0.098312	1.78269	0.0746363	0.78833
Ly6c2	30.577	0.693233	0.388917	1.78247	0.0746729	0.78833
Gm7592	13.9708	1.04255	0.585373	1.781	0.074913	0.78845
Lefty1	78.9439	0.42493	0.239062	1.77748	0.0754885	0.78845
Eprs	5504.8	-0.148435	0.0833083	-1.78176	0.074789	0.78845
Rad51	41.1257	0.662055	0.372099	1.77925	0.0751995	0.78845
B2m	10095.8	0.28185	0.158424	1.77908	0.0752259	0.78845
Rbl1	201.689	0.31042	0.174753	1.77634	0.0756766	0.78845
Gpr160	109.123	-0.461313	0.25957	-1.77722	0.0755323	0.78845
Mthfr	791.376	-0.178295	0.100296	-1.77769	0.0754547	0.78845
Mafk	2333.59	-0.238049	0.133953	-1.77711	0.0755502	0.78845
Rpl30.ps1	246.804	-0.293028	0.164603	-1.78021	0.0750415	0.78845
Prr15	74.5544	0.408097	0.22923	1.7803	0.0750274	0.78845
Luzp2	31.2676	-0.65057	0.366112	-1.77697	0.0755733	0.78845
Syde1	984.278	0.150512	0.0847311	1.77635	0.075675	0.78845
Adgrg3	88.8151	-0.356661	0.200667	-1.77738	0.0755058	0.78845
Ptpn9	719.828	-0.183761	0.103452	-1.7763	0.0756829	0.78845
Map4	18793.4	-0.168766	0.0947652	-1.78088	0.0749314	0.78845
Map2k3	2964.27	-0.1344	0.0755873	-1.77807	0.0753924	0.78845
Ccdc47	5979.61	-0.133045	0.0748544	-1.77738	0.0755054	0.78845
Card6	390.193	0.184819	0.103839	1.77986	0.0750993	0.78845
AC131339.2	4904.67	-0.154311	0.0866891	-1.78005	0.0750676	0.78845
D330041H03Rik	116.275	0.503256	0.282947	1.77862	0.0753019	0.78845
Gfer	619.542	-0.198471	0.111723	-1.77646	0.0756575	0.78845
Mapk8ip3	5253.55	0.113459	0.0637485	1.77979	0.0751097	0.78845
Dtx4	390.396	-0.222803	0.125165	-1.78007	0.0750642	0.78845
Pyurf	1566.59	0.168564	0.0949333	1.7756	0.0757983	0.788785
X4930404H11Rik	9.15437	-1.07733	0.606662	-1.77584	0.0757597	0.788785
Sned1	1189.46	0.267704	0.150854	1.77459	0.0759658	0.790094
Fsd1l	2907.77	-0.117098	0.0660029	-1.77414	0.0760402	0.790435
Gm17082	13.7086	1.01227	0.571157	1.77232	0.0763418	0.790556
Vsig2	262.741	-0.252167	0.1422	-1.77332	0.0761754	0.790556
Pfkp	2806.83	-0.160429	0.0905155	-1.77239	0.0763301	0.790556
Sdc1	297.533	-0.262533	0.148131	-1.77231	0.0763439	0.790556
Tshr	10.5746	-1.17548	0.663203	-1.77243	0.0763228	0.790556
Rpp21	535.919	0.198626	0.112027	1.77302	0.0762252	0.790556
Bicral	799.974	0.158033	0.0891067	1.77352	0.0761425	0.790556
Cr2	18.6993	-1.08782	0.614254	-1.77095	0.0765684	0.790866
Ubr3	12700	-0.132541	0.0748126	-1.77163	0.0764553	0.790866
Hip1	2840.42	0.141592	0.0799333	1.77138	0.076498	0.790866
Trmt1	1505.29	-0.200933	0.113463	-1.77092	0.0765748	0.790866
Trp53cor1	13.2602	0.912479	0.515272	1.77087	0.0765825	0.790866
Il18rap	16.444	-0.779626	0.440654	-1.76925	0.0768523	0.792112
Ikzf4	44.0892	-0.501478	0.283455	-1.76916	0.0768669	0.792112
St3gal2	1938.59	-0.126736	0.0716472	-1.76889	0.0769122	0.792112
Prss51	7.87345	-1.25747	0.710786	-1.76912	0.0768735	0.792112
Wdr5b	227.074	0.248326	0.140362	1.76918	0.0768635	0.792112
AC154540.2	28.2364	-0.715644	0.404792	-1.76793	0.0770726	0.793333
Gm4997	22.6285	-0.797869	0.451533	-1.76702	0.0772246	0.794123
Gadd45a	732.008	-0.23307	0.131922	-1.76672	0.0772751	0.794123
Daam2	816.194	-0.180184	0.101975	-1.76694	0.0772381	0.794123
Sdhc	21515.7	0.128393	0.0727379	1.76514	0.0775397	0.794804
Adamts14	58.2974	-0.522638	0.295991	-1.76573	0.0774419	0.794804
Acox1	16663	-0.251992	0.142726	-1.76557	0.0774686	0.794804
Ntsr2	308.897	0.366782	0.207756	1.76544	0.0774898	0.794804
Tap1	954.799	0.537703	0.304635	1.76508	0.0775511	0.794804
AC154779.2	27.3128	-0.606173	0.343478	-1.76481	0.0775958	0.794832
Gm37070	47.1173	-0.489202	0.27724	-1.76454	0.0776408	0.794864
X5930430L01Rik	180.388	0.334272	0.189496	1.764	0.0777316	0.794934
Gm20559	499.429	0.302346	0.171397	1.76401	0.0777304	0.794934
Gm6085	18.0295	-0.784576	0.444904	-1.76347	0.077821	0.795419
Chst12	308.234	-0.229149	0.130107	-1.76124	0.0781981	0.798843
Ice2	425.12	0.194531	0.110469	1.76096	0.0782452	0.798893
Gmpr	4922.24	0.127792	0.0725993	1.76024	0.0783674	0.79971
Zfp40	171.759	0.253993	0.144333	1.75977	0.078447	0.800092
Gm4951	142.226	0.509196	0.289431	1.7593	0.0785266	0.800473
Tox	45.2815	0.553496	0.31479	1.75831	0.0786956	0.801
E430018J23Rik	200.543	0.256953	0.146123	1.75847	0.0786676	0.801
Slc38a7	987.559	0.152674	0.0868575	1.75775	0.0787906	0.801
Spryd7	2201.39	0.160578	0.0913671	1.7575	0.0788319	0.801
Cdv3	5431.11	-0.151288	0.0860706	-1.75772	0.0787959	0.801
Abca3	1283.94	0.175849	0.100026	1.75803	0.0787427	0.801
Snx24	376.883	-0.200201	0.113989	-1.75632	0.0790341	0.802624
Plin5	6029.48	-0.237444	0.135244	-1.75567	0.0791453	0.803322
Smc2	252.663	0.33452	0.190595	1.75514	0.0792353	0.803376
Mmp15	7238.36	0.284185	0.161896	1.75536	0.0791983	0.803376
Pdia3	6513.83	0.131364	0.0748572	1.75486	0.0792825	0.803424
Slc19a3	28.9295	-0.719159	0.410254	-1.75296	0.079609	0.804242
Gm13422	19.4205	0.751456	0.428718	1.7528	0.0796364	0.804242
Gm5112	59.8592	0.40917	0.233456	1.75267	0.0796593	0.804242
Slco2b1	1001.83	-0.214404	0.122283	-1.75335	0.079542	0.804242
Lacc1	241.46	-0.270443	0.154182	-1.75405	0.0794217	0.804242
Itgbl1	572.05	-0.222054	0.12666	-1.75314	0.0795779	0.804242
Chrm3	72.0436	0.410289	0.234095	1.75266	0.0796603	0.804242
Metap1d	2303.96	0.131344	0.0749776	1.75177	0.079813	0.804926
Ankrd49	408.666	-0.177866	0.10153	-1.75185	0.0797997	0.804926
Apc2	496.059	0.210377	0.12015	1.75096	0.0799536	0.805915
Gdf6	31.2876	-0.628056	0.358813	-1.75037	0.0800547	0.806337
Cep97	364.154	0.202775	0.115857	1.75022	0.0800806	0.806337
X4930524J08Rik	8.24366	-1.05419	0.602417	-1.74993	0.0801306	0.806412
Carmil1	205.13	-0.396813	0.226838	-1.74932	0.0802356	0.807041
Bag3	10445.4	-0.19146	0.109504	-1.74843	0.0803898	0.807734
Sp1	1600.16	0.143953	0.0823305	1.74848	0.0803806	0.807734
Omd	81.1568	-0.524401	0.300027	-1.74785	0.0804905	0.808317
S1pr1	2659.45	-0.227913	0.130436	-1.74731	0.0805834	0.808822
Id3	2212.09	-0.169827	0.0972692	-1.74595	0.0808192	0.809294
Sel1l3	64.3131	0.494534	0.283311	1.74556	0.0808881	0.809294
Wnt5b	218.59	-0.270626	0.155046	-1.74546	0.080905	0.809294
Ppil6	53.8299	-0.573184	0.32832	-1.74581	0.0808438	0.809294
Nectin1	99.7438	-0.374712	0.214696	-1.74532	0.0809294	0.809294
Rpl23a	5246.91	0.196853	0.11274	1.74609	0.0807958	0.809294
Dnajc7	3460.88	-0.174128	0.099729	-1.74601	0.0808089	0.809294
Gna12	6821.73	-0.131254	0.0752442	-1.74437	0.081094	0.810085
Scara3	275.261	-0.266002	0.152491	-1.74438	0.0810931	0.810085
Lsmem2	689.541	-0.174882	0.100285	-1.74385	0.081186	0.810577
Hdlbp	31469.9	-0.117825	0.067633	-1.74212	0.081488	0.810967
Pacsin3	6895.04	-0.124353	0.0714343	-1.7408	0.0817188	0.810967
Srpk3	1429.04	0.148906	0.0855542	1.74049	0.0817728	0.810967
Ecpas	8735.85	-0.119003	0.0682985	-1.7424	0.0814382	0.810967
Sdad1	799.984	-0.197617	0.113542	-1.74048	0.0817747	0.810967
Ppp1r12c	3506.48	-0.148111	0.0850994	-1.74044	0.0817814	0.810967
Gins4	644.144	-0.195519	0.112269	-1.74152	0.0815928	0.810967
Sntb2	1163.05	0.174314	0.100047	1.74232	0.0814521	0.810967
Piezo1	1842.8	-0.13332	0.0765592	-1.74139	0.0816145	0.810967
Gm8894	12.0377	0.917901	0.527296	1.74077	0.0817237	0.810967
Natd1	700.998	0.19984	0.11476	1.74137	0.0816193	0.810967
Cep95	483.838	0.182389	0.10473	1.74151	0.0815935	0.810967
Baiap2l2	26.5974	0.68916	0.395732	1.74148	0.0815994	0.810967
Hist2h3c2	36.5477	0.524903	0.301756	1.73949	0.0819482	0.811969
Acad10	392.43	0.224221	0.128909	1.73938	0.0819681	0.811969
Gm4956	68.783	0.537125	0.308901	1.73882	0.0820659	0.812163
Gm13340	68727.8	-0.271513	0.156151	-1.73878	0.0820735	0.812163
Ranbp9	1857.78	-0.18499	0.106452	-1.73778	0.0822499	0.813484
Polrmt	1790.72	-0.151708	0.0873246	-1.73729	0.0823359	0.81391
Gm33609	179.81	-0.445485	0.256537	-1.73654	0.0824693	0.814185
Pnp2	15.0427	0.85658	0.493289	1.73647	0.0824815	0.814185
Lrch1	982.426	0.131267	0.0755973	1.7364	0.0824926	0.814185
A530016L24Rik	1929.69	-0.203481	0.117236	-1.73566	0.0826242	0.814731
Adrb1	1457.07	0.204421	0.117781	1.7356	0.0826339	0.814731
Cldn12	1279.91	0.204578	0.117945	1.73451	0.0828274	0.816214
X6030442K20Rik	13.2525	0.873748	0.504055	1.73344	0.0830175	0.816768
Polr2e	3360.14	-0.210799	0.121594	-1.73363	0.0829835	0.816768
X6330537M06Rik	16.8588	0.759286	0.438077	1.73322	0.083056	0.816768
Gm12295	481.924	0.28551	0.164672	1.73381	0.0829511	0.816768
Nabp1	2825.5	-0.210365	0.121499	-1.73141	0.0833785	0.816816
Gm6430	21.4284	-0.750297	0.434592	-1.72644	0.0842678	0.816816
Gm25911	44.4382	-0.596066	0.344031	-1.73259	0.0831682	0.816816
G0s2	1581.22	0.20873	0.120793	1.728	0.0839883	0.816816
Camsap1	1719.17	-0.160236	0.0926679	-1.72914	0.0837836	0.816816
Fmn1	94.3242	-0.543761	0.314682	-1.72797	0.0839935	0.816816
Serf2	3808.94	0.114079	0.0660448	1.72729	0.084115	0.816816
Dpyd	627.159	-0.243644	0.140804	-1.73038	0.0835617	0.816816
Prpf4	998.523	-0.146056	0.0845689	-1.72706	0.0841567	0.816816
Tesc	3777.51	0.136229	0.078692	1.73116	0.0834227	0.816816
Gm43050	228.589	0.286147	0.165328	1.73079	0.0834892	0.816816
Gm8566	139.87	-0.322034	0.186004	-1.73133	0.0833937	0.816816
Retsat	3038.15	-0.237007	0.137111	-1.72858	0.0838839	0.816816
Zfp788	438.649	0.179115	0.103634	1.72835	0.0839252	0.816816
Ampd3	2094.45	0.182	0.105159	1.73071	0.0835042	0.816816
Gas2l3	102.315	0.322125	0.18604	1.73148	0.0833658	0.816816
Avpr1a	48.376	-0.584156	0.337565	-1.7305	0.0835414	0.816816
Cs	64625.4	0.120161	0.069425	1.73081	0.0834858	0.816816
Def8	3106.57	-0.136454	0.0789835	-1.72762	0.0840558	0.816816
Apex1	328.994	-0.212381	0.122875	-1.72843	0.0839115	0.816816
X4930480K23Rik	141.483	0.315597	0.182783	1.72662	0.0842351	0.816816
Gm34425	25.8524	0.63477	0.367315	1.72813	0.0839643	0.816816
Mprip	9207.41	-0.0998542	0.0577117	-1.73023	0.0835899	0.816816
Faap100	840.497	0.228766	0.132307	1.72905	0.0838004	0.816816
Jarid2	1459.21	0.218585	0.126346	1.73004	0.0836224	0.816816
Rps7	9652.91	-0.176284	0.102083	-1.72686	0.0841928	0.816816
Mgat3	279.921	-0.292966	0.169575	-1.72765	0.0840511	0.816816
Rsph9	31.5662	0.598561	0.346302	1.72844	0.0839096	0.816816
Fcnaos	14.1959	0.852247	0.49394	1.72541	0.0844544	0.818206
Cald1	2883.25	-0.139103	0.0806616	-1.72453	0.0846131	0.819029
A2m	66.5213	-0.468785	0.271883	-1.72422	0.084669	0.819029
Ear2	18.9053	-0.850591	0.493254	-1.72445	0.0846271	0.819029
Drp2	43.4538	-0.484646	0.28122	-1.72337	0.084822	0.81914
Adamts15	477.883	-0.281599	0.163352	-1.72387	0.0847308	0.81914
Slc26a6	868.885	0.227852	0.132226	1.72319	0.0848534	0.81914
Slc4a1	20.1639	-1.04618	0.607112	-1.72321	0.0848499	0.81914
Crb1	53.0522	-0.619436	0.359821	-1.72151	0.0851579	0.819158
Ackr1	9.12541	-1.01396	0.588923	-1.72172	0.0851206	0.819158
Dhcr24	145.365	0.33174	0.192696	1.72157	0.0851474	0.819158
Gm49041	14.4041	0.833939	0.484173	1.7224	0.0849975	0.819158
AC123956.1	60.8701	0.403686	0.234479	1.72163	0.0851369	0.819158
Tnfrsf12a	1396.58	-0.694641	0.403295	-1.72242	0.0849943	0.819158
H2.T23	1878.93	0.18523	0.107567	1.722	0.0850699	0.819158
X9330102E08Rik	147.744	-0.382315	0.222171	-1.72081	0.0852852	0.819967
Pcyt2	2141.44	-0.133075	0.0773589	-1.72023	0.0853908	0.820566
Cd28	217.337	-0.29987	0.174348	-1.71995	0.085442	0.820641
Proser2	355.032	-0.239671	0.139423	-1.71902	0.0856111	0.821017
Hmcn2	1721.79	-0.305487	0.177687	-1.71924	0.0855702	0.821017
Robo1	162.416	0.285342	0.165963	1.71931	0.0855582	0.821017
Cdon	822.819	0.175227	0.101966	1.71848	0.0857092	0.821283
Susd3	37.8422	-0.540699	0.314654	-1.71839	0.0857255	0.821283
Gm16124	38.6006	-0.530799	0.308939	-1.71813	0.0857726	0.821319
Tmpo	2313.68	0.129136	0.0752194	1.71679	0.086018	0.822008
Appl1	1967.23	0.117138	0.0682244	1.71696	0.0859869	0.822008
Serac1	657.571	0.186782	0.108791	1.71689	0.0859995	0.822008
Ccdc112	44.4902	-0.486806	0.283441	-1.71749	0.0858902	0.822008
Pex5l	51.7709	-0.489862	0.28548	-1.71593	0.0861754	0.822115
Gm19439	13.0654	-1.10596	0.64436	-1.71637	0.0860938	0.822115
Tac1	68.1918	-0.501723	0.292376	-1.71602	0.0861589	0.822115
Mlx	703.749	0.199038	0.116005	1.71578	0.0862028	0.822115
Dpy19l3	123.103	-0.337709	0.196867	-1.71542	0.0862684	0.822327
Thyn1	835.611	0.157547	0.0918563	1.71515	0.0863179	0.822385
Mplkip	238.417	0.233168	0.136001	1.71446	0.0864449	0.822512
Hist1h2bg	19.7683	0.852696	0.497263	1.71478	0.0863856	0.822512
Sfxn2	288.412	0.235345	0.137278	1.71437	0.0864614	0.822512
Gclc	906.933	-0.229622	0.133986	-1.71378	0.0865695	0.822714
Eif2ak2	745.55	0.236561	0.138017	1.71399	0.0865303	0.822714
Ppp1r3f	73.5	0.443492	0.259011	1.71225	0.0868511	0.822949
Ddx58	894.973	0.228958	0.133694	1.71256	0.0867944	0.822949
Hcar1	36.7724	-0.538197	0.314164	-1.71311	0.0866921	0.822949
Rabep2	549.17	0.184488	0.107744	1.71228	0.0868456	0.822949
Kcnq1	2498.24	0.211726	0.123619	1.71273	0.0867615	0.822949
[truncated: 20,977 more rows]

## Sheet: Male KO v Con
	baseMean	log2FoldChange (Con/KO)	lfcSE	stat	pvalue	padj
Gm6472	253.99	3.47707	0.211219	16.4619	6.89e-61	9.61e-57
Ppp1r3c	6127.13	-0.91465	0.0727503	-12.5725	2.99e-36	2.09e-32
Eps8l1	318.521	-3.46971	0.282155	-12.2972	9.38e-35	4.36e-31
Cited4	1178.56	-1.14202	0.10385	-10.9968	3.96e-28	1.38e-24
Pik3ip1	2782.46	0.901855	0.0835297	10.7968	3.56e-27	9.94e-24
Gm7993	129.303	3.42443	0.319382	10.7221	8.02e-27	1.86e-23
Myl1	2400.66	-1.25203	0.122097	-10.2544	1.13e-24	2.25e-21
Zbtb16	2055.78	1.96472	0.223277	8.79949	1.37e-18	2.4e-15
Adam19	2218.47	-1.0223	0.124789	-8.19218	2.57e-16	3.98e-13
Actb	9907.29	-0.723421	0.0897973	-8.05616	7.87e-16	1.1e-12
Ndrg4	15648.3	-1.02631	0.12861	-7.98	1.46e-15	1.86e-12
Alas1	11331.6	-1.1168	0.144719	-7.71704	1.19e-14	1.38e-11
Fbxw7	2513.5	-0.597163	0.0816807	-7.31094	2.65e-13	2.64e-10
E230013L22Rik	735.574	1.22508	0.16748	7.31475	2.58e-13	2.64e-10
Pnmal2	471.816	1.0611	0.146167	7.25952	3.88e-13	3.61e-10
Klf10	632.789	1.12739	0.15578	7.23708	4.58e-13	4e-10
Plin4	9835.26	0.700071	0.0983551	7.11779	1.1e-12	9e-10
Fam78a	1783.49	-0.96383	0.143634	-6.71031	1.94e-11	1.51e-08
Paqr4	1048.35	-0.92779	0.140059	-6.62429	3.49e-11	2.56e-08
Tns2	8158.5	0.587119	0.0889111	6.60344	4.02e-11	2.8e-08
Slc31a1	1653.25	-0.589082	0.0928346	-6.3455	2.22e-10	1.47e-07
Gadd45gip1	1357.6	-0.597665	0.0945017	-6.32438	2.54e-10	1.61e-07
Glul	17508.7	0.910537	0.146221	6.22714	4.75e-10	2.88e-07
Fam214a	1968.41	0.656802	0.105722	6.21256	5.21e-10	3.03e-07
Herpud1	8314.43	0.49113	0.0793186	6.19187	5.95e-10	3.32e-07
Xdh	5521.64	0.949225	0.155104	6.11993	9.36e-10	5.02e-07
Hecw2	912.829	0.932484	0.153356	6.0805	1.2e-09	6.18e-07
Foxo3	4857.3	0.69786	0.114876	6.07492	1.24e-09	6.18e-07
Tcp11l2	6820.31	0.762188	0.126578	6.02149	1.73e-09	8.31e-07
Irf2bp2	1769.92	-0.540617	0.0904196	-5.97898	2.25e-09	1.04e-06
Blvrb	542.286	0.773749	0.129758	5.96302	2.48e-09	1.11e-06
Klf11	521.139	0.780752	0.131022	5.95892	2.54e-09	1.11e-06
Rptn	616.556	-25.8031	4.40749	-5.85437	4.79e-09	2.02e-06
Akirin1	1597.7	-0.512479	0.0880843	-5.81805	5.95e-09	2.44e-06
Sprr3	502.328	-25.5205	4.40751	-5.79023	7.03e-09	2.65e-06
Apold1	406.906	-0.972755	0.16798	-5.79088	7e-09	2.65e-06
Gja1	17562.4	-0.493401	0.0851969	-5.7913	6.98e-09	2.65e-06
Amd2	131.184	2.05136	0.354645	5.78426	7.28e-09	2.67e-06
Tcap	43940.6	0.703145	0.121808	5.77259	7.81e-09	2.79e-06
Ip6k3	668.7	-0.891264	0.154786	-5.75803	8.51e-09	2.97e-06
Slc27a1	10503.3	0.715644	0.12537	5.70826	1.14e-08	3.88e-06
Kpna2	1659.44	-0.561187	0.0988927	-5.6747	1.39e-08	4.61e-06
X4930480K23Rik	204.68	1.20878	0.213495	5.66188	1.5e-08	4.86e-06
Slc25a34	8902.71	0.556054	0.0986572	5.63622	1.74e-08	5.51e-06
Nedd9	1124.3	-0.586979	0.105272	-5.57581	2.46e-08	7.64e-06
Zfp131	1059.29	-0.657078	0.118013	-5.56783	2.58e-08	7.82e-06
AI464131	1067.42	0.563349	0.101372	5.55722	2.74e-08	8.14e-06
Gpr22	1918.52	-0.834139	0.150274	-5.55077	2.84e-08	8.27e-06
Mt1	4010.65	0.617905	0.112413	5.49673	3.87e-08	1.1e-05
Vegfa	16950.2	-0.438804	0.0799107	-5.49118	3.99e-08	1.11e-05
Asb2	26336.4	-0.39075	0.0714119	-5.47179	4.46e-08	1.22e-05
Tbc1d17	1646.38	0.628893	0.11531	5.45391	4.93e-08	1.32e-05
Casq2	41662.3	-0.634985	0.1166	-5.44586	5.16e-08	1.33e-05
Cpt1a	2680.02	0.701579	0.128787	5.4476	5.11e-08	1.33e-05
Lipe	2503.18	0.982284	0.181848	5.40167	6.6e-08	1.64e-05
Lgi1	163.334	-1.24119	0.229772	-5.40182	6.6e-08	1.64e-05
Art5	901.569	0.643793	0.120246	5.35395	8.61e-08	2.11e-05
Ccng2	1070.77	0.581595	0.110844	5.24699	1.55e-07	3.72e-05
Trabd2b	4425.04	-0.381266	0.0732182	-5.20727	1.92e-07	4.53e-05
Cd300lg	3802.95	0.492156	0.0945718	5.20405	1.95e-07	4.53e-05
X1110002E22Rik	4406.83	-0.486953	0.0941158	-5.17398	2.29e-07	5.24e-05
Pparg	578.539	0.79675	0.154396	5.16044	2.46e-07	5.54e-05
Penk	325.871	1.02993	0.200376	5.13996	2.75e-07	6.08e-05
Hspb6	31800.2	-0.50402	0.0982481	-5.13007	2.9e-07	6.31e-05
Maml3	280.965	0.868134	0.171318	5.06739	4.03e-07	8.66e-05
Ehhadh	894.076	0.74914	0.147951	5.06343	4.12e-07	8.7e-05
Sgk1	2457.34	-0.540351	0.107347	-5.03369	4.81e-07	0.000100173
Fnip2	1180.94	-0.537438	0.106853	-5.0297	4.91e-07	0.000100777
Rit1	2853.92	0.669734	0.133619	5.01227	5.38e-07	0.000107197
Serpine1	940.189	1.17709	0.234783	5.01351	5.34e-07	0.000107197
Igsf9b	404.713	-0.755225	0.151795	-4.9753	6.51e-07	0.000127997
Polq	517.957	-0.911943	0.184004	-4.95611	7.19e-07	0.000139344
Slc25a33	830.037	0.834691	0.168912	4.94158	7.75e-07	0.000148086
Pkdcc	1582.38	-0.488835	0.0991394	-4.93079	8.19e-07	0.000154391
Cish	3209.81	-0.637092	0.130447	-4.88393	1.04e-06	0.000193425
Tmem144	1997.15	0.488047	0.10014	4.87363	1.1e-06	0.000198502
Dhrs3	3010.58	0.374156	0.0767476	4.87515	1.09e-06	0.000198502
Mrps12	1381.79	-0.585177	0.120238	-4.86681	1.13e-06	0.000202837
Gpr157	3080.19	-0.479231	0.0987634	-4.85231	1.22e-06	0.000215487
Gm12295	334.128	0.95622	0.197629	4.83846	1.31e-06	0.000228162
Timp3	5561.12	0.474224	0.0981633	4.83097	1.36e-06	0.000233998
Npc1	2428.77	0.521312	0.107981	4.82781	1.38e-06	0.000234842
Adora1	632.526	0.772755	0.160676	4.80939	1.51e-06	0.00025445
Ccdc8	376.81	0.86431	0.180669	4.78394	1.72e-06	0.000285471
Hes1	940.037	0.475254	0.0995296	4.77501	1.8e-06	0.000294919
Gm5905	243.157	1.13895	0.239255	4.76038	1.93e-06	0.000313434
Fabp4	18142.8	0.63427	0.133444	4.75309	2e-06	0.00032122
Il15	1006.19	-0.676154	0.142726	-4.73743	2.16e-06	0.000343118
Pfkfb1	667.676	0.894831	0.189735	4.71621	2.4e-06	0.00037661
Tef	5729.32	0.444208	0.0942774	4.71172	2.46e-06	0.000380737
Krt13	6144.21	-11.815	2.51275	-4.70202	2.58e-06	0.000394891
Ppm1k	3763.4	0.456312	0.0971867	4.69521	2.66e-06	0.000403841
Hnrnpl	7538.54	0.424959	0.0911716	4.66109	3.15e-06	0.000471806
Auts2	1362.79	-0.738451	0.159607	-4.62669	3.72e-06	0.000551403
Ror1	400.862	-0.87703	0.189658	-4.62426	3.76e-06	0.000552032
Synpo	5219.33	0.433647	0.094218	4.60259	4.17e-06	0.00060634
Nkain1	350.989	-1.0082	0.219343	-4.59645	4.3e-06	0.000618054
Plekhh1	167.388	-1.17035	0.254783	-4.59351	4.36e-06	0.000620426
Igsf1	886.353	-1.00166	0.218353	-4.58735	4.49e-06	0.000632558
Prdm16	938.555	-0.560177	0.122719	-4.5647	5e-06	0.000697786
Trim35	4189.98	-0.517335	0.113663	-4.55146	5.33e-06	0.000735813
Klhl33	1824.31	0.884146	0.194493	4.54591	5.47e-06	0.000748081
Rsrp1	14033.5	0.299246	0.0660016	4.53393	5.79e-06	0.00078413
Perm1	15997.8	-0.350457	0.0774075	-4.52743	5.97e-06	0.000800857
Wdr1	5466.14	-0.451845	0.100087	-4.51454	6.35e-06	0.00084305
Fam222a	171.489	-1.02129	0.226683	-4.50538	6.63e-06	0.000871933
Krt4	6247.25	-11.1046	2.46786	-4.49968	6.81e-06	0.000887255
Bbs2	705.744	0.632698	0.140708	4.49652	6.91e-06	0.00089222
Adgrf5	11037.1	0.504185	0.112551	4.47962	7.48e-06	0.000957002
Trappc6a	620.52	0.677385	0.152004	4.45636	8.34e-06	0.00105722
Igf1r	1102.73	0.530742	0.119403	4.44496	8.79e-06	0.00110479
Hpcal1	607.813	0.60377	0.135914	4.44229	8.9e-06	0.00110859
Krt222	1112.51	-0.753069	0.169968	-4.43066	9.39e-06	0.00115976
Rel	565.351	-0.659464	0.149177	-4.42067	9.84e-06	0.00120406
Frmd5	7566.64	-0.511898	0.115979	-4.41373	1.02e-05	0.00123048
Inpp5j	1526.64	-0.541692	0.122771	-4.41221	1.02e-05	0.00123048
Pnpla7	1280.23	0.637126	0.144601	4.4061	1.05e-05	0.00124793
Whamm	706.918	0.555701	0.126192	4.40363	1.06e-05	0.00124793
Dnase2a	430.103	0.639193	0.145105	4.40505	1.06e-05	0.00124793
Slc26a10	1594.92	0.616404	0.140163	4.39775	1.09e-05	0.0012715
Igsf23	234.184	0.859729	0.195832	4.39015	1.13e-05	0.00130593
Txnip	20696.7	1.38714	0.316591	4.38148	1.18e-05	0.00130729
Inka2	1229.41	-0.517163	0.117893	-4.3867	1.15e-05	0.00130729
Dnajc11	3273.06	-0.402796	0.0919299	-4.38156	1.18e-05	0.00130729
Gabarapl1	4275.2	0.629883	0.143718	4.38277	1.17e-05	0.00130729
Emp1	2748.25	-0.574125	0.131046	-4.38111	1.18e-05	0.00130729
Micall1	2884.8	-0.440859	0.100827	-4.37241	1.23e-05	0.00134979
Spryd4	1135.8	-0.57205	0.130939	-4.36882	1.25e-05	0.0013614
Gpcpd1	11486.3	0.402316	0.0921457	4.36608	1.26e-05	0.0013679
Mavs	3470.84	-0.46771	0.107254	-4.36075	1.3e-05	0.00138026
Amot	584.948	-0.639837	0.146702	-4.36146	1.29e-05	0.00138026
Ppfibp2	1858.19	0.45416	0.104285	4.35498	1.33e-05	0.00139585
Klhl38	665.579	0.662462	0.152097	4.35551	1.33e-05	0.00139585
Flvcr2	302.031	0.799022	0.183676	4.35017	1.36e-05	0.00141617
Cirbp	2679.04	0.738519	0.170172	4.33983	1.43e-05	0.00147346
Art4	973.049	0.594228	0.137021	4.33676	1.45e-05	0.00148319
Sox18	1847.25	0.580659	0.134203	4.32671	1.51e-05	0.00152997
Gck	968.121	-0.83277	0.192423	-4.32782	1.51e-05	0.00152997
Aqp7	624.385	0.584139	0.135178	4.32125	1.55e-05	0.00155706
Cep68	2805.73	-0.330909	0.0766447	-4.31745	1.58e-05	0.00157281
Slc2a12	493.303	0.614624	0.142569	4.31107	1.62e-05	0.00160738
Dstn	6945.02	-0.376521	0.0875933	-4.29851	1.72e-05	0.00168922
Gstm2	4239.82	0.534962	0.124642	4.29198	1.77e-05	0.00172753
Pfas	787.465	0.469802	0.10956	4.28809	1.8e-05	0.00174585
Gramd1b	2100.58	0.439527	0.102671	4.28094	1.86e-05	0.00177937
Hbp1	2156.09	0.36676	0.0856757	4.28079	1.86e-05	0.00177937
Plpp7	1438.35	-0.574598	0.134355	-4.2767	1.9e-05	0.00178708
Spon2	450.34	-1.17662	0.275154	-4.27622	1.9e-05	0.00178708
Dusp8	1735.13	-0.597619	0.139881	-4.27233	1.93e-05	0.00178708
Tcta	2468.88	0.362176	0.0847557	4.27317	1.93e-05	0.00178708
H2.Q4	1640.99	0.486012	0.113731	4.27335	1.93e-05	0.00178708
Fam160a1	2369.67	-0.594303	0.139172	-4.27028	1.95e-05	0.00179172
St3gal5	2572.31	-0.349272	0.0818729	-4.26602	1.99e-05	0.0018143
Pdss1	739.889	-0.612137	0.143773	-4.25766	2.07e-05	0.00183549
Bcl9	1437.95	0.405333	0.0951771	4.25873	2.06e-05	0.00183549
Acad12	5394.95	0.360652	0.0846641	4.25981	2.05e-05	0.00183549
Acta1	19196.8	-2.11771	0.497349	-4.25799	2.06e-05	0.00183549
Rwdd4a	1806.98	-0.484023	0.114038	-4.24441	2.19e-05	0.00193506
Galnt15	2246.22	0.569658	0.134356	4.2399	2.24e-05	0.00196195
Qrsl1	1491.21	-0.494004	0.117102	-4.21857	2.46e-05	0.00214356
A530016L24Rik	2020.36	0.464309	0.110147	4.21536	2.49e-05	0.00216081
Srf	5027.68	-0.323639	0.0768612	-4.2107	2.55e-05	0.00219223
Cyfip2	7879.3	-0.593916	0.141295	-4.20337	2.63e-05	0.0022506
Pim3	5444.5	0.836876	0.199366	4.19768	2.7e-05	0.00229378
Nacc1	2292.92	-0.507536	0.121045	-4.19294	2.75e-05	0.00232803
Arl2bp	3424.07	-0.33045	0.0789808	-4.18393	2.87e-05	0.00239675
Lgals1	4696.4	-0.321752	0.0769078	-4.1836	2.87e-05	0.00239675
Alox5	736.875	-0.748439	0.17915	-4.17772	2.94e-05	0.00241621
X2610035D17Rik	288.241	1.06569	0.255075	4.17797	2.94e-05	0.00241621
Gm9522	55.1942	1.92061	0.459631	4.17858	2.93e-05	0.00241621
Lyrm7	887.913	-0.593804	0.142212	-4.17548	2.97e-05	0.00242585
Calcoco1	7061.75	0.41733	0.100073	4.17025	3.04e-05	0.00246773
Crebrf	2130.04	0.447854	0.107568	4.16344	3.13e-05	0.00252789
Ubald2	1011.54	0.496564	0.119332	4.16119	3.17e-05	0.00253824
X2610005L07Rik	261.788	0.678015	0.16319	4.15477	3.26e-05	0.00259563
Man2a1	1515.7	0.404091	0.0973071	4.15273	3.29e-05	0.00260395
Pmepa1	1468.2	-0.419472	0.101052	-4.15103	3.31e-05	0.00260858
Fbxl22	3702.9	-0.587304	0.141733	-4.14373	3.42e-05	0.00267795
Rilp	2024.04	0.383936	0.0927022	4.1416	3.45e-05	0.00268784
Phyhip	1318.27	-0.547416	0.132344	-4.13631	3.53e-05	0.00273521
Cdkn1b	2432.36	0.420462	0.101791	4.13062	3.62e-05	0.00278831
Ypel2	1037.65	-0.515208	0.124914	-4.1245	3.72e-05	0.00284779
Srsf5	11643.6	0.474316	0.115062	4.12227	3.75e-05	0.00285977
Manf	1034.98	-0.56906	0.138125	-4.1199	3.79e-05	0.00287367
Slc7a1	2548.92	0.526955	0.12801	4.11651	3.85e-05	0.00290052
Sh3bp5	2780.47	0.301341	0.0732683	4.11284	3.91e-05	0.0029312
Gm36827	1840.35	0.668703	0.162945	4.10385	4.06e-05	0.00303117
Phospho2	1217.92	-0.374857	0.0913901	-4.10172	4.1e-05	0.00304298
Vasp	1613.51	-0.450329	0.109939	-4.09616	4.2e-05	0.00309783
Wdr82	2204.45	-0.34264	0.08367	-4.09513	4.22e-05	0.00309783
Adh1	525.986	1.17393	0.287461	4.08379	4.43e-05	0.00320249
Ntn1	5525.29	0.54804	0.134126	4.086	4.39e-05	0.00320249
Fas	684.74	0.567996	0.13905	4.08484	4.41e-05	0.00320249
Ramp2	1232.35	0.439592	0.107819	4.07712	4.56e-05	0.00327873
Hspa5	20890.9	-0.398244	0.0977738	-4.07311	4.64e-05	0.00330284
Bex1	73.0413	1.39221	0.341811	4.07303	4.64e-05	0.00330284
Mgat3	368.53	-0.647011	0.158915	-4.07143	4.67e-05	0.00330871
Selenbp2	79.1931	2.14521	0.528025	4.06271	4.85e-05	0.00341745
Gm14403	445.58	-0.67212	0.165537	-4.06024	4.9e-05	0.00342848
Frmd6	2493.83	-0.375474	0.09249	-4.05961	4.92e-05	0.00342848
Desi2	1250.14	-0.481762	0.118795	-4.05542	5e-05	0.00347324
Lrrc20	2313	-0.354747	0.0877001	-4.045	5.23e-05	0.00361336
Ndufaf4	3451.65	-0.467148	0.115539	-4.04319	5.27e-05	0.00362344
Wwp1	4397.48	-0.320178	0.0792209	-4.04159	5.31e-05	0.00363049
Abtb1	1320.08	0.564257	0.139895	4.03343	5.5e-05	0.0037149
Ezh1	2431.5	0.480819	0.11918	4.03439	5.47e-05	0.0037149
Gm14964	109.843	1.39018	0.34472	4.03277	5.51e-05	0.0037149
Miga2	4041.73	-0.323806	0.0803637	-4.02926	5.6e-05	0.00375267
Tmprss13	126.256	-1.47558	0.366739	-4.02351	5.73e-05	0.003827
Per2	433.996	1.18929	0.295975	4.01822	5.86e-05	0.00385857
Atxn2	3106.96	-0.429682	0.106875	-4.02043	5.81e-05	0.00385857
Arhgap18	1226.78	-0.505934	0.125889	-4.0189	5.85e-05	0.00385857
Abca4	343.611	0.937697	0.233678	4.01277	6e-05	0.00393026
Errfi1	1215.27	-0.578162	0.144375	-4.00458	6.21e-05	0.00404993
Mboat2	501.473	0.503935	0.126112	3.99593	6.44e-05	0.00418111
Ppp1r10	1352.19	-0.582012	0.145992	-3.9866	6.7e-05	0.0043289
Cebpb	1833.27	0.644667	0.161944	3.98079	6.87e-05	0.00437517
Cpxm2	1171.63	-0.454613	0.114158	-3.98232	6.82e-05	0.00437517
Lims2	2761.43	0.402956	0.101206	3.98155	6.85e-05	0.00437517
Zfp397	1543.99	-0.433048	0.108998	-3.97299	7.1e-05	0.00450056
Ythdf3	3686.4	-0.289945	0.0730619	-3.96848	7.23e-05	0.00456572
Cfl1	5195.16	-0.308313	0.0778301	-3.96136	7.45e-05	0.00468299
Kcnip2	10350.5	0.46507	0.117686	3.95179	7.76e-05	0.00485244
Khnyn	1010.02	0.388146	0.0985752	3.93756	8.23e-05	0.00512636
Cnppd1	1365.22	0.426118	0.108505	3.92717	8.6e-05	0.00532892
Mical1	585.129	0.458309	0.116742	3.92583	8.64e-05	0.00533498
Sesn1	7127.52	0.536677	0.137033	3.9164	8.99e-05	0.00552347
Pfkp	3172.57	-0.321221	0.0821603	-3.90968	9.24e-05	0.00565444
Twf2	8994.7	0.526244	0.135009	3.89785	9.71e-05	0.00588629
Klhl24	13373.5	0.423441	0.10861	3.89875	9.67e-05	0.00588629
Psme4	14483.6	-0.459774	0.118038	-3.89515	9.81e-05	0.00592654
Ap1b1	3726.73	-0.34598	0.0888984	-3.89186	9.95e-05	0.00598162
Pik3r3	562.303	-0.525863	0.135234	-3.88855	0.000100845	0.00599174
X2410131K14Rik	1190.29	-0.415393	0.106829	-3.8884	0.000100909	0.00599174
Clip1	11743.3	0.394786	0.101558	3.8873	0.000101366	0.00599174
Cyp1b1	562.037	0.657915	0.169229	3.88771	0.000101193	0.00599174
Synj2	3770.39	0.49457	0.127742	3.87162	0.000108114	0.0063637
Csf1	2577.55	-0.43659	0.1129	-3.86704	0.000110164	0.00643005
Opa3	4536.07	-0.367567	0.0950289	-3.86795	0.000109753	0.00643005
Tuba1a	2106.14	-0.4589	0.118825	-3.862	0.000112464	0.00649957
Slc22a3	515.625	-0.62324	0.161369	-3.8622	0.00011237	0.00649957
Brd2	4618.07	0.297832	0.077131	3.86137	0.000112752	0.00649957
Pcsk4	160.048	0.885805	0.230053	3.85043	0.000117909	0.00676882
Gm12286	126.674	-1.10725	0.287765	-3.84777	0.000119199	0.00681484
Hyou1	2036.12	-0.392313	0.101993	-3.84649	0.000119824	0.00682264
Xab2	1135.81	0.370941	0.0969126	3.82759	0.000129406	0.00732468
Tbc1d10c	419.926	0.549198	0.143504	3.82704	0.000129691	0.00732468
Xrn2	1901.29	0.340199	0.0891309	3.81685	0.000135166	0.00755264
Gapdh	127223	-0.261251	0.068481	-3.81494	0.000136215	0.00755264
Mrs2	2587.57	-0.527829	0.138334	-3.81561	0.000135849	0.00755264
Cpt1b	437.632	0.510641	0.13377	3.8173	0.000134922	0.00755264
Mrps34	2360.13	-0.376465	0.098692	-3.81454	0.000136435	0.00755264
Bak1	805.803	-0.519865	0.136359	-3.81248	0.00013758	0.00758593
Dnaja1	3130.94	-0.537067	0.141065	-3.80722	0.000140535	0.00771836
Gm14327	367.592	-0.832119	0.218646	-3.80577	0.000141362	0.00773336
Car4	746.284	0.822672	0.216222	3.80477	0.000141939	0.00773455
Ano10	2954.92	0.469461	0.123539	3.80009	0.000144644	0.00782088
Igfals	212.132	-0.955933	0.251516	-3.80068	0.000144301	0.00782088
Nfil3	559.853	-0.558468	0.147069	-3.79732	0.000146268	0.00787815
Foxk2	1362.66	-0.378971	0.100149	-3.78408	0.00015428	0.00827771
Rftn1	2009.25	0.451794	0.119462	3.78192	0.000155625	0.0083179
Bpnt1	759.283	-0.504933	0.133575	-3.78013	0.000156746	0.00834583
Calm1	9743.15	-0.331898	0.0878509	-3.77798	0.000158108	0.00838636
Prkab2	2793.63	-0.369377	0.0978139	-3.77632	0.00015916	0.00841016
Gm13943	174.07	-0.89764	0.238543	-3.76301	0.000167882	0.00880434
Cdk16	7752.39	-0.243283	0.0646483	-3.76317	0.000167771	0.00880434
Tecr	18118.5	-0.369807	0.0983227	-3.76116	0.00016913	0.00883655
Peg13	2980.96	0.279553	0.0743953	3.75767	0.000171504	0.00892716
Ypel3	2354.87	0.625205	0.166659	3.7514	0.000175848	0.00911923
Myh7	15448.4	0.64791	0.173744	3.72911	0.000192156	0.00992804
Sik1	1406.79	-0.692085	0.185968	-3.72152	0.000198025	0.0101935
Angptl4	582.439	2.36667	0.636578	3.7178	0.000200964	0.0103068
Prelid3b	2791.27	-0.382008	0.102788	-3.71648	0.000202021	0.0103231
Ccdc85a	664.704	0.613684	0.165438	3.70946	0.000207705	0.0105363
Nr3c1	4287.21	-0.306308	0.0825743	-3.70948	0.000207686	0.0105363
Tuba4a	33594.9	-0.713987	0.192533	-3.70839	0.000208579	0.0105399
Aen	1492.1	-0.365336	0.0985726	-3.70626	0.000210342	0.0105399
Pnpla2	17188.7	0.562271	0.151699	3.70649	0.000210153	0.0105399
Lpin1	9758.45	-0.409691	0.110557	-3.70571	0.000210798	0.0105399
Fam111a	285.179	-0.632626	0.170797	-3.70397	0.000212248	0.0105745
Smarcd3	2333.97	-0.288657	0.0779698	-3.70217	0.000213767	0.0106123
Scoc	1244.6	-0.477063	0.129043	-3.69692	0.000218228	0.0106504
Lrtm1	22035	-0.55434	0.149919	-3.6976	0.000217645	0.0106504
Ccng1	37475.8	-0.565738	0.152987	-3.69796	0.000217342	0.0106504
Mrpl55	2873.15	-0.4062	0.109879	-3.69678	0.000218353	0.0106504
Nrde2	690.423	0.439653	0.118816	3.70029	0.000215352	0.0106504
Tmx2	3895.34	-0.506812	0.137295	-3.69142	0.000223006	0.0108395
Fgf2	917.552	0.387187	0.105286	3.6775	0.000235536	0.0113693
Cdkl1	519.957	0.768331	0.208894	3.67809	0.000234985	0.0113693
Spsb3	465.623	-0.645977	0.175716	-3.67625	0.000236685	0.0113854
Itgb1bp2	7007.29	-0.349611	0.0951457	-3.67448	0.000238331	0.0113887
Gm40604	72.3576	1.13351	0.308486	3.67442	0.000238387	0.0113887
Clock	2610.73	-0.349165	0.095083	-3.67222	0.000240456	0.0114483
Fzr1	1987.15	-0.307792	0.0839622	-3.66584	0.000246531	0.0116976
Ifi207	612.606	0.443993	0.121153	3.66473	0.000247601	0.0117086
Mfap3l	764.493	-0.596366	0.162894	-3.66106	0.000251173	0.0118374
Arhgap20	1711.62	0.440068	0.120284	3.65857	0.00025363	0.0119129
X1810034E14Rik	442.518	-0.543554	0.148674	-3.65602	0.000256158	0.0119913
Gm1821	1676.16	0.477337	0.130649	3.65358	0.000258607	0.0120654
Corin	10261.1	0.484225	0.132628	3.651	0.000261222	0.0121468
Hsd17b11	1621.79	0.379044	0.103964	3.64593	0.000266431	0.0123479
Fastkd2	1365.22	-0.403242	0.110767	-3.64047	0.000272145	0.0125675
Tk2	579.915	0.478436	0.13145	3.63969	0.000272971	0.0125675
Pde11a	44.7049	-1.75265	0.482263	-3.63423	0.000278813	0.0127417
Serpina3n	669.904	0.588699	0.161942	3.63524	0.000277725	0.0127417
Rcan1	4508.56	-0.438257	0.120612	-3.6336	0.000279495	0.0127417
Nup62	1257.06	-0.358692	0.0989101	-3.62644	0.000287351	0.0130571
Sema3b	2224.3	0.425091	0.117254	3.6254	0.000288518	0.0130676
Plscr2	1302.1	0.4393	0.121212	3.62422	0.000289838	0.0130849
Slc30a1	874.418	0.523845	0.144837	3.61679	0.000298274	0.0133856
Dact3	967.009	-0.584222	0.161536	-3.61667	0.000298417	0.0133856
Cbx7	1605.41	0.63022	0.174337	3.61496	0.000300388	0.0134308
Myh1	1096.07	-10.9397	3.03156	-3.60862	0.000307828	0.0137195
Cilp	1019.87	-0.401632	0.1114	-3.60533	0.000311761	0.0138505
Timm8a1	307.956	-0.666755	0.185396	-3.59639	0.000322663	0.0142625
Cep128	651.599	0.592258	0.164697	3.59606	0.000323079	0.0142625
Ankrd63	183.965	0.835522	0.232461	3.59425	0.00032533	0.0143166
Gm15626	90.2121	1.15737	0.322183	3.59226	0.000327826	0.0143398
Hist1h2al	52.6878	6.26817	1.74495	3.59219	0.000327914	0.0143398
Spsb4	349.601	-0.868032	0.241794	-3.58996	0.000330724	0.0144175
Id3	2029.51	0.348048	0.0970944	3.58463	0.000337552	0.0146693
Daam1	4354.18	-0.323287	0.0902826	-3.58083	0.000342501	0.0148382
Nos1	50.3016	-3.30383	0.924504	-3.57362	0.000352075	0.0151588
Serpinh1	9472.42	-0.65293	0.182701	-3.57377	0.000351884	0.0151588
Casc1	306.248	-0.57829	0.161864	-3.57269	0.000353335	0.0151662
Tcf23	124.715	1.17588	0.32975	3.56598	0.000362495	0.0155117
Gramd3	915.87	-0.373796	0.104872	-3.56433	0.000364791	0.0155622
Zc3h6	386.937	0.85248	0.23929	3.56253	0.000367293	0.0156211
Malat1	42856	0.359025	0.100865	3.55946	0.000371616	0.015757
Rgs17	95.1209	1.17931	0.331636	3.55605	0.000376476	0.0159147
Ttll7	449.836	0.553433	0.155807	3.55205	0.000382248	0.016085
Tmem150c	423.66	-0.635602	0.178999	-3.55087	0.000383964	0.016085
Pde12	641.244	-0.464378	0.130761	-3.55136	0.000383244	0.016085
Tomm70a	3965.04	-0.337488	0.095104	-3.54863	0.000387248	0.016174
Phf20	1181.26	0.326003	0.0919205	3.54657	0.000390278	0.0162519
Tuba1b	4260.02	-0.404713	0.114145	-3.54562	0.000391692	0.0162622
Magt1	2070.65	-0.455237	0.128467	-3.54361	0.000394692	0.0163382
Pde3a	4267.42	0.320578	0.0905505	3.54033	0.000399631	0.0164618
H2.T24	480.575	0.478878	0.135274	3.54006	0.000400039	0.0164618
Dhx34	614.732	0.430938	0.121821	3.53746	0.00040399	0.0165755
Kank3	2405.15	0.542277	0.153476	3.5333	0.000410399	0.016789
Sh3kbp1	6021.65	-0.458162	0.129699	-3.53249	0.000411663	0.0167915
Adamtsl4	2376.67	0.365809	0.103614	3.53048	0.000414804	0.0168703
Hif3a	152.621	2.85407	0.808946	3.52814	0.000418498	0.0169219
Cdr2	403.94	-0.504678	0.143034	-3.52838	0.000418105	0.0169219
Stard13	1367.2	0.401227	0.11386	3.52387	0.000425297	0.0170486
Wfikkn2	484.37	0.608745	0.172677	3.52534	0.000422944	0.0170486
Thbs2	1373.1	0.466853	0.13248	3.52395	0.000425171	0.0170486
Fam110b	396.397	-0.528592	0.150253	-3.51801	0.000434797	0.0172804
Grip2	1468.32	-0.586038	0.166576	-3.51813	0.000434591	0.0172804
Pdp2	1586.81	0.483558	0.137438	3.51838	0.000434189	0.0172804
Irx3	1990.19	0.483973	0.137703	3.51461	0.000440408	0.0174537
Mgat5	936.896	-0.483942	0.137787	-3.51223	0.000444357	0.0175107
Bmp10	7205.8	-0.510972	0.145468	-3.5126	0.000443752	0.0175107
Pdia3	6360.37	-0.271463	0.0773666	-3.50879	0.000450154	0.0176892
Tenm3	249.142	0.637306	0.181814	3.50527	0.000456151	0.0178744
Ndufa11	6304.65	-0.252096	0.0720672	-3.49807	0.00046864	0.0183124
Pld1	565.83	0.466967	0.133559	3.49633	0.000471705	0.0183807
Shld1	829.504	0.81318	0.232757	3.49368	0.000476408	0.0184608
Slc15a2	264.829	1.09966	0.314732	3.49397	0.000475902	0.0184608
Gigyf1	2661.9	0.304689	0.0872447	3.49234	0.000478802	0.0185022
Ccdc9	1470.01	0.455513	0.130566	3.48877	0.000485249	0.0186995
Pkd2l2	761.895	-0.454622	0.130377	-3.48698	0.000488505	0.0187731
Dixdc1	626.258	0.563536	0.161665	3.48582	0.000490624	0.0188028
Mertk	554.533	0.471699	0.135399	3.48377	0.0004944	0.0188478
Cx3cr1	201.891	-0.9745	0.27973	-3.48372	0.000494502	0.0188478
Mocs1	831.49	0.504978	0.145058	3.48122	0.00049913	0.0189724
Mrm3	919.611	-0.465737	0.133934	-3.47736	0.00050637	0.0191953
Sox7	641.964	0.492507	0.141802	3.47321	0.000514277	0.0193896
Gjc1	906.567	0.355837	0.10245	3.47327	0.00051416	0.0193896
Armc1	2496.63	-0.423571	0.12202	-3.47132	0.000517903	0.0194737
Egfl7	3273	0.319483	0.0921763	3.466	0.000528273	0.0195995
Rnft2	203.245	-0.776183	0.223842	-3.46756	0.000525215	0.0195995
Tmem106b	7338.37	0.219658	0.0633709	3.46622	0.000527828	0.0195995
Smim13	1796.35	-0.35245	0.101663	-3.46686	0.000526583	0.0195995
Hagh	2094.53	-0.415638	0.119912	-3.46619	0.000527891	0.0195995
Fam53b	1583.14	-0.463499	0.133805	-3.46399	0.000532236	0.0196941
Abcb9	793.812	-0.439617	0.127133	-3.45793	0.000544337	0.0200886
Zmpste24	2102.91	-0.379253	0.109784	-3.45453	0.000551255	0.0202902
Zfp672	1642.28	-0.356214	0.103184	-3.45224	0.000555958	0.0204095
Pank1	2910.32	0.357995	0.103917	3.44501	0.000571048	0.0209085
Rap1gap2	5392.92	-0.406	0.11796	-3.44184	0.000577774	0.0210993
Isyna1	1341.4	0.506122	0.147335	3.43519	0.000592146	0.021522
Ip6k1	2698.22	0.341715	0.0994789	3.43505	0.000592434	0.021522
Nup50	882.768	-0.362907	0.105859	-3.4282	0.000607595	0.0220155
Scara5	1723.18	0.375754	0.109672	3.42617	0.000612162	0.0221235
Myh4	240.617	-11.1759	3.26287	-3.42519	0.00061438	0.0221463
Dpep1	3052.33	0.495225	0.144645	3.42373	0.00061768	0.0221792
Fstl4	166.759	1.14482	0.334413	3.42338	0.000618473	0.0221792
Abcg2	1236.51	0.363919	0.106327	3.42264	0.000620161	0.0221827
Aldh2	16025	0.372426	0.108864	3.42102	0.000623857	0.0222333
Acox1	14996.4	0.291148	0.0851152	3.42063	0.000624763	0.0222333
Map7	1220.68	0.416913	0.121912	3.41979	0.000626696	0.0222453
Lor	2078.22	-6.92885	2.02659	-3.41897	0.000628587	0.0222558
Peli2	816.801	0.495616	0.145157	3.41435	0.000639353	0.0225797
Pik3r1	6448.24	0.648772	0.19015	3.4119	0.000645126	0.022726
Zbed4	229.575	-0.610287	0.179001	-3.40941	0.000651025	0.0228761
Bag2	1711.04	-0.302983	0.0890107	-3.40389	0.000664334	0.0230263
Foxo4	2977.52	0.3399	0.0998379	3.40452	0.000662816	0.0230263
Nub1	1603.63	0.420201	0.12346	3.40353	0.000665203	0.0230263
Krt78	120.413	-6.14979	1.80581	-3.40557	0.000660266	0.0230263
Sh3rf2	1300.63	0.39317	0.115451	3.40552	0.000660387	0.0230263
Ablim3	2596.99	0.477683	0.140227	3.40651	0.000657993	0.0230263
Pirt	596.532	0.479238	0.140836	3.40281	0.000666965	0.0230301
Wfdc1	812.945	-0.594374	0.174776	-3.40078	0.000671943	0.0231182
Cltc	7909.88	-0.265851	0.0781972	-3.39974	0.000674488	0.0231182
Ahrr	260.293	0.733826	0.215813	3.40028	0.000673168	0.0231182
Adamts1	1799.86	-0.538785	0.158695	-3.39509	0.000686054	0.023457
Ptcd3	6178.56	-0.270102	0.0796273	-3.39208	0.000693631	0.0236147
Tead1	7052.86	-0.339511	0.100094	-3.39192	0.000694052	0.0236147
Oxnad1	2847.54	-0.394734	0.11641	-3.3909	0.000696634	0.0236354
Plet1os	430.319	0.523712	0.154472	3.39034	0.00069805	0.0236354
Nr4a3	159.199	-1.19326	0.35243	-3.3858	0.000709705	0.0239719
Grpel2	937.807	-0.34785	0.102789	-3.38412	0.000714076	0.0240495
Gm6445	46.1238	1.3651	0.403448	3.38359	0.00071545	0.0240495
Sacs	2091.38	-0.558441	0.16508	-3.38284	0.000717397	0.0240569
Arf2	1212.1	-0.332989	0.0987313	-3.37268	0.000744417	0.0249032
Adh6b	45.1255	1.27457	0.377986	3.37199	0.000746262	0.0249051
Tagln2	2473	-0.408098	0.121085	-3.37034	0.00075075	0.0249951
Btnl9	3158.88	0.666277	0.197779	3.3688	0.000754965	0.0250202
Sqstm1	19001.4	0.476763	0.141525	3.36875	0.000755091	0.0250202
Slc35a4	2298.83	-0.348588	0.103513	-3.36759	0.000758273	0.0250661
Larp4b	3630.83	-0.342502	0.101749	-3.36614	0.000762293	0.0251395
Rab11fip3	2236.44	-0.274327	0.0815246	-3.36496	0.000765554	0.0251874
Irx4	1979.07	-0.362163	0.107667	-3.36372	0.000769004	0.0252342
Tfap4	133.921	0.983249	0.29236	3.36315	0.000770591	0.0252342
Dbp	1940.49	0.694329	0.206616	3.36048	0.00077807	0.0253621
Abce1	3014.13	-0.294722	0.0877029	-3.36046	0.000778133	0.0253621
Zdhhc7	2043.03	-0.276735	0.0824497	-3.35641	0.000789604	0.0256759
Zfp970	1607.85	-0.560765	0.167123	-3.35539	0.000792525	0.025711
Clec16a	2901.28	-0.410006	0.122237	-3.3542	0.000795948	0.0257621
Txndc11	854.516	-0.376048	0.112188	-3.35195	0.000802437	0.025912
Spaar	307.803	0.716076	0.213891	3.34785	0.000814408	0.0262378
Acvr1	700.496	-0.37778	0.112896	-3.34627	0.000819078	0.026267
Evc2	523.046	0.420327	0.125605	3.34641	0.000818653	0.026267
Aldh9a1	2093.51	0.429218	0.128477	3.34082	0.000835315	0.0267263
Ppm1e	694.408	0.45455	0.136095	3.33994	0.000837958	0.0267272
Gm17251	110.924	0.869362	0.260324	3.33954	0.000839175	0.0267272
E130102H24Rik	179.779	0.749297	0.22455	3.33689	0.000847226	0.0269221
Neurl3	332.547	-0.499962	0.150117	-3.33048	0.000866979	0.027442
Abtb2	1728.75	-0.354305	0.106408	-3.32967	0.000869487	0.027442
Mrpl12	4673.33	-0.348875	0.104769	-3.32995	0.0008686	0.027442
Kpna1	5497.19	-0.321854	0.0967226	-3.3276	0.000875962	0.0275839
Tinagl1	2338.25	0.343357	0.103369	3.32166	0.000894833	0.0279417
Ddo	2432.39	-0.345652	0.104065	-3.3215	0.000895338	0.0279417
Pcnt	3912.66	0.356737	0.107349	3.32314	0.000890115	0.0279417
Mum1	1102.33	0.367905	0.110738	3.3223	0.000892782	0.0279417
Chd3	1838.68	0.279438	0.084157	3.32043	0.000898784	0.0279867
Kpna6	3442.48	-0.334254	0.100727	-3.31841	0.000905314	0.0281078
Gstt2	408.497	0.668148	0.201372	3.31798	0.000906703	0.0281078
Flna	6982.64	-0.261288	0.0787783	-3.31675	0.000910727	0.0281699
Ube2f	1707.27	-0.373408	0.112632	-3.3153	0.000915438	0.0281906
Rasgrp3	1691.52	-0.348191	0.105023	-3.31538	0.000915175	0.0281906
Cse1l	2747.68	-0.307171	0.092675	-3.31449	0.00091809	0.02821
Retreg1	12319.8	0.589378	0.17811	3.30907	0.000936062	0.028699
Fmo2	2221.52	0.634191	0.191853	3.30561	0.000947701	0.0289287
C920006O11Rik	123.984	0.883759	0.267345	3.30568	0.000947446	0.0289287
Art1	7879.71	0.308933	0.093507	3.30385	0.000953672	0.0290474
Pcmtd2	3466.12	0.272437	0.0825134	3.30173	0.000960903	0.0290772
Spata13	888.977	-0.379844	0.115039	-3.30186	0.000960464	0.0290772
Ckb	2914.38	-0.312998	0.0947705	-3.30269	0.000957618	0.0290772
Zrsr1	1133.34	0.510418	0.154722	3.29894	0.000970496	0.0292406
Pgam1	1582.69	-0.465178	0.140991	-3.29934	0.000969123	0.0292406
Sprr1a	116.872	-5.877	1.78213	-3.29774	0.000974655	0.0293027
Inpp4b	2407.91	-0.286832	0.0870623	-3.29456	0.000985757	0.0295727
Tfpi	3903.1	0.449471	0.136509	3.29261	0.000992637	0.0297152
Calr3	706.475	0.757047	0.23012	3.28979	0.00100263	0.02995
Gclm	1325.45	0.486951	0.148175	3.28631	0.00101508	0.0301949
Mob1b	1291.47	-0.317169	0.0965824	-3.28393	0.00102372	0.0301949
Eid2	413.696	0.477685	0.145365	3.28611	0.00101583	0.0301949
Gadd45b	421.307	0.633389	0.192773	3.28567	0.00101738	0.0301949
Ubxn8	625.819	0.430481	0.131068	3.2844	0.00102199	0.0301949
Gm10435	1713.7	-0.541549	0.16491	-3.2839	0.00102381	0.0301949
Atoh8	418.459	0.594652	0.181204	3.28167	0.00103196	0.0303708
Polr2a	2444.45	0.299525	0.0914869	3.27396	0.00106051	0.03108
Memo1	2058.91	-0.373738	0.114139	-3.2744	0.00105886	0.03108
Slc27a4	1324.15	-0.338726	0.103488	-3.27308	0.00106383	0.0311121
Stk40	3340.75	-0.325778	0.0997562	-3.26574	0.00109177	0.0318624
Tmod4	770.911	-0.490273	0.150219	-3.26372	0.00109961	0.0320243
Elavl1	1258.38	-0.362434	0.111169	-3.2602	0.00111332	0.0322998
Plcd3	966.179	0.646135	0.198194	3.26011	0.00111371	0.0322998
Arhgap29	4369.49	-0.309833	0.0950948	-3.25815	0.00112142	0.032456
Grb14	9068.72	-0.274029	0.0841691	-3.2557	0.00113114	0.0326696
Tspan4	1047.17	0.54277	0.166744	3.25511	0.00113349	0.0326699
Ccdc69	442.387	-0.672452	0.206659	-3.25392	0.00113826	0.0327397
Jak1	8429.99	0.309881	0.0953181	3.25101	0.00114994	0.0330075
Cnnm3	864.104	0.437182	0.134585	3.24836	0.00116071	0.0332034
Fbxl3	3455.47	0.356573	0.109777	3.24816	0.00116152	0.0332034
Dhtkd1	286.237	0.680967	0.209867	3.24475	0.00117552	0.0335349
C130080G10Rik	2674.03	-0.587612	0.181261	-3.24179	0.00118779	0.0338158
Cxcl9	187.817	-0.696026	0.214787	-3.24054	0.00119301	0.0338952
Sgo2a	215.787	0.632944	0.195452	3.23835	0.00120222	0.0340181
Arhgap35	3610.52	-0.280788	0.0866939	-3.23885	0.00120014	0.0340181
Klf9	5867.28	0.409339	0.126534	3.23501	0.00121638	0.0343491
Cyb5b	3528.08	-0.29814	0.092239	-3.23226	0.00122815	0.0346115
Jade2	1063.93	0.546573	0.169205	3.23024	0.00123685	0.0347863
Homer2	3343.6	-0.386903	0.119921	-3.2263	0.00125401	0.035198
Fgfr1op	921.423	-0.358014	0.111038	-3.22425	0.00126303	0.0353801
Naa60	1483.8	-0.33346	0.103469	-3.22279	0.00126949	0.0354897
Srsf3	4693.19	-0.425944	0.132446	-3.21598	0.00130002	0.0362705
Luzp1	2323.52	-0.284867	0.0887595	-3.20943	0.00133	0.0369591
Rbl2	2309.89	0.301125	0.0938206	3.20959	0.00132925	0.0369591
Pde4b	1619.31	-0.419621	0.130865	-3.20653	0.00134346	0.0370027
Relt	230.122	-0.714151	0.222738	-3.20624	0.00134483	0.0370027
Hebp2	69.7462	-1.9117	0.596126	-3.20687	0.00134187	0.0370027
Myh8	1707.65	-9.75494	3.04224	-3.2065	0.0013436	0.0370027
X2610507B11Rik	21438.2	-0.290496	0.0905902	-3.2067	0.00134266	0.0370027
Atg13	3137.28	0.341727	0.10673	3.20178	0.00136583	0.0372862
Prkaa2	6565.57	-0.334855	0.104559	-3.20254	0.00136221	0.0372862
Clstn1	3950.37	0.275675	0.0860907	3.20215	0.00136407	0.0372862
Nrbp2	1743.33	0.452775	0.14135	3.20323	0.00135896	0.0372862
Ucp3	3407.02	1.84602	0.576795	3.20047	0.00137203	0.0373825
Mpi	4496.93	-0.353417	0.110488	-3.19868	0.00138057	0.037396
Tmem71	526.134	0.508457	0.158921	3.19942	0.00137702	0.037396
Oard1	936.527	0.372054	0.116304	3.19897	0.00137918	0.037396
Adgrg1	2371.14	0.455119	0.142442	3.19511	0.00139777	0.0377887
Ptpru	310.558	0.590605	0.184912	3.19398	0.00140325	0.0377901
Gaa	8028.77	0.28671	0.0897648	3.19402	0.00140308	0.0377901
Ret	336.094	-0.730658	0.228843	-3.19283	0.00140885	0.0378679
Akap17b	216.097	-0.594224	0.186259	-3.19031	0.00142119	0.0381261
Nkiras1	1281.82	-0.432919	0.13576	-3.18884	0.00142843	0.0381736
Actg1	8408.62	-0.420467	0.131834	-3.18936	0.00142586	0.0381736
Myom2	52248.2	1.01717	0.319093	3.1877	0.00143409	0.0382514
Scin	262.305	0.80827	0.253613	3.18702	0.00143746	0.0382683
Tmem258	1708.76	-0.345347	0.108484	-3.1834	0.00145555	0.0386761
Sos2	2007.27	-0.276142	0.0868075	-3.18109	0.00146723	0.0389122
Usp10	2045.07	-0.285705	0.0899155	-3.17749	0.00148557	0.039324
Tfdp2	3448.92	0.491853	0.15492	3.17489	0.00149891	0.0396019
Serpinb6b	1787.17	0.583637	0.18388	3.17402	0.00150345	0.0396468
Afg1l	2475.44	-0.420888	0.132684	-3.1721	0.00151343	0.0398347
Anxa2	2817.1	-0.374983	0.118274	-3.17047	0.00152193	0.0399829
Mcam	2088.18	-0.304085	0.0959691	-3.16858	0.00153187	0.0401685
BB218582	609.234	0.532652	0.168279	3.16529	0.00154929	0.0404729
Itgb5	5583.05	0.346457	0.109452	3.16538	0.00154878	0.0404729
Kbtbd12	851.046	-0.443004	0.140093	-3.16222	0.00156569	0.0406731
Zfp61	153.142	0.815476	0.257854	3.16255	0.00156397	0.0406731
Cyb5r2	661.587	0.448339	0.141764	3.16257	0.00156383	0.0406731
Pkp2	7972.71	0.336019	0.106323	3.16037	0.0015757	0.040857
S100a16	1712.02	-0.509244	0.161283	-3.15745	0.00159154	0.0410388
Cry1	506.574	-0.449771	0.142428	-3.15788	0.00158921	0.0410388
Vapa	3282.69	-0.233807	0.0740491	-3.15746	0.00159152	0.0410388
Ptges2	2470.64	-0.302284	0.0957893	-3.15572	0.00160104	0.0412076
Rars2	1019.15	-0.357598	0.113417	-3.15294	0.00161636	0.0415252
Grk5	1828.75	0.394767	0.125311	3.15029	0.00163108	0.0418263
Olfml3	941.6	0.481592	0.152955	3.14858	0.00164064	0.0419943
Rnasel	402.148	0.636468	0.202578	3.14184	0.00167891	0.0427388
Mylip	1191.55	0.526511	0.167559	3.14223	0.00167664	0.0427388
Vldlr	17748.9	0.28586	0.0909575	3.14278	0.0016735	0.0427388
A1bg	7.831	-1.48584	0.35704	-3.4562	0.00526517	0.0430425
Ttc12	1494.28	0.505067	0.160938	3.13828	0.00169943	0.0431821
Slc39a10	625.149	-0.395491	0.126157	-3.13491	0.00171904	0.043527
Tmem25	707.578	-0.492309	0.157042	-3.13488	0.00171924	0.043527
Abca1	1791.52	0.32165	0.102653	3.13338	0.00172806	0.0436711
Casq1	399.917	-1.12574	0.359463	-3.13174	0.00173776	0.0437988
Ccrl2	636.302	0.416859	0.13312	3.13146	0.00173939	0.0437988
Spry4	426.597	-0.478621	0.152921	-3.12985	0.00174893	0.0439596
Tmem246	2449.79	-0.269639	0.0861993	-3.12808	0.00175949	0.0440663
Arhgef10	1322.07	0.336404	0.107539	3.12821	0.00175873	0.0440663
Impa1	871.278	-0.358421	0.114624	-3.12692	0.00176647	0.0440869
Zc3h4	1771.63	0.288938	0.0924196	3.12637	0.00176978	0.0440869
Gm36372	85.8988	-1.03384	0.330683	-3.12637	0.0017698	0.0440869
Mrpl19	1290.02	-0.551075	0.176492	-3.12237	0.001794	0.0446101
Neat1	43617.7	0.542877	0.173998	3.12002	0.0018084	0.0448883
Ubb	11503.6	0.328633	0.105467	3.11597	0.0018334	0.0454281
Adra1d	284.009	-0.529532	0.170087	-3.11331	0.00185003	0.0456067
Atp10d	378.249	0.473566	0.152113	3.11324	0.00185042	0.0456067
Mybpc1	191.269	-6.40708	2.05742	-3.11413	0.00184488	0.0456067
Asprv1	677.247	-7.42287	2.38628	-3.11064	0.0018668	0.0459291
Firre	2147.84	0.263847	0.0848808	3.10845	0.00188074	0.0461095
Lmna	4995.39	-0.238883	0.0768402	-3.10883	0.00187833	0.0461095
Apln	737.515	-0.828946	0.266837	-3.10656	0.00189277	0.046161
X9530026P05Rik	211.07	0.787352	0.253386	3.10732	0.00188793	0.046161
Mapkapk3	1552.52	-0.327844	0.10552	-3.10694	0.00189035	0.046161
Eef1e1	486.735	-0.457841	0.147438	-3.10531	0.00190077	0.0462754
Trip11	2919.6	-0.304772	0.0983023	-3.10036	0.00193288	0.046975
Tmem245	5076.03	0.25665	0.0828738	3.09687	0.00195573	0.0473654
Hmgcs1	1599.44	-0.320461	0.103468	-3.09719	0.00195363	0.0473654
Stk17b	637.462	-0.505982	0.163532	-3.09409	0.00197416	0.0477289
Idh2	82967.5	0.370763	0.11989	3.09252	0.00198468	0.0479001
Mylk2	48.7721	-2.99283	0.968186	-3.09117	0.0019937	0.0480347
Prdm1	170.274	-0.83485	0.270127	-3.09059	0.00199759	0.0480456
Mef2c	2786.16	-0.352085	0.11402	-3.08793	0.00201556	0.0483943
Cav3	2045.92	-0.363219	0.117703	-3.08589	0.00202946	0.0486444
Klhdc8a	1719.68	-0.732494	0.23749	-3.08432	0.00204019	0.0487759
Cic	2919.49	0.274261	0.0889286	3.08406	0.00204194	0.0487759
H2.T23	1670.36	0.542819	0.17612	3.08209	0.0020555	0.0490158
Patz1	1069.53	0.424093	0.137724	3.0793	0.00207487	0.0493401
Cstf2t	1467.54	-0.282683	0.0918065	-3.07911	0.00207617	0.0493401
Tmem268	873.348	-0.350875	0.114033	-3.07695	0.00209132	0.0495826
Slc20a2	10246	0.265366	0.0862519	3.07664	0.00209349	0.0495826
Nacc2	1725.1	-0.478399	0.155556	-3.07541	0.00210211	0.0496185
Kif1b	10220.9	-0.254151	0.0826358	-3.07555	0.00210112	0.0496185
X2510009E07Rik	1399.41	-0.331685	0.107889	-3.07431	0.00210987	0.0497175
H2.T22	1140.92	0.423074	0.137657	3.07338	0.00211646	0.0497886
Ppp1r14c	6233.01	-0.360992	0.117575	-3.0703	0.00213842	0.0502206
Tspan9	3354.36	-0.535686	0.174563	-3.06872	0.00214978	0.0504023
Mrpl45	3176.96	-0.402331	0.131163	-3.0674	0.0021593	0.0505407
Cers4	2352.81	0.309829	0.101117	3.06407	0.00218345	0.0510202
Gm19196	87.8467	-1.03195	0.337149	-3.06082	0.00220734	0.0514922
Slc16a1	9581.64	-0.406051	0.132824	-3.05706	0.00223516	0.0520542
X2010001K21Rik	142.555	0.694988	0.227499	3.0549	0.00225134	0.0523435
Hfe2	11773.7	-0.423898	0.138946	-3.05082	0.00228218	0.0529724
Gm30735	158.02	-0.926206	0.303851	-3.04822	0.00230202	0.0533441
Plcg1	3645.52	0.321343	0.10548	3.04647	0.00231542	0.0535657
Nt5e	1124.38	0.630751	0.207229	3.04373	0.00233664	0.053967
Phlpp1	1476.58	0.273409	0.0898519	3.04288	0.00234325	0.0540303
Caprin1	6928.25	-0.304416	0.10028	-3.03564	0.00240025	0.0552533
H6pd	2263.2	0.23927	0.0788338	3.03513	0.00240436	0.0552566
Csnk1e	2348.37	0.299888	0.0988546	3.03363	0.00241634	0.0554407
Ldlr	467.779	-0.64869	0.213933	-3.0322	0.00242775	0.0555199
Myh11	1526.57	-0.385238	0.127028	-3.0327	0.00242379	0.0555199
Mettl11b	65.2309	-1.02117	0.336977	-3.03038	0.00244243	0.0557642
Unc5b	1411.14	-0.37294	0.123237	-3.02621	0.00247643	0.0562643
Chac2	650.062	-0.468514	0.154813	-3.02633	0.00247543	0.0562643
Etv5	499.635	0.738647	0.24405	3.02662	0.00247302	0.0562643
Acvr2a	921.032	-0.33917	0.112186	-3.02327	0.00250055	0.0567199
Homer1	2313.31	-0.313648	0.10383	-3.02078	0.0025212	0.0570955
Zfp931	321.959	-0.522431	0.173178	-3.01673	0.00255516	0.0575958
Dffa	1716.14	-0.359048	0.118986	-3.01756	0.00254816	0.0575958
Zfp24	1591.3	-0.340728	0.112948	-3.01667	0.00255568	0.0575958
Pdhx	6733.14	-0.308727	0.102418	-3.01439	0.00257493	0.0579358
Dtna	2796.05	-0.369089	0.122472	-3.01367	0.00258112	0.0579818
Smg1	3946.33	0.250774	0.0832387	3.01271	0.00258927	0.0580712
Cnksr1	369.712	0.777354	0.258214	3.0105	0.00260819	0.0584018
Lpgat1	5552.04	-0.32695	0.10872	-3.00727	0.00263606	0.0586927
Dnajb14	1132.83	-0.395336	0.131419	-3.00821	0.00262789	0.0586927
Ankrd52	2967.08	-0.342139	0.113779	-3.00704	0.00263802	0.0586927
Golph3	2778.9	-0.224174	0.0745486	-3.00709	0.00263765	0.0586927
Retsat	2721.54	0.384875	0.128177	3.00267	0.00267621	0.0594477
Rab34	587.767	0.46242	0.154164	2.99952	0.00270401	0.0599698
Sh3gl2	94.3373	-0.8617	0.287592	-2.99626	0.00273313	0.0604234
Nt5dc3	2985.66	-0.276514	0.0922722	-2.99672	0.002729	0.0604234
Pptc7	7883.96	-0.319883	0.106811	-2.99485	0.00274581	0.0606076
Ankrd35	149.792	-1.07317	0.358424	-2.99414	0.00275224	0.0606536
Lmbrd2	793.106	-0.342659	0.114512	-2.99234	0.00276845	0.0609147
Papola	4530.39	-0.26572	0.0888493	-2.99068	0.00278354	0.0611501
Slc35e2	452.777	-0.402737	0.134817	-2.98729	0.00281465	0.0614466
Ndufab1	13209.3	-0.204938	0.0685814	-2.98824	0.0028059	0.0614466
Ppp2ca	9148.27	-0.220393	0.0737532	-2.98824	0.00280586	0.0614466
Inf2	863.29	0.405553	0.135745	2.98761	0.0028117	0.0614466
Sugp1	1202.23	0.420624	0.140917	2.9849	0.00283671	0.0618206
Gm8113	156.898	0.623739	0.209028	2.984	0.00284508	0.0618206
Morn2	173.046	0.614737	0.206005	2.98408	0.00284431	0.0618206
Sun2	5448.77	0.221381	0.0742383	2.98204	0.00286339	0.0621217
BC034090	2199.52	-0.333793	0.112051	-2.97893	0.00289258	0.0626576
Acp1	1238.54	-0.34809	0.116876	-2.97829	0.00289862	0.062691
Thap2	544.475	-0.463314	0.155658	-2.97649	0.00291573	0.0629635
Wipi2	2063.85	0.245587	0.0825367	2.97549	0.00292524	0.0630712
Efhd1	141.048	-0.737139	0.24801	-2.97222	0.00295656	0.0636481
Apod	466.814	0.727448	0.244971	2.96953	0.00298257	0.0641092
Rrad	8287.79	-0.441738	0.148813	-2.96841	0.00299342	0.0641448
Taf4b	265.936	-0.496413	0.167216	-2.9687	0.00299066	0.0641448
Klf2	2496.63	-0.616479	0.208059	-2.963	0.00304658	0.0651838
Eef2	76089.7	0.278092	0.0938824	2.96213	0.00305518	0.0652676
Nr3c2	1156.41	0.41203	0.139148	2.9611	0.0030654	0.0653858
Gbp2b	56.1679	4.56504	1.54306	2.95844	0.003092	0.0658524
Rasl10b	4118.27	-0.341532	0.115519	-2.9565	0.00311152	0.0661102
Ankrd33b	2042.58	-0.261292	0.088385	-2.9563	0.00311357	0.0661102
Vcan	870.983	-0.579292	0.195993	-2.95568	0.00311979	0.0661415
Cyp2d22	1502.51	0.481072	0.162818	2.95466	0.00313019	0.0662612
Bcs1l	1456.3	-0.405715	0.137477	-2.95115	0.0031659	0.0669156
Oas2	669.964	0.396164	0.134275	2.95039	0.00317375	0.0669801
Strn3	4537.51	-0.284223	0.0963514	-2.94986	0.00317919	0.0669936
Dynll1	962.556	-0.423678	0.143703	-2.94829	0.00319536	0.0672327
Osbp2	1710.05	0.329046	0.111662	2.94681	0.00321074	0.0674274
BC003965	1515.44	-0.337596	0.114576	-2.94647	0.00321428	0.0674274
Wdr83os	690.091	-0.349141	0.118525	-2.94572	0.00322209	0.0674897
Sfpq	3572.46	-0.294539	0.100015	-2.94494	0.00323018	0.0675577
Prag1	575.639	0.377519	0.128228	2.94413	0.00323866	0.0676337
Slc25a25	390.199	-0.490131	0.166653	-2.94103	0.00327125	0.0679076
Ttpal	751.174	-0.32296	0.109771	-2.94213	0.00325963	0.0679076
Mlycd	5784.74	0.351587	0.119523	2.94159	0.00326537	0.0679076
Syne3	307.753	0.498556	0.169499	2.94135	0.00326789	0.0679076
Rxrg	3159.47	-0.310931	0.105809	-2.93862	0.00329682	0.0681819
Zdhhc13	622.716	-0.372155	0.126641	-2.93867	0.00329626	0.0681819
Fstl1	4959.7	-0.415675	0.141463	-2.9384	0.00329912	0.0681819
X4631405J19Rik	493.147	-0.876912	0.298883	-2.93396	0.00334663	0.0683535
Mid1ip1	3845.93	-0.374234	0.127462	-2.93605	0.00332419	0.0683535
Myadm	6058.3	-0.313037	0.106637	-2.93555	0.00332962	0.0683535
Tnnt3	757.429	-5.34932	1.82308	-2.93422	0.00334385	0.0683535
Pth1r	352.892	0.492286	0.167737	2.93487	0.00333688	0.0683535
Gm24187	155.066	0.797127	0.271596	2.93497	0.00333577	0.0683535
Rbfox1	2228.15	0.39738	0.135399	2.93487	0.00333688	0.0683535
Qk	21044.8	-0.247585	0.0843342	-2.93576	0.00332733	0.0683535
Epb41l4aos	95.9994	0.805043	0.274495	2.93281	0.0033591	0.068508
Ppa1	2288.57	-0.273757	0.0933707	-2.93194	0.00336853	0.0686
Rabep2	511.895	0.396685	0.135373	2.93031	0.0033862	0.0687977
Desi1	921.094	-0.324231	0.110654	-2.93014	0.0033881	0.0687977
Cir1	633.706	0.483481	0.165101	2.92841	0.00340705	0.0689817
Slc16a7	546.209	0.374652	0.127929	2.92859	0.00340506	0.0689817
Tmem179	288.761	0.733044	0.250645	2.92463	0.00344863	0.0697223
Rnaseh2a	658.013	0.401647	0.137415	2.92288	0.00346814	0.0700154
Stc1	84.8456	-0.902427	0.308827	-2.92211	0.00347665	0.0700857
Tnrc6a	3435.04	0.256435	0.0878075	2.92042	0.00349562	0.0703663
Ipo13	3803.21	-0.289116	0.0990555	-2.91873	0.0035146	0.0706464
Ptgr1	243.303	-1.25495	0.430238	-2.91688	0.00353555	0.0709653
Cenpf	1005.95	0.632664	0.217067	2.9146	0.00356148	0.0713831
Gata4	5017.12	-0.268859	0.0922935	-2.91309	0.00357871	0.0716255
Rps3a3	826.655	3.4995	1.20239	2.91047	0.00360891	0.0721264
Fhl2	64883.3	-0.378566	0.130229	-2.90692	0.00365008	0.072741
Ptgds	18155.3	0.385681	0.132657	2.90734	0.00364513	0.072741
Stk11ip	751.614	0.388221	0.133638	2.90503	0.00367222	0.0727663
Hacd1	1895.31	-0.446837	0.15381	-2.90512	0.0036711	0.0727663
Rasd2	231.307	0.930833	0.320375	2.90545	0.00366721	0.0727663
Chkb	74.4884	0.8578	0.295231	2.90552	0.00366648	0.0727663
Prrx1	2746.34	-0.326605	0.112661	-2.89901	0.00374342	0.0732014
Ralgapa2	5202.99	-0.278175	0.0958342	-2.90267	0.00369995	0.0732014
Rnf114	3630.67	0.329	0.11349	2.89894	0.00374421	0.0732014
Thap3	558.859	0.400115	0.138017	2.89904	0.00374313	0.0732014
Pnpla6	789.281	0.3228	0.111238	2.90189	0.00370924	0.0732014
Ank1	14053	-0.262767	0.0905641	-2.90144	0.00371448	0.0732014
Mindy2	2869.24	-0.310166	0.106935	-2.90051	0.0037256	0.0732014
Isca1	10905.2	-0.229464	0.0791146	-2.9004	0.00372691	0.0732014
Serpina3g	44.1056	1.14132	0.39374	2.89867	0.00374755	0.0732014
Gm19277	183.465	0.769353	0.265471	2.89806	0.00375473	0.0732014
Skiv2l	1692.76	0.289355	0.0997575	2.90058	0.00372468	0.0732014
Ppp4r1	1685.36	-0.272061	0.0938834	-2.89786	0.00375715	0.0732014
Pdxk	485.777	-0.375569	0.129666	-2.89642	0.00377441	0.0734352
Loxl1	2850.52	-0.30523	0.105455	-2.8944	0.00379878	0.0738064
Tpm3.rs7	305.41	3.40977	1.1789	2.89235	0.00382376	0.0741883
Kras	1787.22	-0.266699	0.0922494	-2.89107	0.00383938	0.0742849
Loxl2	716.848	-0.514848	0.178057	-2.89149	0.00383424	0.0742849
Telo2	687.679	-0.396369	0.137155	-2.88993	0.00385328	0.0744505
Postn	2603.78	-0.528434	0.182944	-2.8885	0.00387089	0.0746873
X6820431F20Rik	347.505	0.485995	0.168352	2.88677	0.00389216	0.074994
Krba1	1984.63	0.253294	0.0877684	2.88594	0.00390252	0.0750899
Zfr	3703.43	-0.224048	0.0776491	-2.88539	0.00390932	0.0751171
Zfp949	414.404	0.47611	0.165074	2.88422	0.00392383	0.0752691
Naa40	1129.73	-0.387706	0.134459	-2.88345	0.00393342	0.0752691
Vps13a	1846.17	-0.264231	0.0916309	-2.88365	0.00393099	0.0752691
Stk38l	833.016	-0.332711	0.115439	-2.88214	0.00394988	0.0754468
Thap12	5032.87	-0.265026	0.0919672	-2.88174	0.00395483	0.0754468
Scml4	81.6362	-0.864928	0.300175	-2.88142	0.00395893	0.0754468
Cyp2u1	398.115	-0.420788	0.146246	-2.87725	0.00401154	0.0763451
Cep290	346.604	0.469843	0.163337	2.87653	0.00402075	0.0764161
Tnks2	4640.56	-0.221861	0.0771496	-2.87572	0.00403111	0.0765087
Dvl2	445.032	0.404158	0.140598	2.87457	0.00404574	0.0766823
Trak2	11652.3	-0.377891	0.13166	-2.8702	0.00410209	0.0773299
Limch1	10867.1	0.315248	0.109804	2.87102	0.00409156	0.0773299
Abhd17c	1196.53	-0.281335	0.0980153	-2.87032	0.00410053	0.0773299
Rhebl1	116.615	0.727044	0.253238	2.87099	0.00409192	0.0773299
Aox1	2145.2	0.632362	0.220405	2.86909	0.00411656	0.077498
Stx11	172.253	-0.667504	0.232733	-2.8681	0.0041294	0.077635
Ppp1r16b	477.202	-0.482686	0.168507	-2.86448	0.00417691	0.0778982
Top1	2513.63	-0.268201	0.0936142	-2.86496	0.00417061	0.0778982
X6330403L08Rik	1279.61	-0.352555	0.123055	-2.86502	0.00416989	0.0778982
Lrch1	954.282	0.286773	0.100112	2.86451	0.00417656	0.0778982
Ift140	504.08	0.837279	0.292083	2.86658	0.00414933	0.0778982
Prune2	8143.26	-0.294943	0.102953	-2.86482	0.00417242	0.0778982
Taf2	1097.18	-0.303653	0.106082	-2.86245	0.00420379	0.0782258
Ifit2	862.97	0.403096	0.140829	2.86231	0.00420569	0.0782258
Tbx3	472.224	0.534247	0.186739	2.86094	0.00422391	0.0784602
X8030462N17Rik	1131.71	-0.336611	0.117702	-2.85984	0.00423852	0.0786267
Mrpl1	1559.96	-0.287483	0.100586	-2.85808	0.00426206	0.0787494
Alox12b	75.7207	-9.50819	3.32606	-2.85869	0.00425388	0.0787494
Stk38	1773.19	-0.259348	0.0907312	-2.85842	0.00425751	0.0787494
Arhgap5	3787.36	-0.227436	0.079648	-2.85552	0.00429668	0.079284
Dnajc5	4090.91	-0.231853	0.0812513	-2.85353	0.00432366	0.0796646
Gm10557	72.6914	0.901045	0.315807	2.85316	0.00432873	0.0796646
Cyp4f17	216.677	0.557952	0.195658	2.85167	0.00434904	0.0799329
Atg5	754.216	-0.342492	0.120143	-2.8507	0.00436226	0.0799651
Sac3d1	433.98	-0.4736	0.166114	-2.85106	0.00435733	0.0799651
Scgb1c1	171.053	0.595641	0.209165	2.8477	0.0044036	0.0806171
Klf15	3046.69	0.515553	0.181093	2.84689	0.00441483	0.0806454
Ucp2	4863.99	0.447525	0.157251	2.84592	0.00442827	0.0806454
D7Ertd443e	136.945	0.728227	0.255874	2.84604	0.00442669	0.0806454
Tap2	1097.5	0.269845	0.0948001	2.84646	0.00442076	0.0806454
Slc2a1	899.534	0.501537	0.176278	2.84515	0.004439	0.0807355
Tmem255b	205.075	-0.609966	0.214586	-2.84253	0.00447572	0.0811915
Cnn1	152.942	-1.04605	0.367982	-2.84266	0.00447385	0.0811915
Fbxo32	7659.03	0.332098	0.116851	2.84206	0.0044823	0.0812054
Rbm33	2395.37	0.22681	0.0798364	2.84094	0.00449806	0.0813851
Fam53a	1280.92	-0.272174	0.0959758	-2.83586	0.00457023	0.0825839
Lims1	6017.19	-0.270535	0.0954204	-2.83519	0.00457986	0.0826508
Ube2q1	1726.47	0.25785	0.0909816	2.83409	0.0045956	0.0827208
Mrps11	853.912	-0.319438	0.112709	-2.83417	0.00459448	0.0827208
Lsm12	956.687	-0.386458	0.13639	-2.83349	0.00460432	0.082771
Mypn	6746.6	-0.180534	0.0637458	-2.83209	0.00462452	0.0830271
Trib2	1398.43	-0.252708	0.0892837	-2.8304	0.00464899	0.0833395
Slc25a46	3360.1	-0.244167	0.0862763	-2.83006	0.00465387	0.0833395
Selenoi	906.438	-0.287701	0.101708	-2.82871	0.00467367	0.0835868
Ppip5k2	8296.76	0.37381	0.132317	2.8251	0.00472658	0.084301
Blcap	2392.77	-0.239456	0.0847569	-2.8252	0.00472504	0.084301
Sod3	2093.12	-0.296536	0.104984	-2.82457	0.00473437	0.084301
Adcy7	870.132	-0.423924	0.150097	-2.82434	0.00473778	0.084301
Cox10	3390.63	-0.265013	0.0938917	-2.82254	0.00476449	0.0845088
Gm11627	93.1299	-0.895442	0.317271	-2.82233	0.00476763	0.0845088
Rhoq	6113.39	-0.226712	0.0803153	-2.82277	0.00476102	0.0845088
Cebpd	970.085	-0.373427	0.132512	-2.81805	0.00483157	0.0855335
Cdk9	1268.05	0.348159	0.123577	2.81736	0.0048421	0.0856112
Gm4956	43.7379	1.07949	0.383414	2.81548	0.00487045	0.0859057
Sqor	1972.29	0.28005	0.0994756	2.81526	0.00487373	0.0859057
Adnp	126.937	0.783102	0.278186	2.81503	0.00487723	0.0859057
Nudt16	300.475	0.572388	0.203459	2.81329	0.00490373	0.0862636
Tcaim	2686.4	-0.254946	0.0906597	-2.81212	0.00492164	0.0864696
Ccdc191	278.329	0.476572	0.169498	2.81166	0.0049286	0.0864829
Acss1	18585.5	0.353518	0.125799	2.81017	0.00495148	0.0867753
Msantd4	2333.63	-0.335785	0.119513	-2.80961	0.00496019	0.0868189
Gtf2e1	430.62	-0.369494	0.131548	-2.80882	0.0049724	0.0869235
Ly6c1	3936.25	0.392034	0.139593	2.8084	0.00497881	0.0869267
Ptch1	855.494	0.406271	0.144719	2.80731	0.00499577	0.0870049
Gnmt	142.715	0.969282	0.34526	2.80739	0.0049944	0.0870049
Pkia	10736.2	-0.30376	0.10831	-2.80454	0.00503888	0.0876464
Aldh5a1	2034.74	-0.248421	0.0886057	-2.80367	0.00505241	0.0877722
Kcnv2	652.399	0.628955	0.224365	2.80326	0.00505887	0.0877752
Glns.ps1	66.4268	0.947283	0.338076	2.80198	0.00507901	0.0880152
Cyp27a1	1204.47	0.323499	0.115512	2.80057	0.00510117	0.0882895
Ddx27	850.653	0.303456	0.108474	2.79749	0.00515009	0.0884775
Fcrls	450.42	-0.423472	0.151323	-2.79846	0.00513473	0.0884775
Snapin	3004.35	-0.268615	0.0959877	-2.79843	0.00513521	0.0884775
Fktn	1821.57	-0.492522	0.17603	-2.79795	0.00514283	0.0884775
Col6a2	4812.51	-0.45268	0.16172	-2.79917	0.00512344	0.0884775
Nr2f6	1495.47	-0.316972	0.113298	-2.7977	0.00514686	0.0884775
Glipr2	180.698	-0.649241	0.232234	-2.79564	0.00517974	0.0888775
Stau2	3020.01	-0.240567	0.0860647	-2.79518	0.005187	0.0888928
Mturn	1012.47	0.312896	0.11206	2.79222	0.00523481	0.0894921
Rras2	2465.03	-0.255028	0.0913267	-2.79248	0.00523058	0.0894921
Ugp2	13478.8	-0.296355	0.10622	-2.79001	0.00527067	0.089995
Agfg2	897.422	0.461115	0.165502	2.78615	0.00533378	0.0909612
Atf3	166.008	-0.943858	0.338972	-2.78447	0.00536147	0.0912104
Trim55	4317.27	-0.260135	0.0934108	-2.78486	0.00535516	0.0912104
Zfp91	7038.41	-0.219426	0.0788618	-2.78241	0.00539571	0.0916811
Pigq	1969.17	-0.287342	0.103316	-2.78121	0.00541564	0.0919078
Hdhd3	113.555	-0.755385	0.271751	-2.7797	0.00544098	0.0922255
Adcy6	11590.1	0.368813	0.132715	2.77898	0.00545305	0.0923181
Phospho1	390.071	-0.387397	0.139455	-2.77793	0.00547063	0.0925033
Prodh	1456.27	0.573791	0.206802	2.77459	0.00552714	0.0933458
Sike1	1875.21	-0.24839	0.0895697	-2.77314	0.00555177	0.0936483
Inafm1	826.755	0.463467	0.167232	2.77139	0.00558169	0.0939259
Ttc38	1663.84	0.32626	0.117708	2.77177	0.00557517	0.0939259
Camk2d	6883.76	-0.319657	0.115359	-2.77097	0.00558898	0.0939352
Gm10635	132.07	-0.738772	0.266724	-2.7698	0.00560902	0.0941587
Etl4	2133.37	0.240037	0.0866919	2.76885	0.00562544	0.0942269
Gpr137c	229.643	0.609109	0.22001	2.76855	0.00563069	0.0942269
Ublcp1	1526.16	-0.308968	0.111605	-2.76839	0.00563335	0.0942269
Rhou	366.419	0.444876	0.160749	2.76752	0.0056485	0.0942727
Arsa	797.971	0.305202	0.110283	2.76745	0.00564961	0.0942727
E2f3	498.391	-0.369567	0.133719	-2.76377	0.0057138	0.0952301
Hnrnpa1	7104.17	0.288767	0.104543	2.76218	0.00574161	0.0955793
Fbxo31	6112.63	0.441345	0.159862	2.76078	0.0057663	0.0956909
Zkscan17	935.471	0.313209	0.113471	2.76025	0.00577575	0.0956909
Arel1	2661.73	0.312531	0.113215	2.76052	0.00577101	0.0956909
Gfra1	553.153	0.396148	0.143463	2.76133	0.00575666	0.0956909
Ramp1	305.835	-0.602377	0.218344	-2.75885	0.0058005	0.0958732
Tmem86a	1344.22	0.26917	0.097559	2.75904	0.00579706	0.0958732
Tank	934.751	-0.375808	0.136251	-2.7582	0.00581202	0.09595
Gdpd5	1506.39	-0.293406	0.106443	-2.75645	0.00584318	0.0963238
Prkch	1106.8	0.274847	0.0997212	2.75616	0.00584848	0.0963238
Coq10b	967.786	-0.423592	0.153823	-2.75376	0.00589154	0.0964235
Ptgfrn	2928.8	-0.235154	0.085388	-2.75395	0.00588805	0.0964235
Snrpn	1995.55	-0.329305	0.119562	-2.75426	0.00588245	0.0964235
Trim16	365.372	-0.422741	0.153447	-2.75497	0.00586977	0.0964235
Lmf1	1265.39	-0.280487	0.10186	-2.75365	0.00589356	0.0964235
Cables1	279.408	0.508179	0.184557	2.75351	0.00589601	0.0964235
Tiam2	301.275	-0.451029	0.16385	-2.7527	0.00591065	0.0964538
Zbtb22	1022.67	0.27342	0.0993301	2.75264	0.00591169	0.0964538
Perp	6363.5	-0.349273	0.126935	-2.7516	0.00593054	0.0966484
Supv3l1	1621.2	-0.276785	0.10079	-2.74617	0.00602963	0.0981486
Palmd	2666.17	-0.288788	0.105209	-2.7449	0.00605301	0.0984143
Stk32b	47.1052	1.01423	0.369566	2.74438	0.00606254	0.0984545
Zfp428	491.602	-0.483361	0.17631	-2.74153	0.0061153	0.0988511
Mylk3	31672.9	0.308731	0.112612	2.74156	0.00611481	0.0988511
Rarb	422.893	-0.477157	0.174039	-2.74166	0.00611297	0.0988511
Xpo1	1947	-0.324062	0.118168	-2.74239	0.00609936	0.0988511
Wnk4	814.865	0.397221	0.144935	2.74068	0.00613117	0.0989928
Nudt19	2328.37	-0.29308	0.106958	-2.74013	0.0061415	0.099045
Srl	48813.4	-0.437347	0.159945	-2.73437	0.00625007	0.10068
Clic3	114.66	-0.899617	0.329217	-2.73259	0.00628376	0.101105
Ppme1	2078.44	-0.254837	0.0933017	-2.73132	0.00630808	0.10138
Shroom2	270.086	0.492043	0.18022	2.73025	0.00632873	0.101478
Clca3a1	79.6177	0.966366	0.353942	2.7303	0.00632774	0.101478
Paqr7	1092.56	-0.393218	0.144202	-2.72686	0.00639399	0.102407
Acsl6	651.947	-0.433108	0.158858	-2.72639	0.00640316	0.102436
Larp1b	3229.58	-0.230666	0.0846291	-2.72561	0.00641823	0.102559
Nudt15	261.069	-0.618684	0.227182	-2.7233	0.00646332	0.103044
Chordc1	2043.76	-0.465467	0.170905	-2.72353	0.00645875	0.103044
Myocd	1374.13	-0.279051	0.10249	-2.7227	0.00647508	0.103113
Slc11a2	1619.59	-0.278307	0.102235	-2.72223	0.00648434	0.103143
X2410006H16Rik	240.514	0.586181	0.215459	2.72062	0.006516	0.103529
Fam81a	439.096	-0.786503	0.289335	-2.71831	0.00656163	0.104079
Specc1	150.184	-0.608491	0.223865	-2.71811	0.00656553	0.104079
Ncoa4	2240.49	-0.283433	0.104297	-2.71757	0.00657632	0.104131
Tap1	815.216	0.40054	0.147419	2.71702	0.00658735	0.104188
Ttc19	2403.2	-0.250161	0.0921142	-2.71577	0.00661214	0.104461
Sptbn4	65.8725	0.926933	0.341647	2.71313	0.006665	0.105177
Bcl11b	138.943	-0.764625	0.281899	-2.71241	0.00667963	0.105289
Actc1	452308	-0.438046	0.161562	-2.71131	0.00670179	0.105519
D2hgdh	1525.28	0.248013	0.0915112	2.7102	0.00672431	0.105695
Orc4	1018.22	-0.332237	0.122616	-2.70958	0.00673693	0.105695
Camk2b	500.897	-0.421852	0.155703	-2.70934	0.00674171	0.105695
Grasp	527.003	0.398097	0.146939	2.70926	0.00674328	0.105695
Tfrc	6586.66	-2.2369	0.825926	-2.70836	0.00676176	0.105866
Pgap2	1712.24	-0.315362	0.116457	-2.70796	0.00676991	0.105875
Lypla1	2722.35	-0.305519	0.112949	-2.70494	0.00683174	0.106722
Hs3st5	151.977	0.599048	0.221564	2.70372	0.00685671	0.106992
Arl5b	961.325	-0.342393	0.126673	-2.70296	0.00687243	0.107118
Tet1	301.672	-0.587284	0.217368	-2.7018	0.00689652	0.107373
Sco1	916.929	-0.429496	0.15907	-2.70005	0.00693287	0.107819
Bmp7	103.733	-0.762185	0.282365	-2.69929	0.00694871	0.107945
Pno1	1401.03	-0.378704	0.140365	-2.69799	0.00697596	0.108248
E130309D02Rik	730.425	-0.372209	0.13811	-2.69502	0.00703845	0.109096
Eif4b	9499.48	0.302983	0.112462	2.69409	0.00705822	0.109281
Ubiad1	810.16	-0.396422	0.147199	-2.6931	0.00707905	0.109482
Etv3	1490.15	0.26342	0.0978756	2.69138	0.00711569	0.109927
Smpd1	9225.28	-0.271355	0.100844	-2.69083	0.00712745	0.109987
Trappc5	1527.38	-0.243744	0.0906098	-2.69004	0.00714436	0.110126
Sh2d4a	772.362	-0.554199	0.206195	-2.68774	0.00719375	0.110765
Nes	1738.48	-0.534434	0.199058	-2.68482	0.00725684	0.111487
Rassf4	744.555	0.388406	0.144706	2.6841	0.0072726	0.111487
Me1	6358.7	-0.326815	0.12173	-2.68475	0.00725837	0.111487
Bysl	1337.19	-0.360119	0.134159	-2.68427	0.00726885	0.111487
Hmcn1	1485.57	0.444847	0.165809	2.68289	0.00729892	0.111596
Nt5c1a	637.036	-0.500628	0.186624	-2.68255	0.00730635	0.111596
Mcm7	584.025	0.376313	0.140292	2.68234	0.00731081	0.111596
Lgi3	191.321	-0.576479	0.214919	-2.6823	0.00731171	0.111596
Gm12381	78.1791	-1.19534	0.445729	-2.68177	0.00732347	0.111653
Fkbp5	1501.19	1.85835	0.693491	2.6797	0.00736874	0.11222
Tbx20	3033.12	-0.303404	0.113272	-2.67856	0.00739405	0.112361
Gas7	651.667	-0.543625	0.202939	-2.67877	0.00738938	0.112361
Usp11	508.406	0.475266	0.177483	2.67781	0.00741055	0.112423
Cd163	1323.39	0.515888	0.192691	2.67728	0.00742231	0.112423
Dmxl1	2428.13	-0.331853	0.123938	-2.67757	0.00741587	0.112423
Fbxo21	2230.83	0.250961	0.0938497	2.67407	0.00749357	0.113366
Nynrin	185.774	0.565193	0.211386	2.67375	0.00750087	0.113366
Kyat3	1429.98	0.407347	0.152443	2.67213	0.00753719	0.113658
Zfp462	364.576	-0.408028	0.152722	-2.67171	0.00754664	0.113658
Gsdma	69.3561	-4.74102	1.77471	-2.67144	0.00755274	0.113658
Slc4a8	153.713	0.909826	0.340545	2.67168	0.00754728	0.113658
Dusp6	807.341	-0.412795	0.154579	-2.67044	0.00757516	0.113872
Emsy	1345.02	-0.244623	0.091639	-2.66942	0.00759822	0.114096
Sgcg	8951.75	0.290811	0.109	2.66798	0.00763078	0.114462
Ankzf1	948.106	0.343427	0.128778	2.66682	0.0076573	0.114736
Ubr2	6759.74	0.301988	0.113278	2.66589	0.0076784	0.114929
Pgam2	21360	-0.231468	0.0868559	-2.66497	0.00769957	0.115122
Hspa8	51175.2	-0.280836	0.105428	-2.66376	0.00772728	0.115413
Xrcc2	320.066	-0.586369	0.220165	-2.66332	0.00773745	0.115441
Tra2b	2052.78	-0.217278	0.081593	-2.66295	0.00774586	0.115443
Bbc3	243.629	0.505781	0.189982	2.66225	0.00776202	0.11556
Smim19	1696.38	0.243187	0.0914463	2.65934	0.00782946	0.116155
Rasd1	217.158	0.587116	0.22078	2.65928	0.00783073	0.116155
Hsp90aa1	6008.34	-0.325323	0.122344	-2.65909	0.00783526	0.116155
Pacsin2	12104.5	-0.189964	0.0714357	-2.65923	0.00783205	0.116155
Abcb1a	1393.03	0.519983	0.195645	2.6578	0.00786534	0.116477
Slc25a22	2364.75	0.445729	0.167746	2.65717	0.00788004	0.116571
Hspa12a	1950.34	-0.391676	0.147428	-2.65673	0.00789018	0.116598
Pnisr	4126.63	0.208274	0.0784076	2.6563	0.00790038	0.116625
Pdlim1	2424.52	-0.261339	0.0984133	-2.65552	0.00791857	0.11677
Akap13	4272.86	0.268421	0.101108	2.6548	0.00793555	0.116896
Snhg5	175.714	0.523544	0.197261	2.65407	0.00795279	0.117027
Wdr48	1449.43	0.234103	0.0882225	2.65355	0.00796506	0.117084
Zdhhc5	4565.85	-0.21251	0.0800965	-2.65317	0.00797392	0.117091
Fam32a	1705.97	0.290757	0.109636	2.65202	0.00800129	0.117369
Ctdsp2	6722.39	0.291133	0.109816	2.6511	0.00802304	0.117441
Myadml2	1303.13	-0.269125	0.101505	-2.65135	0.00801711	0.117441
Slc40a1	1185.58	0.490075	0.185082	2.64788	0.0080999	0.118016
Tomm5	3042.4	-0.358842	0.135576	-2.64679	0.00812597	0.118016
Smap2	2665.1	-0.273694	0.103411	-2.64666	0.00812918	0.118016
Tmem33	1596.56	-0.291264	0.110051	-2.64662	0.00813001	0.118016
Lgals7	207.015	-4.95524	1.87118	-2.6482	0.00809223	0.118016
Krtdap	339.002	-11.6703	4.40756	-2.64779	0.00810199	0.118016
X6430571L13Rik	247.48	-0.499939	0.188823	-2.64766	0.00810513	0.118016
Wdr81	887.133	0.303322	0.114535	2.64829	0.00809005	0.118016
Epha7	356.021	0.387147	0.14635	2.64535	0.00816059	0.118131
Grin2c	139.973	0.62901	0.23779	2.64524	0.00816334	0.118131
Scd2	1381.76	-0.430561	0.162759	-2.64539	0.00815973	0.118131
Gm10603	70.6874	1.09137	0.412726	2.6443	0.00818612	0.118338
Aak1	3384.3	-0.209428	0.0792273	-2.64338	0.0082083	0.118536
Dsc1	68.2736	-6.92682	2.62111	-2.6427	0.00822472	0.11865
Slfn2	407.754	0.462147	0.175088	2.6395	0.00830274	0.119652
Col5a2	1876.76	-0.370512	0.14057	-2.63578	0.00839446	0.120152
Ubxn10	344.368	0.69427	0.26345	2.6353	0.00840633	0.120152
Gtf2ird1	699.223	-0.321968	0.122159	-2.63565	0.00839761	0.120152
AI429214	53.956	0.899037	0.341005	2.63644	0.0083782	0.120152
Ednra	1726.59	0.332776	0.12624	2.63607	0.0083872	0.120152
Kpna3	4034.69	-0.29285	0.111064	-2.63678	0.00836983	0.120152
Eva1c	56.139	0.945254	0.358648	2.6356	0.00839876	0.120152
Csnk1a1	9865.6	-0.18101	0.0686779	-2.63564	0.00839786	0.120152
Nifk	714.983	-0.288889	0.109653	-2.63457	0.00842447	0.120165
Bin3	356.906	0.38797	0.147243	2.63489	0.00841635	0.120165
Ppp1r15a	982.519	0.4034	0.153139	2.63421	0.00843334	0.120169
Dgkz	3918.08	0.221534	0.0841341	2.63311	0.0084608	0.120427
Lingo3	1063.37	-0.602515	0.228851	-2.63279	0.00846876	0.120427
Gm9825	105.684	2.77607	1.05461	2.63233	0.00848024	0.120468
Tnni3k	6604.1	-0.247032	0.0939117	-2.63047	0.00852668	0.121004
Clasp1	20905.6	-0.329703	0.12546	-2.62795	0.00859015	0.121781
Ube2ql1	634.56	-0.362555	0.13798	-2.6276	0.00859905	0.121784
Pltp	1542.1	0.289332	0.110275	2.62373	0.0086973	0.123024
Clcf1	142.338	0.654782	0.249588	2.62346	0.00870425	0.123024
E130119H09Rik	172.289	0.753912	0.287451	2.62275	0.0087222	0.123153
Nrxn2	325.767	0.667379	0.254496	2.62235	0.00873252	0.123174
Pcif1	1774.03	0.25062	0.0956222	2.62094	0.00876877	0.12327
Gxylt2	273.329	-0.529942	0.202209	-2.62077	0.00877323	0.12327
Sobp	1343.94	-0.342549	0.130692	-2.62104	0.00876615	0.12327
Ifit1bl2	222.973	0.54772	0.208997	2.62071	0.00877471	0.12327
Ankrd23	957.438	-0.4508	0.172039	-2.62033	0.00878452	0.123281
Epdr1	1338.23	-0.24387	0.0930803	-2.61999	0.00879316	0.123281
Bahd1	989.994	0.302674	0.115606	2.61815	0.00884078	0.123824
Ky	1103.16	-0.673019	0.257143	-2.6173	0.00886293	0.12401
Abca3	1170.82	0.410574	0.156902	2.61676	0.0088769	0.124081
Crct1	307.874	-11.5313	4.40757	-2.61626	0.00888996	0.124139
Pias1	1213.75	0.257585	0.0985197	2.61456	0.00893433	0.124327
Gm11560	217.409	0.495507	0.189485	2.61502	0.00892221	0.124327
Jarid2	1443.9	-0.352498	0.134848	-2.61403	0.00894799	0.124327
Dnaja3	7207.97	-0.227185	0.0868947	-2.61449	0.00893614	0.124327
Washc1	1122.09	0.320728	0.122684	2.61426	0.00894199	0.124327
P2ry2	1609.28	-0.280463	0.107344	-2.61275	0.00898176	0.124672
Sh3pxd2a	3418.88	-0.221023	0.0846243	-2.61181	0.00900645	0.124891
Prkab1	2097.52	0.340163	0.130261	2.61139	0.00901744	0.124919
Sat1	1439.66	0.270825	0.103778	2.60966	0.00906318	0.125304
Ly6g6c	63.0935	-5.79547	2.22073	-2.60972	0.00906173	0.125304
Sav1	983.033	0.268788	0.103038	2.60862	0.00909074	0.12556
Nbeal1	2634.93	-0.258679	0.0992278	-2.60693	0.00913591	0.125681
Ccndbp1	1260.37	0.293548	0.112636	2.60617	0.00915614	0.125681
Agl	14131.6	-0.209802	0.0804946	-2.60641	0.00914981	0.125681
Samd5	190.817	-0.550145	0.210977	-2.6076	0.00911792	0.125681
Ggt5	426.941	0.414435	0.159035	2.60593	0.00916255	0.125681
Parp3	2454.38	-0.301271	0.115594	-2.60628	0.00915311	0.125681
Mrps23	6749.92	-0.22606	0.0867265	-2.60659	0.00914486	0.125681
Scn1b	1043.32	-0.350906	0.134693	-2.60523	0.00918129	0.125814
Ankrd13c	1309.44	-0.280911	0.107936	-2.60256	0.00925305	0.12644
Msrb3	6149.77	-0.24633	0.0946373	-2.60288	0.00924433	0.12644
Ccdc25	1122.42	-0.286134	0.109984	-2.60159	0.00927923	0.12644
Rnf144b	1339.86	0.390989	0.150251	2.60224	0.00926169	0.12644
Fam120a	6990.02	-0.272589	0.104781	-2.60151	0.00928136	0.12644
Usp16	1988.64	-0.25304	0.0972491	-2.60198	0.0092687	0.12644
X2610507I01Rik	544.586	-0.603038	0.231868	-2.60079	0.00930101	0.126585
Slc43a3	3615.05	0.31227	0.120104	2.6	0.00932232	0.126751
Disp1	510.632	-0.343459	0.132155	-2.59892	0.00935185	0.126798
Csnk2a1	5426.54	-0.262864	0.101168	-2.5983	0.00936854	0.126798
Tmem164	1741.6	0.424603	0.163422	2.59821	0.00937123	0.126798
Bsdc1	2282.02	0.247464	0.0952259	2.5987	0.00935763	0.126798
Zfp383	591.05	0.311501	0.119855	2.59897	0.00935026	0.126798
Gspt1	3578.74	-0.238214	0.0917044	-2.59763	0.00938695	0.126888
Foxo6	294.691	-0.439276	0.169146	-2.59703	0.00940349	0.126988
Ndufv2	21481.7	-0.167316	0.0644666	-2.59539	0.00944849	0.127472
Opa1	11630.5	-0.260298	0.10032	-2.59467	0.00946811	0.127614
X9530082P21Rik	305.885	0.805841	0.310718	2.59348	0.00950104	0.127934
Klhdc10	2778	-0.269807	0.10406	-2.59279	0.00952014	0.128068
Eif4g2	47063.6	-0.235534	0.0909334	-2.59018	0.00959254	0.128917
Pex19	6297.52	-0.226737	0.0875789	-2.58894	0.0096271	0.129026
Stom	6431.64	-0.260645	0.100663	-2.58927	0.0096179	0.129026
H2.D1	11466.3	0.274553	0.10605	2.5889	0.00962843	0.129026
Rad17	919.93	-0.352036	0.136024	-2.58805	0.00965222	0.129221
Hccs	3021.49	-0.342887	0.132513	-2.58757	0.00966552	0.129275
Mrgprf	174.002	-0.67533	0.261043	-2.58705	0.00968026	0.129348
Ece1	4343.83	0.225264	0.0871	2.58627	0.00970207	0.129516
Mllt3	622.215	0.303973	0.11755	2.5859	0.00971257	0.129532
Fbxw5	4054.83	-0.178425	0.0690389	-2.58441	0.00975447	0.129783
Lmod2	27223	0.240584	0.0930965	2.58424	0.00975929	0.129783
Pdcd4	840.247	0.282468	0.109294	2.58448	0.00975248	0.129783
Rab1a	6854.88	-0.16915	0.0654777	-2.58332	0.00978557	0.130008
A330023F24Rik	358.784	0.516939	0.200227	2.58177	0.00982948	0.130359
Pink1	32074.4	0.266747	0.103321	2.58173	0.00983068	0.130359
Manba	1316.9	-0.358896	0.139193	-2.57841	0.00992565	0.131244
Ddc	258.855	-0.533316	0.206824	-2.5786	0.0099203	0.131244
Taok1	2949.01	-0.267181	0.103615	-2.57858	0.00992065	0.131244
Cdc27	877.985	-0.325962	0.126452	-2.57775	0.00994453	0.131369
A930005H10Rik	153.546	0.921997	0.357777	2.57702	0.00996563	0.131524
Gpr153	910.968	-0.386438	0.149991	-2.57642	0.00998304	0.131629
Lrrc2	15460.6	0.277264	0.107708	2.57422	0.0100466	0.132341
Cnfn	269.698	-11.3404	4.4076	-2.57291	0.0100847	0.132718
Map3k5	2406.7	0.355959	0.138435	2.57131	0.0101316	0.133119
Ift57	424.738	0.394657	0.15349	2.57122	0.0101342	0.133119
Csde1	22878.8	-0.188685	0.0734312	-2.56955	0.010183	0.133292
Gm5898	53.996	0.881458	0.343051	2.56946	0.0101856	0.133292
Hey2	257.736	0.564725	0.219768	2.56964	0.0101804	0.133292
Coro6	20337.7	0.339434	0.132082	2.56987	0.0101737	0.133292
Blk	185.153	-0.740025	0.288276	-2.56707	0.010256	0.133929
Lactb	1130.57	-0.319384	0.124416	-2.56706	0.0102564	0.133929
Jmjd6	1394.25	-0.293351	0.1143	-2.56651	0.0102727	0.133929
Cxxc5	1465.09	-0.269502	0.104995	-2.56681	0.0102639	0.133929
Trip12	7342.63	-0.225332	0.0878405	-2.56524	0.0103105	0.134297
Hspb8	19944	-0.259027	0.101015	-2.56423	0.0103404	0.134346
Bcat2	5030.6	0.184769	0.0720588	2.56414	0.0103432	0.134346
Fus	10024.6	0.313433	0.122234	2.56421	0.0103411	0.134346
Mrpl47	1164.6	-0.363364	0.141878	-2.5611	0.0104341	0.1354
Elmod3	970.52	0.332877	0.130085	2.55892	0.0104997	0.136125
Samd8	831.167	-0.303863	0.118791	-2.55797	0.0105285	0.136372
Gpr160	122.764	0.718954	0.281185	2.55687	0.0105619	0.136389
Relb	508.492	-0.374925	0.146666	-2.55632	0.0105787	0.136389
Zfp688	141.352	0.551626	0.21569	2.55749	0.0105429	0.136389
Mir22hg	713.375	0.35679	0.13957	2.55634	0.0105778	0.136389
Bnip1	838.629	-0.32856	0.128517	-2.55654	0.0105718	0.136389
Zfas1	321.196	0.395088	0.154652	2.55469	0.0106283	0.136902
Akt1	10118.8	-0.186512	0.0730333	-2.5538	0.0106554	0.137125
Syf2	2339.79	0.306646	0.120138	2.55245	0.0106968	0.137531
Atp6v0a2	3152.13	-0.312389	0.12242	-2.55178	0.0107175	0.137669
Pard3b	765.035	0.282209	0.110634	2.55085	0.0107462	0.137801
Sh3d21	170.129	0.568638	0.222934	2.5507	0.0107507	0.137801
Helt	54.313	-1.41867	0.556235	-2.55048	0.0107574	0.137801
Ly6e	7149.44	0.233583	0.0916048	2.5499	0.0107753	0.137904
Gchfr	138.146	0.557724	0.218863	2.54828	0.0108256	0.138167
Pdk4	24305.4	1.67316	0.656519	2.54853	0.0108177	0.138167
Irgq	1602.56	-0.280777	0.110177	-2.54841	0.0108216	0.138167
Zfp125	57.7216	-0.986972	0.387453	-2.54734	0.0108549	0.138414
Egf	489.702	-0.503615	0.197802	-2.54606	0.0108948	0.138543
Fhl3	387.043	-0.671081	0.263548	-2.54633	0.0108862	0.138543
Lcp1	1300.14	-0.401049	0.157503	-2.54629	0.0108875	0.138543
Tpp2	2725.1	-0.240521	0.0945156	-2.54477	0.0109349	0.138675
Pck2	622.228	0.324395	0.127459	2.5451	0.0109246	0.138675
Tubb6	1494.66	-0.40536	0.159275	-2.54503	0.0109268	0.138675
Khk	682.23	0.424576	0.166886	2.54411	0.0109556	0.138684
Ints2	351.948	-0.461623	0.181445	-2.54415	0.0109545	0.138684
Arntl	930.947	-0.516417	0.203018	-2.54371	0.0109684	0.138721
Dcp2	1062.69	-0.304919	0.119911	-2.54288	0.0109944	0.138923
Ralb	1190.28	-0.285098	0.112239	-2.5401	0.0110822	0.139653
Polr3k	757.874	-0.340415	0.133992	-2.54057	0.0110673	0.139653
X9030612E09Rik	130.655	-0.677344	0.266648	-2.54022	0.0110784	0.139653
Ralgapb	2484.57	-0.230118	0.0906886	-2.53745	0.0111662	0.140585
Ly6a	3248.64	0.214277	0.0844615	2.53698	0.0111815	0.140651
Atad1	4516.92	-0.20425	0.0805892	-2.53446	0.011262	0.141536
Serpinb12	239.292	-11.1678	4.40762	-2.53375	0.011285	0.141697
Patj	1208.78	0.343343	0.135616	2.53172	0.0113504	0.142262
Tubb2a	1251.71	-0.388423	0.15342	-2.53176	0.011349	0.142262
Sacm1l	1393.74	-0.301041	0.118948	-2.53085	0.0113785	0.142487
Pex2	1688.27	-0.224834	0.0888615	-2.53016	0.0114011	0.142641
Sh3d19	1055.95	-0.297221	0.117518	-2.52916	0.0114335	0.142919
Plcb1	291.227	0.469327	0.185597	2.52874	0.0114472	0.142962
Cnot9	690.582	-0.283265	0.112041	-2.52822	0.0114642	0.143046
Thsd7a	343.087	0.421687	0.166906	2.52649	0.0115208	0.14324
Peg3	1201.94	0.538389	0.213021	2.5274	0.011491	0.14324
Taco1	2212.29	-0.419721	0.16611	-2.52676	0.0115119	0.14324
Ston1	515.847	0.460504	0.182242	2.52688	0.011508	0.14324
Eif4e	5938.34	-0.244621	0.0968429	-2.52596	0.0115383	0.14333
Slc25a5	12125.3	-0.299915	0.118765	-2.52529	0.0115603	0.143347
Nt5m	931.295	-0.26323	0.104234	-2.52538	0.0115572	0.143347
Hlf	1022.78	0.269058	0.106668	2.52238	0.0116564	0.144411
Car11	242.757	0.486337	0.192987	2.52005	0.0117339	0.145242
Arfgef1	5698.86	-0.207862	0.0824942	-2.51972	0.0117447	0.145248
Frat1	166.536	0.507655	0.201507	2.51929	0.0117592	0.145297
Gm10925	27649.5	-0.266909	0.105966	-2.51882	0.0117749	0.145363
Mapk8	1279.64	-0.249698	0.0991758	-2.51773	0.0118114	0.145684
Acaa1b	63.3113	1.64944	0.655256	2.51725	0.0118275	0.145754
H3f3b	5306.7	0.220692	0.0877597	2.51473	0.0119125	0.146484
Zkscan3	2483.35	-0.210362	0.0836576	-2.51456	0.0119183	0.146484
Rpl7l1	2211.89	-0.260938	0.103768	-2.51462	0.011916	0.146484
Ccdc88a	425.917	-0.367764	0.146478	-2.51072	0.0120485	0.147955
Nudt5	462.986	-0.358369	0.142784	-2.50986	0.0120779	0.148055
Ube3a	2622.99	-0.247035	0.0984173	-2.51008	0.0120705	0.148055
Ola1	1810.72	-0.292658	0.116694	-2.50792	0.0121446	0.148557
Fastk	12206.5	-0.189406	0.0755286	-2.50774	0.0121508	0.148557
Zfp512	1437.3	0.232924	0.09288	2.50779	0.0121489	0.148557
Psapl1	102.226	-6.92601	2.76314	-2.50657	0.0121908	0.148915
Rrs1	1189.83	0.320945	0.12807	2.50602	0.0122098	0.149017
Polr2e	3393.6	0.267779	0.10694	2.50401	0.0122794	0.149736
Rnf24	252.848	-0.45664	0.182471	-2.50253	0.0123308	0.150231
Lactb2	1606.26	-0.256269	0.102464	-2.50106	0.0123824	0.150728
Serpinb3a	216.329	-11.0223	4.40764	-2.50072	0.0123943	0.150741
Cep83os	322.905	0.388485	0.155374	2.50032	0.0124081	0.150778
Klhl30	3416.53	-0.321759	0.128743	-2.49923	0.0124465	0.150893
Ptpn4	1866.23	-0.254335	0.101747	-2.49967	0.0124308	0.150893
Senp5	957.258	-0.273188	0.109314	-2.49913	0.01245	0.150893
Rcor2	405.264	-0.477047	0.190949	-2.49829	0.0124793	0.151116
Sema3g	1146.72	0.516162	0.206645	2.49782	0.0124961	0.151188
Frmd4b	885.051	0.342074	0.137044	2.49609	0.012557	0.151794
Dmkn	449.519	-4.41247	1.76939	-2.49379	0.0126388	0.152651
Pfkfb2	2844.98	-0.338518	0.135791	-2.49293	0.0126695	0.152671
Mafk	2136.69	0.362176	0.145271	2.4931	0.0126633	0.152671
Aqp8	93.4258	-0.878184	0.352285	-2.49282	0.0126733	0.152671
Rad23b	5795.99	-0.159753	0.0641255	-2.49125	0.0127295	0.153215
Rtn4rl2	176.676	0.517979	0.208041	2.48979	0.0127818	0.153614
Sae1	1716.39	0.27755	0.111493	2.48941	0.0127956	0.153614
Usp54	1409.73	0.30112	0.120954	2.48954	0.012791	0.153614
Prepl	4321.43	-0.283621	0.113984	-2.48826	0.0128371	0.153979
Gata2	811.189	0.324591	0.130515	2.487	0.0128825	0.154237
Neil2	91.5039	0.941323	0.378536	2.48675	0.0128917	0.154237
Sqle	165.807	-0.850036	0.341806	-2.48689	0.0128864	0.154237
Ppp4r1l.ps	739.14	0.283221	0.113915	2.48624	0.01291	0.154322
Zbtb8a	147.333	0.608226	0.244854	2.48403	0.0129904	0.154766
Cdk2ap1	1879.49	0.253457	0.102026	2.48423	0.0129832	0.154766
Scn4b	2238.95	-0.494492	0.199071	-2.484	0.0129914	0.154766
Stip1	5548.32	-0.34271	0.137959	-2.48414	0.0129864	0.154766
Fzd7	589.868	0.374726	0.150911	2.48309	0.0130249	0.155032
Wdr92	647.551	-0.319579	0.128793	-2.48134	0.0130888	0.15566
Ndufaf1	2228.75	-0.306785	0.123733	-2.47941	0.0131599	0.156239
Gm10638	85.3203	0.716643	0.289024	2.47953	0.0131557	0.156239
Rpgr	225.481	0.454772	0.183483	2.47856	0.0131915	0.156349
Mllt11	495.65	-0.386822	0.156068	-2.47855	0.0131916	0.156349
Ergic1	1889.73	-0.225586	0.09106	-2.47734	0.0132368	0.156751
Gm26862	87.2986	-0.737854	0.297882	-2.47701	0.013249	0.156763
Sik3	4128.51	0.298374	0.120497	2.47619	0.0132791	0.156911
Mrpl39	3369.85	0.189037	0.0763457	2.47606	0.013284	0.156911
Rps9	13173.6	0.261774	0.105741	2.47561	0.0133007	0.156975
Mks1	274.053	0.467852	0.189042	2.47486	0.0133288	0.157173
Galt	1289.73	-0.281673	0.113884	-2.47334	0.0133858	0.157713
Tppp3	1259.68	-0.409136	0.165448	-2.47289	0.0134026	0.157777
Garnl3	134.266	0.566897	0.229402	2.47119	0.0134664	0.158105
Arhgap4	114.464	-0.670606	0.271332	-2.47153	0.0134535	0.158105
Siah2	342.867	-0.456989	0.184929	-2.47117	0.0134673	0.158105
Agtpbp1	7052.58	0.288092	0.116597	2.47084	0.0134796	0.158105
Rbm14	491.93	-0.384817	0.155756	-2.47064	0.0134871	0.158105
Nckap1	4656.15	-0.204144	0.0826644	-2.46955	0.0135283	0.15828
Bach2	133.625	0.693248	0.280776	2.46904	0.0135474	0.15828
Ado	1198.37	-0.246624	0.0998527	-2.46988	0.0135159	0.15828
Myc	149.552	0.770069	0.311864	2.46925	0.0135397	0.15828
Trmt1l	1257.88	-0.245848	0.099597	-2.46843	0.0135707	0.158419
Cited2	2510.67	0.363998	0.147604	2.46604	0.0136616	0.159058
Timm22	1224.92	-0.45922	0.186224	-2.46595	0.0136649	0.159058
Prkdc	558.749	0.335148	0.135893	2.46627	0.013653	0.159058
Mxi1	2176.22	0.32913	0.133478	2.46579	0.013671	0.159058
Slc8b1	570.926	0.299272	0.121433	2.46451	0.0137202	0.159498
Mkks	722.283	-0.318031	0.129088	-2.46367	0.0137523	0.159604
Afap1	733.913	-0.268183	0.108853	-2.46373	0.01375	0.159604
Crbn	1640.96	0.244911	0.0994399	2.46291	0.0137816	0.159679
Gm9752	44.7842	1.05879	0.429876	2.46301	0.0137776	0.159679
Lamb3	907.717	0.266378	0.10829	2.45986	0.0138993	0.160775
Cbx2	223.648	0.434519	0.176643	2.45987	0.0138987	0.160775
Aldh1l1	242.231	1.05419	0.428988	2.4574	0.0139947	0.161611
Mapk14	4032.22	-0.245228	0.0997914	-2.45741	0.0139944	0.161611
Gm49492	197.905	0.514952	0.209583	2.45703	0.0140091	0.161644
Heatr5b	2400.81	0.301754	0.122887	2.45554	0.0140675	0.162183
Pls3	2676.1	-0.262399	0.106927	-2.45401	0.0141274	0.162471
Jmjd4	837.691	-0.263003	0.107161	-2.45427	0.014117	0.162471
Ldah	1353.57	-0.265133	0.108022	-2.45443	0.0141109	0.162471
Tbc1d9	241.674	-0.45267	0.184616	-2.45195	0.0142085	0.163269
Tmem161b	564.535	-0.333951	0.136226	-2.45145	0.0142284	0.163333
Fyttd1	3643	-0.182278	0.0743624	-2.45122	0.0142375	0.163333
Lhfpl2	258.523	-0.425886	0.173865	-2.44952	0.0143047	0.163969
Apoe	21096.8	0.379186	0.154846	2.44879	0.0143336	0.164166
Plxna1	1947.41	-0.325741	0.133053	-2.4482	0.0143573	0.164302
Fgf13	2400.36	0.196595	0.0804309	2.44427	0.0145147	0.165522
Rassf8	2118.14	-0.286944	0.117439	-2.44335	0.0145517	0.165522
Zfp768	1656.77	-0.208244	0.0851821	-2.44469	0.0144975	0.165522
Idnk	623.192	0.284216	0.116329	2.44321	0.0145571	0.165522
Pdia6	3779.72	-0.283523	0.116047	-2.44317	0.0145588	0.165522
Selenop	12581.6	0.241587	0.0988434	2.44414	0.0145196	0.165522
Dnm1l	6973.2	-0.306003	0.125183	-2.44444	0.0145078	0.165522
Impa2	1053.28	-0.459489	0.188041	-2.44355	0.0145435	0.165522
Shoc2	1506.67	-0.237774	0.0973419	-2.44267	0.014579	0.165616
Inpp5k	1576.2	0.394624	0.161615	2.44176	0.0146158	0.1659
Gprc5b	1000.76	0.310371	0.12716	2.44078	0.0146554	0.166079
Asah2	1052.26	0.289823	0.118733	2.44097	0.0146479	0.166079
Epb41	5813.81	0.212464	0.0870849	2.43974	0.0146979	0.166174
Cacna1c	13696.9	0.323966	0.132763	2.44018	0.01468	0.166174
Lvrn	131.562	0.715752	0.293377	2.4397	0.0146995	0.166174
Id1	1344.78	0.302	0.123845	2.43854	0.0147467	0.166518
Megf9	991.27	-0.312781	0.128286	-2.43817	0.014762	0.166518
Zfp30	526.217	0.377958	0.155025	2.43805	0.0147668	0.166518
Vps11	1401.36	0.269476	0.110555	2.43749	0.0147897	0.166518
Usp25	3888.68	-0.198132	0.0812822	-2.43758	0.0147859	0.166518
Prox1	3600.18	-0.326512	0.133992	-2.4368	0.0148177	0.166565
Hspb3	299.654	-0.535985	0.219934	-2.43703	0.0148084	0.166565
Tgfbr3	1750.74	0.202452	0.083143	2.43499	0.0148921	0.167266
Arhgef19	3032.49	-0.324734	0.13339	-2.43447	0.0149135	0.167372
Armcx5	364.178	0.492965	0.202536	2.43396	0.0149346	0.167474
Ckap4	1603.11	-0.240776	0.0989422	-2.4335	0.0149535	0.167552
Plcg2	532.935	-0.449644	0.18484	-2.43261	0.0149904	0.167695
Uhrf1bp1	1032.1	-0.323166	0.132843	-2.43269	0.014987	0.167695
Osgin1	145.619	0.838391	0.344703	2.43222	0.0150068	0.167744
Rdm1	1373.81	0.251532	0.103547	2.42915	0.0151343	0.169034
Tnc	74.2529	-1.25737	0.518044	-2.42715	0.0152181	0.169834
Sgsh	373.426	0.36561	0.150911	2.42268	0.0154065	0.171787
Them6	733.959	0.270314	0.1116	2.42217	0.0154282	0.171787
Sdhaf2	2459.69	-0.218859	0.0903581	-2.42213	0.01543	0.171787
Msh2	1055	0.263495	0.108829	2.42118	0.0154702	0.172097
Mrps22	947.81	-0.393147	0.162457	-2.42001	0.0155201	0.172515
Clk4	2107.6	0.205033	0.0847698	2.41871	0.0155757	0.172994
Rrn3	2614.46	-0.248725	0.102867	-2.41792	0.0156094	0.17323
Yaf2	1127.21	-0.256648	0.106188	-2.41691	0.0156528	0.173574
AC154507.3	84.7159	-0.880574	0.364396	-2.41653	0.0156693	0.173619
Pmm2	1591.43	-0.248533	0.102891	-2.4155	0.0157138	0.173974
Traf3	1262.81	-0.440443	0.182409	-2.4146	0.0157527	0.174267
Ociad1	6536.77	-0.185382	0.076815	-2.41336	0.0158061	0.174442
Plxna4	1014.57	-0.293951	0.121789	-2.41361	0.0157952	0.174442
Cul2	2388.08	-0.247001	0.102336	-2.41362	0.0157947	0.174442
Coa5	9291.9	-0.29362	0.121745	-2.41177	0.0158754	0.17493
Far1	1193.72	-0.264628	0.109711	-2.41204	0.0158636	0.17493
Zbtb18	1851.6	-0.265033	0.109956	-2.41036	0.0159368	0.174944
Ckm	61684.4	-0.230548	0.0956511	-2.4103	0.0159393	0.174944
Ube2g1	3982.23	-0.212508	0.0881275	-2.41137	0.0158926	0.174944
Hlcs	468.323	0.37953	0.15741	2.41109	0.0159047	0.174944
Cyp4f13	455.009	0.357385	0.148274	2.4103	0.0159392	0.174944
Flad1	2537.87	-0.197785	0.0821036	-2.40897	0.0159977	0.175446
Gng11	917.354	-0.287868	0.119578	-2.40736	0.0160684	0.175945
Dock5	779.943	-0.352192	0.146293	-2.40745	0.0160645	0.175945
Dnaic1	69.2715	-0.864912	0.359349	-2.40689	0.0160891	0.176034
Etfrf1	2457.77	-0.236649	0.0983803	-2.40545	0.0161524	0.176466
Pvr	1451.11	-0.260973	0.108494	-2.40542	0.0161539	0.176466
Gm15543	976.58	-0.312386	0.129943	-2.40403	0.0162155	0.177001
Fam198b	1251.27	-0.319768	0.133051	-2.40334	0.0162459	0.177105
Cby1	689.406	-0.336574	0.14005	-2.40324	0.0162505	0.177105
Gm7072	453.612	-0.522815	0.21768	-2.40176	0.0163166	0.177686
Phactr1	330.7	0.442417	0.18423	2.40143	0.0163311	0.177705
Esam	2512.01	0.248507	0.10352	2.40057	0.0163698	0.177919
Wisp1	155.17	-0.594846	0.247809	-2.40042	0.0163762	0.177919
Sdf4	3885.85	0.244862	0.102094	2.3984	0.016467	0.178766
Aimp2	687.893	-0.282688	0.117881	-2.39807	0.0164817	0.178787
Dhdh	1283.99	0.321224	0.134033	2.3966	0.0165482	0.179368
Rps21	4505.09	0.36457	0.152238	2.39475	0.0166318	0.180076
Igdcc4	819.664	-0.363152	0.151665	-2.39443	0.0166462	0.180076
Ifngr2	7891.06	-0.285257	0.11914	-2.3943	0.0166522	0.180076
Crim1	2786.36	0.259843	0.108569	2.39333	0.0166961	0.180411
Them4	556.195	-0.363669	0.151978	-2.39291	0.0167154	0.18048
Rasgef1b	427.117	0.493911	0.20651	2.39171	0.0167702	0.180657
Grwd1	558.544	-0.294176	0.123057	-2.39057	0.0168225	0.180657
Mtif2	2563.58	-0.374288	0.156561	-2.39068	0.0168171	0.180657
Asap2	1153.56	-0.394757	0.165043	-2.39184	0.0167644	0.180657
Dvl3	2666.96	-0.214752	0.0898077	-2.39124	0.0167917	0.180657
Efna5	309.854	0.374165	0.156514	2.39061	0.0168204	0.180657
Zfyve27	1266.76	0.259821	0.108673	2.39085	0.0168096	0.180657
Fibin	563.38	0.314964	0.131836	2.38905	0.0168921	0.181055
Slc16a10	1138.74	-0.294759	0.123386	-2.38891	0.0168984	0.181055
Msrb1	4696.28	-0.392959	0.164478	-2.38913	0.0168882	0.181055
Tbrg4	3669.79	-0.200909	0.0841272	-2.38816	0.016933	0.181285
Gstm2.ps1	65.7509	0.785519	0.32912	2.38672	0.0169993	0.181392
Tmtc1	6267.61	0.354006	0.148335	2.38654	0.0170079	0.181392
Irf7	697.434	0.307154	0.128651	2.38751	0.0169631	0.181392
Lrrc10	7142.13	0.255204	0.106923	2.38679	0.0169963	0.181392
Gcdh	3321.09	0.286979	0.12021	2.38732	0.0169715	0.181392
Slc9a3r2	4270.66	0.27438	0.114992	2.38607	0.0170293	0.181481
Sbk2	1472.27	0.324528	0.136064	2.38512	0.0170737	0.181816
Synpo2	6865.91	-0.265867	0.111556	-2.38325	0.0171605	0.182331
Tchp	373.27	0.521732	0.218915	2.38326	0.01716	0.182331
Anapc5	10449.2	0.166476	0.0698528	2.38323	0.0171613	0.182331
Shb	1195.1	-0.347322	0.14577	-2.38267	0.0171875	0.18247
Atp1a1	59577.7	-0.262042	0.110063	-2.38083	0.0172739	0.183247
Pkp1	212.028	-6.55173	2.75281	-2.38001	0.017312	0.183373
Poldip2	6276.96	-0.159383	0.066963	-2.38016	0.017305	0.183373
Asrgl1	2668.76	0.209385	0.0880023	2.37931	0.017345	0.183583
Cnih1	1805.93	-0.26207	0.110194	-2.37826	0.0173945	0.183968
Kcnj2	1575.94	-0.254318	0.107031	-2.37612	0.017496	0.184901
Zdhhc21	651.714	-0.317441	0.133659	-2.375	0.0175491	0.185224
Trim29	98.8304	-4.51508	1.90116	-2.37491	0.0175532	0.185224
Izumo4	232.319	0.584755	0.246264	2.3745	0.0175727	0.18529
Fam19a3	251.237	-0.705435	0.297124	-2.37421	0.0175864	0.185294
Zfp275	518.164	0.426537	0.179697	2.37365	0.0176131	0.185296
Tcea3	3997.96	0.222851	0.0938841	2.37368	0.0176119	0.185296
C9orf72	1302.7	-0.24854	0.104815	-2.37122	0.0177296	0.186381
Aasdh	1087.13	0.244201	0.103022	2.37038	0.0177698	0.186569
Slc25a10	732.086	-0.355836	0.150124	-2.37029	0.0177743	0.186569
Sec23b	857.539	-0.309822	0.130769	-2.36923	0.0178251	0.186963
Kansl3	3688.98	0.175531	0.0741176	2.36827	0.0178715	0.187308
Uqcc1	7751.86	-0.28523	0.120472	-2.36761	0.0179034	0.187502
Fastkd1	1302.03	-0.23309	0.098485	-2.36676	0.0179447	0.187793
Ecd	1561.88	-0.227285	0.0960537	-2.36623	0.0179701	0.18786
Kcne1	285.883	-0.721699	0.30502	-2.36607	0.017978	0.18786
Slc35f5	4953.27	-0.189795	0.0803019	-2.36352	0.0181023	0.188594
Gas5	1177.48	0.316626	0.133957	2.36363	0.0180967	0.188594
Odf2	1298.01	0.377795	0.159843	2.36354	0.0181015	0.188594
X6430710C18Rik	48.1188	0.862996	0.36502	2.36424	0.018067	0.188594
Fmo5	921.652	0.329756	0.139585	2.3624	0.018157	0.189023
Ifit1bl1	221.195	0.606992	0.257009	2.36175	0.0181887	0.189212
Ndufc2	5444.75	-0.193092	0.0818072	-2.36033	0.0182585	0.189734
Kalrn	1065.94	-0.231072	0.0979045	-2.36018	0.0182662	0.189734
Lgr6	2937.69	0.254581	0.107914	2.35911	0.018319	0.189816
BC005624	1370.51	0.2154	0.0913277	2.35854	0.0183471	0.189816
Mrps17	1870.48	-0.24261	0.102869	-2.35844	0.0183517	0.189816
Vmp1	2555.9	-0.222018	0.0941407	-2.35836	0.0183557	0.189816
Vipas39	1302.28	-0.214355	0.0908893	-2.35842	0.0183531	0.189816
Dsg2	4867.35	0.220789	0.0936046	2.35874	0.0183369	0.189816
Colq	567.955	-0.530813	0.225225	-2.35681	0.0184327	0.190472
Gm44220	187.829	0.880139	0.373583	2.35594	0.018476	0.190745
Atp2a1	626.385	-3.80917	1.61698	-2.35573	0.0184865	0.190745
Mtfr1l	7322.62	-0.16624	0.070591	-2.35497	0.018524	0.19099
Camk2n1	1603.87	0.309679	0.131534	2.35437	0.018554	0.191018
Smg6	1432.02	0.223164	0.0947835	2.35447	0.0185494	0.191018
Sirpa	1888.49	-0.205134	0.0872866	-2.35012	0.0187675	0.193002
C1qtnf6	390.83	-0.581812	0.247582	-2.34998	0.0187745	0.193002
Eml1	4419.7	-0.295054	0.125616	-2.34886	0.0188308	0.193439
Ryr1	145.774	-4.05936	1.72899	-2.34782	0.0188836	0.193838
Tbc1d14	921.03	-0.282225	0.120269	-2.34662	0.0189445	0.194321
Zmat3	310.698	-0.359863	0.153398	-2.34594	0.0189791	0.19439
Nudt4	14736.7	-0.233737	0.0996238	-2.3462	0.0189659	0.19439
Acss3	122.968	1.17501	0.50112	2.34478	0.0190385	0.194854
Mcts1	883.79	-0.239856	0.102329	-2.34397	0.0190797	0.195063
Fbxo40	12012.9	-0.153886	0.0656662	-2.34346	0.0191061	0.195063
Acy3	1099.32	0.362593	0.154703	2.3438	0.0190886	0.195063
Pprc1	753.173	-0.279668	0.119349	-2.34328	0.0191148	0.195063
Ercc2	435.327	-0.341442	0.145791	-2.34199	0.0191812	0.195455
Smarcb1	874.172	-0.269628	0.115122	-2.34211	0.0191751	0.195455
Fam122b	361.012	0.348355	0.148815	2.34085	0.0192398	0.195513
Fblim1	13517.5	-0.306882	0.131085	-2.34109	0.0192276	0.195513
Necap1	963.755	-0.236956	0.101252	-2.34025	0.019271	0.195513
Gm45819	194.72	-0.572711	0.244644	-2.34099	0.0192326	0.195513
Nfix	6648.95	-0.275948	0.117901	-2.34051	0.0192573	0.195513
Crk	4767.29	-0.246269	0.105216	-2.34061	0.0192524	0.195513
Spint2	1296.37	0.280293	0.119859	2.33852	0.0193601	0.196274
Apobec3	464.376	0.382728	0.163708	2.33787	0.019394	0.196475
Tmem263	698.944	-0.353787	0.151404	-2.33671	0.0194542	0.196801
Gm24270	2239.42	0.290303	0.124236	2.33671	0.0194544	0.196801
Plxdc2	1300.96	0.275773	0.11805	2.33607	0.0194878	0.196996
Rdh13	1330.27	-0.280391	0.120065	-2.33533	0.0195261	0.197237
Dlat	25313.8	-0.239268	0.102467	-2.33507	0.0195399	0.197237
Gm11734	184.351	0.499167	0.213808	2.33465	0.0195617	0.197314
Ifit3	575.715	0.364301	0.156062	2.33434	0.0195779	0.197335
Fmo1	2158.75	0.454252	0.194719	2.33286	0.0196555	0.19761
Fam213a	1299.07	0.526463	0.225641	2.33318	0.0196385	0.19761
Tbc1d4	5560.15	0.279396	0.119754	2.33309	0.0196437	0.19761
Sgms1	2541.25	0.402602	0.172588	2.33274	0.0196618	0.19761
Rev3l	773.107	-0.248564	0.106575	-2.33229	0.0196854	0.197704
Tspan7	4733.58	0.205109	0.0879848	2.33119	0.0197433	0.197824
X5930430L01Rik	107.462	0.572796	0.24565	2.33175	0.0197136	0.197824
Mrpl34	2431.22	-0.347701	0.149157	-2.3311	0.0197482	0.197824
Aldh18a1	523.011	-0.454646	0.195045	-2.33099	0.0197541	0.197824
Gm14150	120.617	0.68955	0.29589	2.33043	0.0197834	0.197834
Mrpl35	1534.49	-0.282306	0.121126	-2.33068	0.01977	0.197834
Esf1	869.712	-0.286001	0.122756	-2.32984	0.0198146	0.198004
Coq5	6237.61	-0.269783	0.115823	-2.32926	0.0198453	0.198169
Lce3f	128.006	-10.2653	4.4078	-2.32889	0.0198647	0.198221
Ndufaf6	740.711	-0.3065	0.131633	-2.32845	0.0198882	0.198294
Zfp947	56.5713	-0.937351	0.402604	-2.32822	0.0199005	0.198294
Hrct1	173.184	0.555545	0.238675	2.32762	0.0199323	0.198366
Nr1d2	4459.72	0.250328	0.107562	2.32728	0.0199504	0.198366
Lpar6	434.04	0.525385	0.225725	2.32754	0.0199364	0.198366
Sdc1	418.526	-0.649829	0.27951	-2.32489	0.020078	0.199351
Adi1	1915.21	0.209345	0.0900406	2.32501	0.0200716	0.199351
S100a14	146.583	-6.43695	2.76935	-2.32435	0.0201066	0.199351
Engase	316.281	0.363562	0.156406	2.32448	0.0200997	0.199351
Zc3h3	220.43	0.490746	0.21116	2.32405	0.020123	0.199372
Tpm3	2759.51	-0.491736	0.211772	-2.32201	0.0202323	0.199463
Hilpda	144.157	0.512396	0.220611	2.32262	0.0201995	0.199463
Uba3	3181.6	-0.279242	0.120246	-2.32225	0.0202193	0.199463
Lrp1	8176.7	0.177108	0.0762672	2.3222	0.0202221	0.199463
Cmc2	1494.5	-0.327863	0.141161	-2.32262	0.0201995	0.199463
Pnpla3	161.905	-1.03834	0.446925	-2.32329	0.0201633	0.199463
Lppos	360.461	-0.334469	0.143999	-2.32272	0.0201944	0.199463
Ppp1r8	861.406	-0.309422	0.133287	-2.32148	0.0202612	0.199607
Per3	989.258	0.408861	0.176212	2.32028	0.0203258	0.200102
Tomm22	2853.14	-0.254753	0.109872	-2.31863	0.0204151	0.20084
Rps6ka3	2226.58	-0.19004	0.0820702	-2.31558	0.020581	0.20233
Pitpnb	2052.67	0.237872	0.102766	2.3147	0.0206293	0.202538
Itm2b	27994.2	0.228993	0.0989314	2.31466	0.0206313	0.202538
Irf1	1062.75	0.329753	0.142546	2.31331	0.0207055	0.20298
Kif20a	73.1487	-0.718845	0.310742	-2.31332	0.0207052	0.20298
Dhcr24	203.527	-0.697109	0.301731	-2.31037	0.0208679	0.204171
Katnal1	676.009	-0.284117	0.122992	-2.31003	0.0208862	0.204171
Sec13	2100.26	-0.236714	0.102483	-2.30978	0.0209001	0.204171
Urgcp	2956.66	-0.179611	0.0777579	-2.30988	0.020895	0.204171
Stc2	944.317	0.421307	0.182318	2.31083	0.0208421	0.204171
Aldh1a2	460.662	-0.474909	0.205666	-2.30912	0.0209367	0.204386
Ift81	2223.49	0.286185	0.123983	2.30826	0.0209849	0.204468
Agpat5	1154.22	-0.259932	0.112613	-2.30818	0.0209891	0.204468
Syne2	2563.2	0.17568	0.0761041	2.30842	0.020976	0.204468
Mtfp1	6402.65	-0.408335	0.176984	-2.30719	0.0210445	0.204715
Atp2a3	777.66	0.260522	0.112942	2.3067	0.0210715	0.204715
Mrm1	1135.27	-0.313662	0.135996	-2.30641	0.0210878	0.204715
Gm2445	51.047	1.22293	0.530146	2.30679	0.0210667	0.204715
AC151284.1	114.796	0.682314	0.295806	2.30663	0.0210755	0.204715
H2.K1	9138.19	0.31509	0.136636	2.30605	0.0211079	0.204762
Kat5	908.956	0.279073	0.121031	2.3058	0.0211221	0.204762
Car14	5456.35	-0.279932	0.121575	-2.30256	0.0213037	0.206272
Nop53	5108.05	0.220589	0.0958046	2.30249	0.0213073	0.206272
Wipf3	1931.83	0.189438	0.0823109	2.30149	0.0213639	0.206676
Cpsf2	1367.28	-0.242083	0.105232	-2.30047	0.0214216	0.207091
Vps29	1642.12	-0.222051	0.0965679	-2.29942	0.0214809	0.207126
Pcbp1	6593.13	-0.148962	0.0647843	-2.29936	0.0214847	0.207126
Dgat2	18224.7	0.205094	0.0891849	2.29965	0.0214679	0.207126
Vsp35l	1290.06	0.231434	0.100646	2.29947	0.0214782	0.207126
Trpv4	299.045	0.363844	0.158317	2.2982	0.0215505	0.207617
Polh	409.88	-0.363138	0.158122	-2.29658	0.0216429	0.208363
Tut1	570.588	0.3524	0.153468	2.29625	0.0216615	0.208399
Arglu1	3686.5	0.209234	0.0911821	2.29468	0.0217516	0.209121
Zswim4	632.913	0.280338	0.122199	2.29411	0.021784	0.209289
Mtx2	4007.7	-0.190797	0.0831878	-2.29357	0.0218155	0.209303
Clcn4	3739.38	-0.250351	0.109147	-2.2937	0.0218079	0.209303
Ube2d2a	3341.11	-0.171827	0.0749286	-2.29321	0.0218358	0.209354
Bace1	1592.92	-0.245762	0.10723	-2.29193	0.0219098	0.209684
Fam49b	1159.49	-0.23671	0.103296	-2.29157	0.0219304	0.209684
H2.Q6	1158.23	0.468931	0.20457	2.29227	0.02189	0.209684
Fez2	4085.56	-0.331607	0.144706	-2.2916	0.0219289	0.209684
Las1l	2917.04	0.248564	0.10852	2.29048	0.0219934	0.210142
Map2k2	4475.43	-0.183198	0.0800111	-2.28966	0.0220412	0.210455
Phf20l1	3371.43	-0.180829	0.0789943	-2.28914	0.022071	0.210595
Tsc22d2	1365.72	-0.202262	0.0884082	-2.28782	0.0221481	0.211043
Fdft1	2166.66	0.26672	0.116575	2.28798	0.0221388	0.211043
Snhg12	210.495	0.445365	0.194699	2.28745	0.0221697	0.211104
Rfc1	1694.3	0.198641	0.0868678	2.28671	0.0222128	0.21137
Lce3a	112.344	-10.077	4.40786	-2.28615	0.0222452	0.21153
Glrx	952.08	-0.336472	0.147195	-2.2859	0.0222599	0.21153
Hsdl2	12644	-0.294893	0.129051	-2.28509	0.0223076	0.211809
Eif4ebp1	3194.61	0.421862	0.184632	2.28488	0.0223197	0.211809
Ttc17	1849.76	-0.233918	0.102409	-2.28414	0.0223631	0.212077
Miip	531.287	0.440624	0.192974	2.28333	0.0224108	0.212241
Fzd8	476.526	0.345443	0.151277	2.28351	0.0224002	0.212241
Tmem35a	266.114	-0.535779	0.234679	-2.28303	0.0224285	0.212265
Lrba	2031.87	-0.237638	0.104172	-2.28121	0.0225359	0.212805
Herc3	2144.28	-0.213747	0.0936856	-2.28153	0.022517	0.212805
Cep131	473.841	0.363932	0.159532	2.28124	0.0225341	0.212805
Calm4	110.6	-10.0545	4.40786	-2.28103	0.0225467	0.212805
Pappa	43.5867	0.936031	0.410577	2.27979	0.0226199	0.213064
Pkn1	1999.2	-0.190155	0.0834005	-2.28003	0.0226061	0.213064
Rps3a2	249.325	2.16935	0.951497	2.27994	0.0226114	0.213064
Ephx1	1957.63	0.27818	0.122069	2.27887	0.0226746	0.2131
Pnrc1	3824.01	0.339453	0.148944	2.27905	0.0226638	0.2131
Csad	791.385	0.324747	0.142501	2.2789	0.0226728	0.2131
Gnpda1	723.927	-0.271549	0.119168	-2.2787	0.0226848	0.2131
Ppp1r12c	3544.16	0.295228	0.129622	2.27761	0.02275	0.213424
Clic5	11684.5	0.272465	0.119641	2.27735	0.0227652	0.213424
Lrpprc	11052.1	-0.21307	0.0935422	-2.27779	0.0227391	0.213424
Rnf157	351.318	-0.350163	0.153791	-2.27688	0.0227937	0.213547
Rpn1	3260.57	-0.200159	0.0879521	-2.27577	0.0228598	0.213658
Leo1	930.428	-0.325636	0.14305	-2.27638	0.0228236	0.213658
Endov	448.463	0.301379	0.132429	2.27577	0.0228596	0.213658
Pcbd2	580.119	0.28927	0.127115	2.27565	0.0228667	0.213658
Ube3c	2925.58	-0.229377	0.100819	-2.27513	0.022898	0.213806
Coro2b	495.894	0.3429	0.150745	2.27471	0.0229236	0.213902
Cul5	2641.55	-0.249491	0.109755	-2.27316	0.0230166	0.214627
Gm19410	108.777	0.569573	0.250624	2.27262	0.023049	0.214785
Cluh	16800.8	-0.197868	0.0870903	-2.27198	0.0230874	0.215
Rassf2	537.677	-0.473137	0.208291	-2.27152	0.0231156	0.215118
Armc10	512.388	0.334888	0.147562	2.26948	0.0232392	0.215694
Kctd21	239.474	-0.410775	0.180989	-2.26961	0.0232311	0.215694
Baiap2	497.924	0.299235	0.131809	2.27021	0.0231948	0.215694
Pstpip2	655.836	-0.266212	0.117293	-2.26964	0.0232294	0.215694
Socs2	1790.35	-0.336629	0.148382	-2.26866	0.0232892	0.216013
Mpped2	777.502	0.323446	0.142615	2.26797	0.0233311	0.216259
Bcl9l	2020.7	0.238635	0.105253	2.26725	0.0233747	0.216519
Rnf207	4954.49	0.268457	0.118466	2.26611	0.0234444	0.216845
Ccdc85c	2603.96	-0.253111	0.111703	-2.26593	0.0234554	0.216845
Tmem186	1434.54	-0.240287	0.106044	-2.26592	0.0234566	0.216845
Cry2	1544.03	0.351692	0.155233	2.26557	0.0234776	0.216896
Sorcs2	982.473	-0.286443	0.126483	-2.26467	0.0235332	0.217265
Snrnp200	5431.18	0.227892	0.100671	2.26373	0.0235905	0.217435
Tpm4	4381.27	-0.437649	0.193366	-2.26332	0.023616	0.217435
Sorbs3	1834.82	0.21929	0.0968982	2.2631	0.0236295	0.217435
AW209491	557.909	-0.331668	0.1465	-2.26394	0.0235776	0.217435
Fem1c	1207.89	-0.236991	0.104714	-2.26323	0.0236218	0.217435
Gsn	79786.6	0.329888	0.145791	2.26275	0.0236513	0.217492
Adgrl4	2763.74	0.219575	0.0970874	2.26162	0.0237212	0.217991
Sfswap	1819.37	0.206807	0.0914758	2.26078	0.0237729	0.218323
Mllt1	1625.26	-0.206986	0.0915786	-2.2602	0.0238086	0.218506
Plekho1	2217.91	-0.183064	0.081018	-2.25955	0.023849	0.218728
Mt4	103.503	-9.9588	4.40789	-2.25931	0.0238641	0.218728
Gal3st3	765.01	-0.486511	0.215469	-2.25791	0.023951	0.219381
Abcb7	2604.58	-0.329816	0.146119	-2.25717	0.0239975	0.219387
Lrrc61	381.038	0.317866	0.140803	2.25752	0.0239757	0.219387
Supt5	4242.25	0.248661	0.110166	2.25715	0.0239988	0.219387
Commd3	2651.13	-0.168895	0.0748788	-2.25558	0.0240967	0.220115
Strip2	4698.69	-0.290722	0.128915	-2.25515	0.0241236	0.220115
Agap2	426.583	0.569478	0.252537	2.25503	0.0241314	0.220115
mt.Nd4	603605	-0.239122	0.106047	-2.25487	0.0241416	0.220115
Agps	1664.76	-0.275811	0.122376	-2.2538	0.0242087	0.22034
Ehd4	27627.4	0.313687	0.1392	2.2535	0.0242279	0.22034
Zmym3	1287.16	0.223174	0.0990358	2.25347	0.0242295	0.22034
Trim13	363.825	-0.491617	0.218127	-2.25381	0.024208	0.22034
Ephb4	2614.44	0.175044	0.0776968	2.25291	0.0242646	0.220485
Slu7	1652.41	0.21879	0.0971228	2.25272	0.0242771	0.220485
Hmgb1	5307.64	0.179758	0.0798504	2.25119	0.0243736	0.221218
Dusp4	178.921	1.11066	0.493423	2.25092	0.0243904	0.221226
Ctgf	4055.62	1.0729	0.476813	2.25016	0.0244388	0.221378
Cln6	914.394	0.372626	0.165599	2.25017	0.0244379	0.221378
Cpeb1	916.21	0.246136	0.109475	2.24833	0.0245554	0.222289
Arfgef2	3779.04	-0.188908	0.0840755	-2.24688	0.0246475	0.222979
Rasl2.9	178.007	0.520888	0.231911	2.24607	0.0246998	0.223017
Zswim8	3045.31	0.171866	0.0765111	2.24629	0.0246852	0.223017
Tmed7	3125.57	-0.167484	0.0745643	-2.24617	0.0246931	0.223017
Ring1	1051.07	0.295842	0.131751	2.24546	0.0247386	0.223223
Wdr12	742.844	-0.272422	0.121415	-2.24373	0.0248498	0.223784
Gm13577	170.403	0.51659	0.230239	2.24371	0.0248511	0.223784
Hp1bp3	6328.38	0.150941	0.0672634	2.24403	0.0248302	0.223784
Igkv19.93	62.1213	7.43021	3.31189	2.2435	0.0248648	0.223784
Rgs2	1832.9	0.36831	0.164273	2.24207	0.0249571	0.22418
Tnni2	378.64	-3.11945	1.39103	-2.24254	0.0249266	0.22418
mt.Nd1	1.19768e+06	-0.286298	0.127685	-2.24221	0.0249475	0.22418
Cmtm6	1741.12	-0.247089	0.110275	-2.24067	0.0250472	0.224845
Jsrp1	50.1038	-1.63093	0.728199	-2.23968	0.025112	0.225281
Slc22a1	71.525	-0.686122	0.306605	-2.2378	0.025234	0.22623
Fsd1l	3054.06	-0.265925	0.118873	-2.23706	0.0252824	0.226518
Parp10	785.333	0.300051	0.134248	2.23506	0.0254134	0.227547
Ccdc58	637.059	-0.341832	0.152991	-2.23432	0.0254619	0.227688
X1810055G02Rik	265.697	-0.446393	0.199777	-2.23445	0.0254535	0.227688
Pdcd10	800.74	-0.234223	0.104857	-2.23373	0.0255008	0.227791
Adcyap1r1	450.522	-0.347674	0.155688	-2.23316	0.0255387	0.227791
Arhgap31	2620.14	0.212135	0.0949842	2.23337	0.0255246	0.227791
Rprd1a	1999.09	-0.223318	0.0999861	-2.23349	0.0255165	0.227791
Pigo	1403.84	-0.244578	0.109562	-2.23233	0.0255929	0.228128
Vwa3a	459.637	0.501877	0.224877	2.23178	0.0256293	0.228237
Naa35	2689.19	0.185126	0.0829546	2.23165	0.0256378	0.228237
Leng8	6630.92	0.225805	0.101246	2.23026	0.0257301	0.228912
C330013E15Rik	63.5049	0.719011	0.322572	2.22899	0.0258146	0.229518
Cxcl14	647.757	-0.303426	0.136143	-2.22873	0.0258316	0.229523
Ganc	1051.26	0.223097	0.100177	2.22703	0.0259453	0.230053
Aff1	3134.78	0.265507	0.119234	2.22677	0.025963	0.230053
Rgcc	1569.26	0.406768	0.18268	2.22667	0.0259692	0.230053
Pkmyt1	119.957	-0.970406	0.435647	-2.22751	0.0259134	0.230053
mt.Ty	676.371	0.311862	0.140062	2.22661	0.0259737	0.230053
Arhgef7	5711.84	-0.287654	0.129218	-2.22612	0.0260064	0.230083
Slc25a27	328.601	0.375297	0.168593	2.22606	0.02601	0.230083
Gmppb	336.075	-0.383574	0.172363	-2.22538	0.026056	0.230343
Agk	832.969	-0.245212	0.110233	-2.22449	0.0261158	0.230725
Hist2h2be	455.129	-0.293969	0.132167	-2.22423	0.0261328	0.230729
Sema3c	851.663	-0.340965	0.153372	-2.22313	0.0262069	0.231238
Fkbp4	20011.4	-0.358287	0.161213	-2.22245	0.0262531	0.231352
Ibtk	2210	-0.302407	0.136059	-2.22262	0.0262415	0.231352
Alpl	1745.91	-0.314587	0.141586	-2.22188	0.0262912	0.231483
Sema3f	850.697	-0.308651	0.138923	-2.22174	0.0263011	0.231483
Dsg1a	68.2134	-3.51886	1.58414	-2.2213	0.0263304	0.231594
Amotl2	3576.35	0.339855	0.15303	2.22084	0.0263615	0.231722
Pdlim7	1715.65	-0.20043	0.0902819	-2.22005	0.0264153	0.231757
Hrasls	1296.79	-0.338408	0.152425	-2.22017	0.0264072	0.231757
Trmt10c	954.962	-0.27827	0.125341	-2.22011	0.0264116	0.231757
Gm94	91.553	-9.78182	4.40796	-2.21913	0.026478	0.232161
Otud5	1651.04	0.193537	0.0872309	2.21868	0.0265086	0.232174
Parvb	4654.86	-0.294164	0.132589	-2.21862	0.0265128	0.232174
Abcb1b	483.423	0.405571	0.182933	2.21704	0.0266204	0.232916
Tpst1	814.487	0.258823	0.116751	2.21688	0.0266315	0.232916
Mhrt	2151.6	0.265974	0.11999	2.21664	0.0266476	0.232916
Gdpd1	532.99	-0.286644	0.129338	-2.21624	0.0266752	0.233011
E430018J23Rik	184.468	0.486409	0.219508	2.2159	0.026698	0.233065
Kit	218.459	-0.488141	0.220373	-2.21507	0.0267556	0.233129
Mief1	1103.27	-0.250157	0.112912	-2.21551	0.0267251	0.233129
Mettl22	1154.38	-0.215453	0.0972638	-2.21514	0.0267503	0.233129
Kprp	89.4558	-9.7484	4.40797	-2.21154	0.0269985	0.2351
Nsdhl	293.345	-0.423963	0.191778	-2.2107	0.0270568	0.23546
Casz1	2515.64	-0.223294	0.101053	-2.20967	0.0271283	0.235935
Pea15a	3828.71	-0.234173	0.106035	-2.20845	0.0272131	0.236078
Prrg1	565.924	0.330181	0.149482	2.20883	0.0271863	0.236078
Adarb1	1349.63	0.266192	0.120546	2.20821	0.0272294	0.236078
Sec23a	2509.72	-0.218885	0.0990881	-2.20899	0.0271754	0.236078
Zfp740	2133.79	0.18155	0.0821984	2.20868	0.0271971	0.236078
Ttyh3	822.709	-0.291184	0.131945	-2.20686	0.0273242	0.236669
Kcnj5	4353.27	-0.185065	0.0838629	-2.20675	0.0273314	0.236669
Rab40b	212.223	-0.425414	0.192877	-2.20562	0.0274104	0.237205
Glt28d2	205.494	-0.576922	0.261673	-2.20474	0.0274723	0.237446
Zc3h14	3187.12	-0.205777	0.0933304	-2.20483	0.0274664	0.237446
Nipsnap2	39326.1	0.15411	0.0699125	2.20433	0.0275015	0.237551
Fscn1	1285.85	-0.562617	0.255273	-2.20398	0.0275256	0.237612
Ppp1r3b	1254.37	-0.424121	0.192602	-2.20206	0.0276612	0.238636
Accs	389.649	0.352169	0.160052	2.20034	0.0277829	0.239538
Mtus2	8567.27	0.292206	0.132835	2.19976	0.027824	0.239743
Ptdss1	2384.92	-0.338538	0.154057	-2.19749	0.0279857	0.240988
Ankrd44	527.131	0.343683	0.156464	2.19656	0.0280516	0.241051
Wdr45	584.617	0.35359	0.160972	2.19659	0.02805	0.241051
Rnf128	3647.1	-0.251155	0.114328	-2.1968	0.0280346	0.241051
Rom1	874.375	-0.478872	0.218024	-2.19642	0.0280621	0.241051
Pcgf3	1684.32	-0.23203	0.105674	-2.19571	0.0281128	0.241337
Cntn2	337.126	0.429189	0.195591	2.19432	0.0282123	0.241894
Ak3	5110	-0.200315	0.0912797	-2.19452	0.0281979	0.241894
Dlst	32777.9	-0.207433	0.0945563	-2.19375	0.0282531	0.242095
Lypd5	84.5574	-9.66716	4.408	-2.19309	0.0283006	0.242353
Myo5b	2038.86	-0.26056	0.118837	-2.19258	0.0283373	0.242519
Chchd4	1293.3	-0.331273	0.151208	-2.19084	0.0284635	0.243151
Junb	822.842	0.460353	0.210106	2.19106	0.0284478	0.243151
X4930481A15Rik	746.992	0.512983	0.234143	2.19089	0.0284595	0.243151
Phka2	990.753	0.244912	0.111856	2.18952	0.0285591	0.243818
Defb4	83.3627	-9.64663	4.40801	-2.18843	0.0286381	0.244343
Os9	2557.89	0.27054	0.123648	2.18799	0.0286703	0.244468
Acss2	2033.45	-0.261708	0.119772	-2.18506	0.0288847	0.245748
Prps2	827.656	0.317875	0.145482	2.18497	0.0288908	0.245748
Bnip3	4597.12	0.384531	0.17595	2.18546	0.0288551	0.245748
Zfp758	398.759	-0.42084	0.192596	-2.18509	0.0288821	0.245748
Naa20	2600.56	-0.262569	0.120276	-2.18306	0.0290315	0.246533
Lce3b	81.9302	-9.62163	4.40802	-2.18276	0.0290538	0.246533
Tug1	1783.2	-0.191203	0.0875699	-2.18343	0.0290043	0.246533
Cyb5r3	4015.71	0.177707	0.0814113	2.18283	0.0290481	0.246533
Slc50a1	998.643	0.268919	0.123254	2.18183	0.0291224	0.246965
Chd2	2346.28	0.188165	0.0863356	2.17946	0.0292974	0.248116
Zfp330	848.11	0.273711	0.125597	2.17927	0.0293115	0.248116
Dusp5	313.446	-0.504459	0.231444	-2.17962	0.0292858	0.248116
Ybx1	38762.9	0.154889	0.0711095	2.17818	0.0293925	0.24835
Zfand4	243.575	0.47373	0.217479	2.17827	0.0293857	0.24835
Rab10	7194.96	-0.185633	0.0852195	-2.17829	0.0293842	0.24835
Tmcc2	2014.46	-0.204729	0.0940248	-2.17739	0.0294515	0.248698
Maea	3722.5	-0.189687	0.0871412	-2.17677	0.0294976	0.248786
Ranbp6	979.983	-0.243227	0.111728	-2.17696	0.0294835	0.248786
Gm34030	136.521	0.549922	0.252671	2.17644	0.0295225	0.248845
Ajuba	496.594	0.342781	0.157526	2.17603	0.0295527	0.248898
Ggnbp2	2721.8	0.258641	0.118867	2.17588	0.0295644	0.248898
Dnm1	605.148	0.250748	0.115271	2.17529	0.0296084	0.248968
Lrrc75b	80.17	0.73675	0.338662	2.17547	0.0295948	0.248968
Lig4	446.997	-0.294541	0.135432	-2.17483	0.0296428	0.249107
F730311O21Rik	69.597	-0.810266	0.372678	-2.17417	0.0296922	0.249372
Tmem9b	1702.5	-0.199475	0.091806	-2.17279	0.0297965	0.250097
Tacc1	2380.01	0.187276	0.0862537	2.17122	0.0299146	0.250937
Ybx3	8642.08	0.260085	0.119811	2.1708	0.0299461	0.251048
A830073O21Rik	44.6021	0.86073	0.396546	2.17057	0.0299638	0.251048
Ccnyl1	794.899	-0.230618	0.10635	-2.16849	0.0301215	0.251169
Col5a1	2459.23	-0.403285	0.185845	-2.17	0.0300066	0.251169
Gstk1	3193.04	0.212736	0.0981087	2.16837	0.0301306	0.251169
Iffo1	731.345	0.281125	0.129599	2.16919	0.030068	0.251169
Gm49204	48.1793	-0.825627	0.38078	-2.16825	0.0301397	0.251169
Trp53	818.826	-0.239712	0.110495	-2.16944	0.0300496	0.251169
Mrps27	1794.09	-0.23549	0.108609	-2.16824	0.0301403	0.251169
Krt5	422.223	-4.03671	1.8605	-2.16969	0.0300304	0.251169
Rtn4r	401.973	-1.35185	0.623292	-2.16889	0.0300911	0.251169
Ivd	19488.5	0.263778	0.121683	2.16776	0.030177	0.251325
Mbd2	3718.16	0.204568	0.0944369	2.16619	0.0302968	0.252172
Gm13050	399.372	0.482816	0.222939	2.16569	0.030335	0.252189
Tars	1297.85	0.476756	0.220123	2.16586	0.0303216	0.252189
Capn3	144.818	-0.689722	0.318521	-2.16539	0.0303578	0.252229
Vps33a	1851.03	0.175438	0.0810611	2.16427	0.0304439	0.252643
X2900052L18Rik	186.953	0.468955	0.216659	2.16449	0.0304271	0.252643
Lrrfip1	4442.06	-0.247104	0.114291	-2.16207	0.0306126	0.253627
Med19	579.652	-0.324294	0.149996	-2.16201	0.030617	0.253627
Lce3c	76.9501	-9.53117	4.40806	-2.16221	0.0306017	0.253627
X1110019D14Rik	165.109	-0.530998	0.245827	-2.16004	0.0307694	0.254285
Cadm4	1065.61	-0.36658	0.169703	-2.16013	0.0307624	0.254285
Sppl2b	1062.07	-0.238341	0.110326	-2.16033	0.0307468	0.254285
Slc22a23	832.845	-0.26434	0.122341	-2.16068	0.03072	0.254285
Slc2a9	100.886	0.565024	0.261693	2.15911	0.030842	0.254498
X4930413G21Rik	145.55	0.566582	0.262428	2.159	0.0308499	0.254498
Mylpf	337.533	-3.63721	1.68446	-2.15928	0.0308285	0.254498
Cdkn1c	863.71	0.311058	0.144101	2.15862	0.0308797	0.254593
Naa15	3579.4	-0.227289	0.10533	-2.15788	0.030937	0.254765
Nmd3	913.904	-0.220695	0.102273	-2.1579	0.0309356	0.254765
Dyrk2	1894.21	-0.276858	0.128318	-2.15759	0.0309594	0.254798
Slc33a1	513.433	-0.270798	0.125705	-2.15424	0.0312217	0.2559
Lce3e	75.1042	-9.49615	4.40808	-2.15426	0.0312197	0.2559
Grpel1	4730.87	-0.167212	0.0775697	-2.15563	0.0311125	0.2559
Il17ra	210.854	0.394136	0.182901	2.15491	0.0311689	0.2559
Hmbs	1433.21	-0.285597	0.132563	-2.15442	0.0312072	0.2559
Tmem39a	566.508	-0.288365	0.133838	-2.15458	0.0311944	0.2559
Rhot2	3851.38	-0.269946	0.125267	-2.15497	0.0311641	0.2559
Atp6v0c.ps2	289.174	2.08647	0.969002	2.15322	0.0313016	0.256405
Rere	2749.8	0.164216	0.0762934	2.15243	0.0313633	0.256579
Fam25c	74.7378	-9.48909	4.40808	-2.15266	0.0313455	0.256579
B3galnt2	1466.71	-0.376758	0.175054	-2.15225	0.031378	0.256579
Ada	307.258	-3.39433	1.5776	-2.15158	0.0314302	0.256779
Tcf7l1	557.317	0.288904	0.134282	2.15147	0.0314393	0.256779
Tigar	3219.98	-0.185289	0.0861511	-2.15075	0.0314962	0.256943
Ier3	871.743	-0.334491	0.155509	-2.15094	0.0314806	0.256943
Sirt1	753.222	0.278846	0.129671	2.15041	0.031523	0.257011
Mapre3	1848.54	-0.198213	0.0921954	-2.14992	0.0315612	0.257173
Xirp2	21570.4	-0.367823	0.171121	-2.14949	0.0315957	0.257303
A230050P20Rik	358.914	0.379241	0.176467	2.14908	0.0316282	0.257418
Nccrp1	73.849	-9.47184	4.40809	-2.14874	0.031655	0.257485
Plxna2	2376.08	0.214886	0.100062	2.14752	0.0317517	0.258098
Gm15777	81.607	0.683334	0.318226	2.14733	0.0317674	0.258098
H2afv	2316.45	0.233389	0.108802	2.14509	0.031946	0.259398
Mmachc	2336.13	-0.350379	0.163362	-2.1448	0.0319686	0.259431
Gstm7	1834.37	0.179858	0.0838715	2.14445	0.0319967	0.259508
Ryr3	141.869	0.511142	0.238417	2.1439	0.0320409	0.259599
Gm12033	95.2587	0.7793	0.363505	2.14385	0.0320451	0.259599
Tlr3	501.845	-0.332923	0.155332	-2.14329	0.0320896	0.259809
Atp2c1	2640.15	0.233871	0.109147	2.14272	0.0321355	0.260029
Map3k4	2655.33	-0.242706	0.113301	-2.14214	0.0321823	0.260257
Pip4k2c	2417.01	0.222488	0.103877	2.14184	0.032206	0.260298
Atp6v0a1	4727.21	-0.149347	0.0697459	-2.1413	0.03225	0.260351
Arl3	1800.92	0.212088	0.0990372	2.1415	0.0322336	0.260351
Prkcz	198.327	0.398394	0.186297	2.13849	0.0324769	0.262031
Ints13	1083.97	-0.266794	0.12478	-2.13811	0.0325077	0.262129
Erp44	1767	-0.21912	0.102545	-2.13682	0.0326128	0.262824
Ing5	775.203	0.26438	0.123811	2.13534	0.0327331	0.262882
Prcc	1918.41	-0.206609	0.096714	-2.13629	0.0326559	0.262882
Them5	70.9447	-9.41396	4.40812	-2.1356	0.0327122	0.262882
Cyba	1093.13	0.26339	0.123346	2.13536	0.0327312	0.262882
Rhot1	3967.11	-0.238875	0.111824	-2.13617	0.0326653	0.262882
Aldh6a1	11911.7	0.246867	0.115579	2.13592	0.0326857	0.262882
Map1lc3b	9820.05	0.243148	0.113889	2.13495	0.0327652	0.262989
Pgrmc2	2487.12	0.240071	0.112543	2.13315	0.032912	0.263886
Car8	996.788	-0.314074	0.147253	-2.13289	0.0329337	0.263886
Zfp354a	132.761	0.521071	0.244282	2.13307	0.0329187	0.263886
Polb	1171.54	-0.221679	0.103976	-2.13203	0.0330044	0.264301
Lmbr1	955.62	0.215116	0.100949	2.13094	0.0330944	0.264721
AC163032.1	119.965	0.61573	0.288949	2.13093	0.0330949	0.264721
Mfsd12	446.792	-0.324246	0.152235	-2.1299	0.0331796	0.265247
Gm14410	142.309	-0.592518	0.278485	-2.12765	0.0333664	0.265361
Smg5	3940.44	-0.21894	0.102896	-2.12778	0.0333549	0.265361
Cyr61	2192.72	-0.284803	0.133803	-2.12853	0.0332933	0.265361
Gbp10	63.3981	1.00815	0.473847	2.12759	0.0333708	0.265361
Por	2875.09	0.263847	0.123996	2.12787	0.0333476	0.265361
Spsb2	134.275	0.499409	0.234772	2.1272	0.0334031	0.265361
Clec1a	692.495	0.417995	0.196331	2.12903	0.0332521	0.265361
Lypd3	69.4926	-9.38413	4.40813	-2.12882	0.0332689	0.265361
Zfp827	908.819	-0.280037	0.131622	-2.12759	0.0333714	0.265361
Grn	4223.69	0.156498	0.0735169	2.12873	0.0332768	0.265361
Arhgap27	862.069	0.33355	0.156795	2.1273	0.0333952	0.265361
Plppr3	84.7281	0.641882	0.301845	2.12653	0.0334591	0.265633
Fam107a	335.464	1.26367	0.594294	2.12633	0.0334755	0.265633
Clip2	712.597	-0.328281	0.154405	-2.1261	0.033495	0.265637
Stum	259.384	0.543397	0.255779	2.12448	0.0336299	0.266061
Proser2	353.256	0.340295	0.160157	2.12476	0.033607	0.266061
Runx1t1	181.385	0.422599	0.198882	2.12487	0.0335975	0.266061
Dcaf15	501.141	0.270731	0.127444	2.12431	0.0336439	0.266061
Rnf185	1019.8	-0.239362	0.112669	-2.12447	0.0336309	0.266061
Neo1	3946.12	0.177323	0.0835225	2.12305	0.0337493	0.266744
Iscu	5433.06	0.198005	0.0932856	2.12256	0.0337903	0.26682
Smyd1	25831.4	-0.252074	0.118767	-2.12242	0.0338026	0.26682
Gm27252	120.211	0.699324	0.329519	2.12226	0.0338163	0.26682
Kdelr3	293.835	-0.404391	0.190583	-2.12186	0.0338494	0.26693
Hey1	510.896	0.297006	0.14	2.12147	0.0338819	0.267036
Capzb	10524.5	-0.134764	0.0635357	-2.12107	0.0339156	0.26715
Gpihbp1	2270.07	0.329468	0.155388	2.1203	0.0339809	0.267514
Ormdl1	438.153	-0.29074	0.137235	-2.11855	0.0341284	0.268523
Osbpl3	1419.18	0.205501	0.0970148	2.11824	0.0341548	0.268571
Smarcc2	5087.46	0.171923	0.0811713	2.11802	0.034173	0.268571
Epor	81.1061	0.79527	0.375586	2.11741	0.0342248	0.268644
Nufip2	1351.93	-0.21457	0.101344	-2.11723	0.0342401	0.268644
Zfyve21	1898.92	0.231942	0.109541	2.1174	0.0342261	0.268644
Mapkap1	2434.25	-0.237579	0.11227	-2.11614	0.0343331	0.26892
Sult1a1	1213.07	0.89373	0.422303	2.11632	0.0343172	0.26892
Dcun1d2	3779.78	-0.303488	0.143408	-2.11625	0.0343234	0.26892
Surf4	5967.1	-0.158664	0.0749909	-2.11577	0.0343644	0.269014
Map3k1	1034.9	-0.287397	0.135887	-2.11498	0.0344317	0.26939
Zfp442	170.879	-0.436627	0.206518	-2.11423	0.0344954	0.269737
Gm49336	902.653	-0.220619	0.104382	-2.11358	0.0345508	0.270019
Cpsf3	1969.03	0.218802	0.10354	2.11322	0.0345815	0.270108
C7	558.633	-0.333265	0.157828	-2.11157	0.0347234	0.271064
Map3k6	834.553	0.976261	0.462709	2.10988	0.0348684	0.271892
mt.Nd2	838578	-0.285484	0.135304	-2.10995	0.0348627	0.271892
Copz2	1401.56	0.202806	0.0961465	2.10935	0.0349147	0.272051
Spink5	101.282	-7.5003	3.556	-2.10919	0.0349279	0.272051
X4930453N24Rik	1129.82	-0.225737	0.10704	-2.1089	0.034953	0.272095
Pgpep1	1320.23	-0.28971	0.137396	-2.10858	0.034981	0.272134
Slc39a9	1113.12	-0.213264	0.10115	-2.10839	0.034997	0.272134
Ptprm	5193.02	0.208964	0.0991439	2.10769	0.0350579	0.272456
Msmo1	394.287	-0.507669	0.240976	-2.10672	0.0351419	0.272956
Gdap10	182.74	0.426706	0.202646	2.10567	0.0352327	0.273509
Plekho2	783.126	-0.383708	0.18228	-2.10504	0.0352876	0.273631
X4833420G17Rik	764.65	-0.301238	0.143094	-2.10517	0.0352765	0.273631
Vma21	1141.8	-0.267263	0.12702	-2.1041	0.0353695	0.274113
Strn	2010.27	-0.17105	0.0813106	-2.10366	0.0354078	0.274258
X2310061I04Rik	3929.73	-0.172687	0.0820978	-2.10343	0.0354284	0.274266
Sp2	652.959	0.273338	0.130033	2.10207	0.0355471	0.274756
Odc1	2813.12	-0.257247	0.12238	-2.10203	0.0355509	0.274756
Vmac	319.786	0.462607	0.220055	2.10223	0.0355327	0.274756
Ubac1	3614.5	-0.163951	0.0780498	-2.1006	0.035676	0.275418
Sorbs1	12571.6	0.205387	0.097767	2.10078	0.0356602	0.275418
Lrp3	605.057	0.315901	0.150428	2.10001	0.0357277	0.275664
Hmcn2	1980.63	-0.478061	0.227687	-2.09964	0.0357603	0.275752
Siah1b	155.243	0.444789	0.211883	2.09922	0.0357976	0.275752
Frat2	146.664	0.490116	0.233476	2.09921	0.0357983	0.275752
Rasa3	1313.18	0.239925	0.114309	2.09891	0.0358249	0.275759
Zfp41	160.586	-0.443364	0.211251	-2.09875	0.0358388	0.275759
Kbtbd4	329.494	-0.34329	0.163613	-2.09819	0.0358887	0.275785
Otud6b	3492.44	-0.246265	0.117463	-2.09653	0.0360352	0.275785
Zfyve9	1657.79	-0.192216	0.0916637	-2.09697	0.0359965	0.275785
Tmem69	841.866	-0.28683	0.136739	-2.09765	0.0359358	0.275785
Trim12a	666.826	0.244569	0.11664	2.09678	0.0360128	0.275785
Mast3	503.604	0.272013	0.129719	2.09694	0.0359993	0.275785
Actr8	1661.83	0.279357	0.133206	2.09719	0.0359767	0.275785
Gm16185	88.4053	-0.588105	0.280521	-2.09648	0.0360399	0.275785
Kansl2	2407.79	-0.179626	0.0856217	-2.0979	0.0359136	0.275785
Gpam	7178.22	0.406539	0.193828	2.09742	0.0359562	0.275785
Castor1	276.749	0.509131	0.242915	2.09593	0.0360886	0.276007
Apool	1905.85	-0.180576	0.0861741	-2.09548	0.0361288	0.276162
Ssr2	1692.31	-0.208631	0.0996105	-2.09447	0.036218	0.276579
Polg	3222.2	0.204629	0.0977022	2.09442	0.0362229	0.276579
Tmem50b	2657.02	-0.195361	0.0933315	-2.09319	0.0363318	0.277259
Rpl41	7011.64	0.158151	0.0755853	2.09235	0.0364073	0.277683
Sirt5	1534.97	-0.199435	0.0953661	-2.09125	0.0365054	0.278279
Bcl2l1	2083.81	0.806203	0.385706	2.0902	0.0365995	0.278844
Lancl3	100.573	0.598986	0.286647	2.08963	0.036651	0.279084
Zfp961	337.945	-0.333314	0.159541	-2.0892	0.0366896	0.279225
Bag3	10141.7	-0.156616	0.0749961	-2.08832	0.0367693	0.279527
Ube2n	2655.99	-0.193633	0.0927136	-2.08851	0.0367521	0.279527
Heyl	945.621	-0.225996	0.108245	-2.08782	0.0368141	0.279715
Dcaf8	9065.95	0.180137	0.0863117	2.08705	0.0368834	0.279725
Tstd3	800.583	-0.287937	0.137941	-2.0874	0.0368521	0.279725
Ap3m1	1806.09	-0.292059	0.139925	-2.08724	0.0368661	0.279725
Usp14	2709.14	-0.169991	0.0814555	-2.08692	0.0368957	0.279725
Tmem140	296.296	0.33507	0.160651	2.0857	0.0370054	0.280405
Otud7b	2838.33	0.244054	0.11703	2.08539	0.0370335	0.280465
Nampt	9702.85	0.231103	0.110843	2.08497	0.0370722	0.280606
Trp53inp2	29224.3	-0.363015	0.174138	-2.08464	0.0371019	0.280629
Gatd1	509.822	0.255929	0.122778	2.08449	0.0371155	0.280629
Nipa2	1067.65	-0.25706	0.123394	-2.08325	0.0372284	0.281026
X4933431K23Rik	282.239	0.41825	0.200746	2.08348	0.0372074	0.281026
Cchcr1	220.049	0.416636	0.199977	2.08342	0.0372128	0.281026
Slc25a28	1230.25	0.423776	0.203539	2.08204	0.0373388	0.281707
A4galt	188.089	0.540115	0.259501	2.08136	0.037401	0.281719
Slc2a13	50.9948	-0.834641	0.40097	-2.08155	0.0373832	0.281719
Sec22a	588.341	-0.269267	0.129359	-2.08155	0.0373839	0.281719
Zkscan14	271.51	0.353814	0.170026	2.08094	0.037439	0.281853
Gstm5	1340.09	0.237603	0.114265	2.07941	0.0375794	0.282757
Sfi1	616.461	0.344844	0.165874	2.07895	0.0376219	0.282783
Psmb3	2891.52	-0.198619	0.0955387	-2.07894	0.0376233	0.282783
Baz2b	1703.49	0.181143	0.0871703	2.07804	0.0377055	0.282791
Asap3	878.994	-0.349144	0.167988	-2.07839	0.0376737	0.282791
Nap1l1	4255.63	0.150513	0.0724238	2.07823	0.0376881	0.282791
Sec14l5	259.204	-0.468209	0.225304	-2.07812	0.0376984	0.282791
Uhmk1	1670.19	-0.19347	0.0931328	-2.07736	0.0377684	0.283054
Eps8	873.084	0.360143	0.173383	2.07716	0.0377871	0.283054
Fam208b	925.141	-0.225108	0.108381	-2.077	0.0378014	0.283054
Dzip1l	235.917	0.352112	0.169609	2.07602	0.0378922	0.28343
Wnk2	3994	-0.147047	0.0708308	-2.07604	0.0378905	0.28343
Trim56	1633.44	0.205248	0.0989012	2.07528	0.0379605	0.283789
Crebl2	988.973	0.269763	0.130055	2.07422	0.0380593	0.28407
Cd276	279.026	-0.360272	0.173675	-2.0744	0.0380423	0.28407
Tefm	818.359	-0.274135	0.132144	-2.07452	0.0380307	0.28407
Dera	244.224	-0.4134	0.199572	-2.07143	0.038319	0.285856
Aktip	2532.64	-0.170554	0.0823727	-2.07051	0.0384044	0.286205
Scn5a	16154.7	-0.259409	0.125289	-2.07049	0.0384068	0.286205
Atp1b1	11453.9	-0.213666	0.103231	-2.06978	0.0384728	0.286543
Dnmt3a	2624.96	-0.265483	0.128294	-2.06933	0.0385151	0.286705
Zfp944	338.513	-0.318268	0.153843	-2.06878	0.0385668	0.286937
Cyp2e1	669.179	2.73593	1.3232	2.06766	0.0386719	0.287566
Megf6	421.552	-0.290855	0.140691	-2.06733	0.0387033	0.287645
Atp5d	24225.3	-0.124464	0.0602214	-2.06678	0.0387553	0.287879
Dcakd	1910.08	-0.434589	0.210325	-2.06627	0.0388026	0.288077
Spock2	849.636	0.545497	0.26407	2.06573	0.0388542	0.288153
Tnfrsf19	277.232	0.352573	0.170673	2.06579	0.0388487	0.288153
Kcnip3	91.7724	0.661437	0.320256	2.06534	0.0388908	0.288271
Pde4a	4011.04	-0.319556	0.1548	-2.06432	0.0389877	0.288836
Alg9	485.271	-0.301654	0.146164	-2.0638	0.0390369	0.289047
Kctd18	409.351	0.282652	0.137059	2.06227	0.0391819	0.289659
Klf4	1864.06	-0.249671	0.121062	-2.06234	0.0391758	0.289659
Dcun1d4	753.686	-0.242183	0.117418	-2.06257	0.0391533	0.289659
Map1a	347.681	-0.420227	0.203953	-2.06041	0.0393597	0.290666
Plce1	1812.77	-0.2687	0.130401	-2.06057	0.0393443	0.290666
Eln	3552.01	-0.351207	0.170511	-2.05974	0.0394234	0.290982
X2810403D21Rik	64.9158	0.685485	0.33293	2.05895	0.0394991	0.291387
Usp24	5481.79	-0.210842	0.102441	-2.05819	0.0395719	0.29177
Exoc3	3628.48	-0.148161	0.0719992	-2.05782	0.0396073	0.291877
Col4a3	214.229	-0.452657	0.220001	-2.05752	0.0396363	0.291916
Dand5	423.209	-0.303289	0.147435	-2.05711	0.0396755	0.291916
Pxk	1653.96	0.17603	0.0855693	2.05716	0.0396711	0.291916
Cwc22	695.31	0.255421	0.124345	2.05414	0.0399622	0.293718
Slc38a7	851.147	0.258908	0.126042	2.05414	0.0399625	0.293718
Xpnpep1	2325.43	-0.226273	0.110202	-2.05326	0.0400472	0.294185
Hus1	665.983	-0.287581	0.140133	-2.0522	0.0401507	0.29479
Myoz1	88.768	-3.82695	1.86583	-2.05106	0.0402606	0.295442
Bcl7a	949.138	0.230571	0.112453	2.05038	0.0403275	0.295778
Ptpn14	2471.73	0.230283	0.112414	2.04853	0.0405085	0.296326
Calu	14397.1	-0.189173	0.092327	-2.04894	0.0404678	0.296326
Phkg2	420.298	0.292655	0.142832	2.04895	0.0404669	0.296326
Setdb2	321.662	0.549932	0.268439	2.04863	0.0404984	0.296326
Timm9	678.807	-0.257456	0.125652	-2.04896	0.0404664	0.296326
Psmd8	3714.4	-0.165696	0.0809103	-2.0479	0.04057	0.29662
Snhg17	245.345	0.372664	0.182009	2.0475	0.0406086	0.296747
Cd46	130.264	0.769399	0.37584	2.04714	0.0406439	0.29685
H2afy2	324.024	0.313185	0.153006	2.04688	0.0406697	0.296866
Add3	3510.77	-0.237883	0.116228	-2.04669	0.0406887	0.296866
Ddrgk1	3012.41	0.361521	0.17668	2.04619	0.0407378	0.296955
Ano4	471.826	-0.379201	0.185326	-2.04613	0.0407435	0.296955
Mrps2	1481.41	-0.295638	0.144553	-2.04519	0.0408362	0.297165
Selenbp1	5696.36	0.344494	0.168433	2.04529	0.0408262	0.297165
Plekhf1	947.839	-0.359783	0.175907	-2.0453	0.0408255	0.297165
Klhdc7a	605.461	-0.342463	0.167474	-2.04487	0.0408677	0.297239
Mecp2	2050.21	0.180371	0.0882214	2.04452	0.0409019	0.297333
Mob4	1634.42	-0.212427	0.104004	-2.0425	0.041102	0.298013
D5Ertd579e	5772.87	-0.195375	0.0956548	-2.0425	0.0411023	0.298013
Pds5a	2412.05	-0.215367	0.105429	-2.04276	0.041076	0.298013
AU020206	647.572	0.31978	0.156538	2.04283	0.0410697	0.298013
Riok2	980.5	-0.234782	0.114906	-2.04325	0.0410276	0.298013
Maf1	4532.53	0.221565	0.10853	2.04152	0.0411992	0.29856
Galm	1316.6	-0.328076	0.16073	-2.04116	0.0412347	0.298663
Kcnj15	89.2107	-0.721753	0.353654	-2.04085	0.0412659	0.298733
Sdc4	721.78	0.414645	0.203202	2.04055	0.0412952	0.298766
Ctdnep1	3300.34	-0.194343	0.0952486	-2.04037	0.0413132	0.298766
Plbd2	2677.23	0.154995	0.0759798	2.03995	0.041355	0.298913
Retreg2	1302.97	0.188429	0.0924044	2.03918	0.0414324	0.299162
Tmem56	124.857	-1.19532	0.586125	-2.03935	0.0414149	0.299162
Arl5a	1944.28	-0.248894	0.122119	-2.03812	0.0415378	0.299485
Tmem53	537.403	-0.257432	0.126319	-2.03795	0.0415547	0.299485
Klf13	2379.42	0.39638	0.194507	2.03787	0.041563	0.299485
Osr1	240.927	0.446584	0.219132	2.03797	0.0415534	0.299485
X1190002N15Rik	2214.24	-0.179197	0.0879696	-2.03703	0.0416465	0.299778
Sod2	26252.6	-0.219669	0.107831	-2.03715	0.0416347	0.299778
Syn2	157.151	0.502886	0.246923	2.03661	0.0416893	0.299931
Ivns1abp	68954.3	0.250746	0.123277	2.03401	0.0419508	0.301657
P4ha2	2204.46	-0.291054	0.143132	-2.03346	0.0420057	0.301896
Lce1a2	51.775	-8.9596	4.40838	-2.0324	0.0421128	0.302384
Myo10	2870.09	0.237718	0.116978	2.03216	0.0421372	0.302384
Ldlrad4	594.537	0.280889	0.138222	2.03215	0.0421386	0.302384
Ophn1	644.523	0.292869	0.14418	2.03127	0.0422272	0.302656
Efnb1	1319.3	0.232656	0.114537	2.03127	0.0422277	0.302656
Sort1	3288.73	0.170944	0.0841706	2.03092	0.0422634	0.302656
Ubxn7	1305.86	0.221113	0.10887	2.03098	0.0422566	0.302656
X1010001N08Rik	514.736	0.403548	0.198736	2.03057	0.0422987	0.302753
Calr	10565.1	-0.229113	0.112875	-2.02978	0.0423787	0.303123
Tpm1	340542	-0.178229	0.0878227	-2.02942	0.0424155	0.303123
Rsl24d1	923.479	-0.236152	0.116362	-2.02946	0.042411	0.303123
Fam98a	2262.73	-0.241185	0.118871	-2.02896	0.0424627	0.303305
Nfkbib	847.487	0.225937	0.111389	2.02836	0.0425233	0.303533
X2310022B05Rik	3794.99	-0.147104	0.0725286	-2.02822	0.0425382	0.303533
Cd63	5043.57	0.332101	0.163788	2.02763	0.042598	0.303697
Uba7	1332.74	0.27031	0.133317	2.02757	0.0426046	0.303697
Cpped1	3072.38	-0.186294	0.0918929	-2.02729	0.0426326	0.303741
Rhod	164.321	-0.461871	0.227862	-2.02698	0.0426642	0.303811
Klhl18	885.144	-0.223533	0.110291	-2.02675	0.0426879	0.303824
Gm13881	50.689	0.892142	0.44051	2.02525	0.0428416	0.304763
Wdr34	310.196	0.349643	0.172713	2.02441	0.0429279	0.305221
Timm23	8455.31	-0.204404	0.100996	-2.02388	0.0429826	0.305455
Kmt2b	1827.02	0.200965	0.0993161	2.02349	0.0430225	0.305582
Eif4e2	2255.43	-0.194764	0.096322	-2.02201	0.0431755	0.305949
Cdan1	652.873	0.237925	0.117715	2.02119	0.0432603	0.305949
Casp9	599.535	0.293637	0.145181	2.02257	0.043118	0.305949
D830050J10Rik	320.454	-0.338308	0.167395	-2.02102	0.0432779	0.305949
Rtn2	3532.3	0.246617	0.122061	2.02044	0.0433374	0.305949
Trpm4	1558.87	0.204628	0.101257	2.02087	0.0432935	0.305949
Muc6	51.871	0.785531	0.388645	2.0212	0.0432587	0.305949
X9230112J17Rik	359.362	-0.348144	0.172297	-2.02061	0.0433206	0.305949
Ccdc43	768.284	-0.28277	0.139859	-2.02182	0.0431951	0.305949
Acap2	1247.03	0.192627	0.0953383	2.02045	0.0433363	0.305949
Osbpl1a	3968.62	-0.171388	0.0847952	-2.0212	0.043259	0.305949
Ctnna1	29423.7	0.204648	0.101253	2.02115	0.043264	0.305949
X2310016G11Rik	91.2934	0.543612	0.269166	2.01962	0.0434233	0.306246
Alg1	748.815	0.257538	0.127513	2.0197	0.0434147	0.306246
Trim23	1170.5	0.219505	0.108706	2.01925	0.0434608	0.306356
Slc38a2	7788.33	-0.167566	0.0830008	-2.01885	0.0435025	0.306495
Lce1b	49.5627	-8.89661	4.40842	-2.0181	0.0435812	0.306585
Dach1	574.422	0.406265	0.201293	2.01828	0.0435622	0.306585
Ogn	5616.98	-0.322832	0.159957	-2.01825	0.0435654	0.306585
Gm14325	465.863	-0.288945	0.143222	-2.01747	0.043647	0.306812
Lce1d	49.4204	-8.89247	4.40842	-2.01715	0.0436795	0.306812
Lrrc4b	1035.22	-0.489237	0.242528	-2.01724	0.0436703	0.306812
Tmem147	3305.7	-0.192143	0.0952821	-2.01657	0.04374	0.307025
Dgke	1353.8	0.270064	0.133931	2.01644	0.0437538	0.307025
Nck2	650.881	-0.346023	0.171673	-2.01559	0.0438425	0.307493
Zfp868	362.753	0.37874	0.187929	2.01533	0.0438698	0.307529
Itgb6	804.676	-0.93544	0.464261	-2.0149	0.043915	0.307692
Bmpr1a	3786.72	-0.269069	0.133582	-2.01425	0.043983	0.308014
Lce1a1	48.898	-8.87714	4.40843	-2.01367	0.044044	0.308131
Myl6	5495.56	-0.166619	0.0827409	-2.01375	0.0440363	0.308131
Sertad1	296.163	0.409092	0.203212	2.01313	0.0441009	0.308374
Prelid1	1436.04	-0.207995	0.10336	-2.01233	0.0441849	0.308525
Acot3	49.5337	-0.82623	0.410576	-2.01237	0.044181	0.308525
Carns1	1756.76	0.203522	0.101139	2.0123	0.0441888	0.308525
[truncated: 20,087 more rows]
